# Supplementary material for: Transcriptional Hallmarks of Noonan Syndrome and Noonan-Like Syndrome with Loose Anagen Hair
Source: PubMed Central journal article supplement (PMC3332054; doi:10.1002/humu.22026), 2012-01-17
Supplement: humu0033-0703-SD1.pdf [file humu0033-0703-SD1.pdf]

## Transcriptional Hallmarks of Noonan Syndrome and Noonan-Like Syndrome with Loose Anagen Hair in Human Peripheral Blood Cells

G.B. Ferrero, G. Picco, G. Baldassarre, E. Flex, C. Isella, D. Cantarella, D. Corà, N. Chiesa, N. Crescenzo, F. Timeus, G. Merla, L. Mazzanti, G. Zampino, C. Rossi, M. Silengo, M. Tartaglia, E. Medico

### Supporting Information

|                                                                                         |                                     |
|-----------------------------------------------------------------------------------------|-------------------------------------|
| Supp. Methods .....                                                                     | 3                                   |
| I. Microarray data processing and filtering .....                                       | 3                                   |
| a. Scaling, Log <sub>2</sub> transformation and detection filtering .....               | 3                                   |
| b. Removal of genes correlated with age, sex, or differential leukocyte count.....      | 3                                   |
| c. Log <sub>2</sub> ratio transformation.....                                           | 3                                   |
| II. Microarray data analysis.....                                                       | 4                                   |
| a. Selection of genes differentially expressed between controls and mutated groups..... | 4                                   |
| b. Montecarlo simulation for FDR estimation.....                                        | 4                                   |
| c. Weighted average score for full leave-one-out classification analysis.....           | 4                                   |
| III. Functional data mining.....                                                        | 4                                   |
| a. Functional annotation analysis.....                                                  | 4                                   |
| b. Kinase Enrichment analysis.....                                                      | 4                                   |
| c. Protein-protein interactions analysis.....                                           | 5                                   |
| d. Binding site analysis and transcriptional circuits .....                             | 5                                   |
| Supp. Figures .....                                                                     | 6                                   |
| Supp. Figure S1 .....                                                                   | <b>Error! Bookmark not defined.</b> |
| Supp. Figure S2 .....                                                                   | <b>Error! Bookmark not defined.</b> |
| Supp. Figure S3 .....                                                                   | <b>Error! Bookmark not defined.</b> |
| Supp. Figure S4 .....                                                                   | <b>Error! Bookmark not defined.</b> |

|                       |                                     |
|-----------------------|-------------------------------------|
| Supp. Tables.....     | 9                                   |
| Supp. Table S1 .....  | <b>Error! Bookmark not defined.</b> |
| Supp. Table S2A ..... | <b>Error! Bookmark not defined.</b> |
| Supp. Table S2B.....  | <b>Error! Bookmark not defined.</b> |
| Supp. Table S2C.....  | <b>Error! Bookmark not defined.</b> |
| Supp. Table S2D ..... | <b>Error! Bookmark not defined.</b> |
| Supp. Table S2E.....  | 73                                  |
| Supp. Table S3 .....  | <b>Error! Bookmark not defined.</b> |
| Supp. Table S4A ..... | <b>Error! Bookmark not defined.</b> |
| Supp. Table S4B.....  | <b>Error! Bookmark not defined.</b> |
| Supp. Table S5 .....  | <b>Error! Bookmark not defined.</b> |

## Supp. Methods

### I. Microarray data processing and filtering

#### a. Scaling, Log<sub>2</sub> transformation and detection filtering.

Cubic spline-normalized probe signals, together with detection p-values, were obtained using the Illumina BeadStudio 3.1 software with background subtraction. To avoid negative values, the fixed amount of 50 was added back to each data point prior to log<sub>2</sub> transformation. Subsequent data filtering and analysis was carried out with Excel (Microsoft). To the 20584 probes analyzed, we applied a statistical filter to select genes with reliable signal detection, selecting genes with a detection value (as provided by BeadStudio) greater than 0.999 in at least 5 samples.

#### b. Removal of genes correlated with age, sex, or differential leukocyte count.

To filter out genes correlated to basic clinical features, we collected information on gender, age (years), white blood cells and lymphocyte counts for the NS samples presented in the Table below.

| ID                           | 01   | 34   | 36   | 40    | 02    | 13   | 05    | 17   | 29    | 11    | 16   | 28   | 08   | 20   | 41   | 56   |
|------------------------------|------|------|------|-------|-------|------|-------|------|-------|-------|------|------|------|------|------|------|
| <b>Gender</b><br>(1=F, -1=M) | 1    | -1   | 1    | 1     | -1    | -1   | 1     | 1    | -1    | -1    | 1    | 1    | 1    | -1   | -1   | -1   |
| <b>AGE (yrs.)</b>            | 7.06 | 1.23 | 5.99 | 12.83 | 20.92 | 3.18 | 16.21 | 5.66 | 19.01 | 36.16 | 3.01 | 6.46 | 4.21 | 1.85 | 4.56 | 1.77 |
| <b>WBC</b>                   | 8.41 |      |      |       | 9.12  | 13.7 | 10.7  | 8.11 | 8.67  |       | 14.8 | 6.16 | 6.78 | 10.3 |      |      |
| <b>LY%</b>                   | 12.3 |      |      |       | 29.3  | 46.3 | 17.9  | 32.1 | 32.9  |       | 62.8 | 43.5 | 53.3 | 79.4 |      |      |

For each detected gene, we calculated the Pearson correlation with each of the four clinical variables. Probes displaying a Pearson correlation higher than 0.5 with any of the clinical variables were removed from subsequent analyses, which left a total of 5605 probes employed for further analysis.

#### c. Log<sub>2</sub> ratio transformation

For each probe, the log<sub>2</sub> signal in each sample was converted into log<sub>2</sub> ratio against global average expression of that probe in all samples. To avoid distortions due to the different sample sizes (from  $n = 5$  for *SHOC2* samples to  $n = 21$  for controls), the global average was calculated by first averaging the log<sub>2</sub> signal within each group (CTRL, *PTPN11*, *SOS1* and *SHOC2*) and then by further averaging these four means. The log<sub>2</sub> ratio was then calculated by subtracting log<sub>2</sub> signal of the single sample from the global average.

## ***II. Microarray data analysis***

### **a. Selection of genes differentially expressed between controls and mutated groups.**

To be defined as differential between controls and mutated groups, a probe  $\text{Log}_2$  ratio signal had to display significance in three basic tests: (i)  $\log_2$  ratio between the means in control and mutated group greater than 0.5 (positive or negative); (ii) independent samples, two-way T-test p-value lower than 0.01; (iii) signal-to-noise ratio greater than 0.5 (positive or negative), according to the formula described by Golub and colleagues (Science 286:531-537, 1999).

### **b. Montecarlo simulation for FDR estimation.**

To estimate the False Discovery Rate, i.e. the fraction of false positives expected for the four signatures described in the main text, 2000 orthogonal random permutations of the samples were performed, whereby for each cycle of permutation the three statistical filters employed for genes selection were re-applied, recording the number of significant probes for each of the four signatures. For each signature, median and mean false positives were then compared with true positives as illustrated in Supp. Table S3.

### **c. Weighted average score for full leave-one-out classification analysis.**

After removing a sample from the dataset and redefining the four signatures, the left-out sample was classified by a weighted average score, obtained by subtracting average  $\log_2$  ratios of probes with higher signal in control samples from average  $\log_2$  ratio of probes with higher signal in mutated samples.

## ***III. Functional data mining***

### **a. Functional annotation analysis**

To define functional annotation keyword enrichment in the mutation-specific signatures, we uploaded the lists of Illumina probes belonging to the *PTPN11*, *SOS1* and *SHOC2* signatures on the David Ease web-based annotation tool (<http://david.abcc.ncifcrf.gov/>). Three types of lists were uploaded for each signature: (i) all probes, both up- and down-regulated in mutated samples; (ii) only probes up-regulated in mutated samples; (iii) only probes down-regulated in mutated samples. As a background list, we employed the 5605 probes passing filtering criteria mentioned in the Results section. Subsequently the various lists underwent “Functional Annotation Clustering” analysis, returning Benjamini corrected enrichment p-values for functional clusters. The output of this analysis was filtered to include only results with corrected p-values of less than 0.01.

### **b. Kinase Enrichment analysis**

To identify substrates of kinases in the signatures, lists of gene symbols corresponding to Illumina probes of the *PTPN11*, *SOS1* and *SHOC2* signatures were uploaded on the web-based Kinase Enrichment Analysis tool (<http://amp.pharm.mssm.edu/lib/kea.jsp>). The output of this analysis was filtered to include only results with kinase enrichment p-values of less than 0.01.

### c. Protein-protein interactions analysis

To check the signatures for enrichment in protein-protein interactions, we employed two web-based tools, Gather (<http://gather.genome.duke.edu/>) and Gene2Network (<http://actin.pharm.mssm.edu/genes2networks/>). The first employs data from two large-scale protein-protein interaction studies in humans, and the second integrates multiple small-scale, high-quality protein-protein interaction datasets. Lists of gene symbols corresponding to Illumina probes of the *PTPN11*, *SOS1* and *SHOC2* signatures were uploaded on the two websites and “in silico” protein-protein interaction analysis was performed. To achieve complete independence between the two analyses, Gene2Network analysis was conducted excluding the “Vidal and Stelzl” dataset, which is by default employed by Gather. Additional parameters of Gene2Network analysis were the following: (i) max path length threshold =2; (ii) significance cut-off =3; (iii) max interaction for reference=1; (iv) min reference per interaction=no filter.

### d. Binding site analysis and transcriptional circuits

To analyze transcription factor activity, a curated, non-redundant list of transcription factors (TFs) was extracted from the JASPAR CORE database (<http://jaspar.genereg.net/>). This list of TFs was then filtered to maintain only those TFs with available binding site data in the Opossum tool (<http://www.cisreg.ca/cgi-bin/oPOSSUM/opossum>). Eleven of these TFs were found in one or more of the three signatures: *GFII* (*PTPN11* and *SOS1* signatures), *GABPA* (*SOS1* and *SHOC2* signatures), and nine TFs only in the *SHOC2* signature (*CEBPA*, *CREB1*, *ELK1*, *ELK4*, *MAX*, *NR3C1*, *SP1*, *STAT1* and *ZNF395*). For each of these eleven TFs, we verified, if the respective *PTPN11*, *SOS1* or *SHOC2* signature was enriched in genes containing one or more specific TF binding sites. To this aim, we employed the “Custom binding site analysis” of Opossum, uploading lists of gene symbols corresponding to Illumina probes of the *PTPN11*, *SOS1* or *SHOC2* signatures, subdivided in up-regulated and down-regulated in mutated samples. As a background list, we employed the 5605 probes passing filtering criteria mentioned in the Results section. The amount of upstream / downstream sequence was set to (2000/0) and Matrix match threshold to 80%. We considered significant Opossum Z-Scores greater than 5 and p-values lower than 0.05. Putative transcriptional circuits highlighted by Opossum and including a TF and its enriched targets in the same signature were consolidated by a complementary procedure, that involved for each given TF: (i) retrieval, using Opossum, of all genes containing binding sites for that TF (putative targets), in the 5605-gene background list and in the signature(s) containing the TF; (ii) hypergeometric distribution analysis of enrichment of putative target genes in the signature vs. background, with subsequent p-value calculation. Results of both analyses are shown in Supp. Table S5.

**Supp. Figures**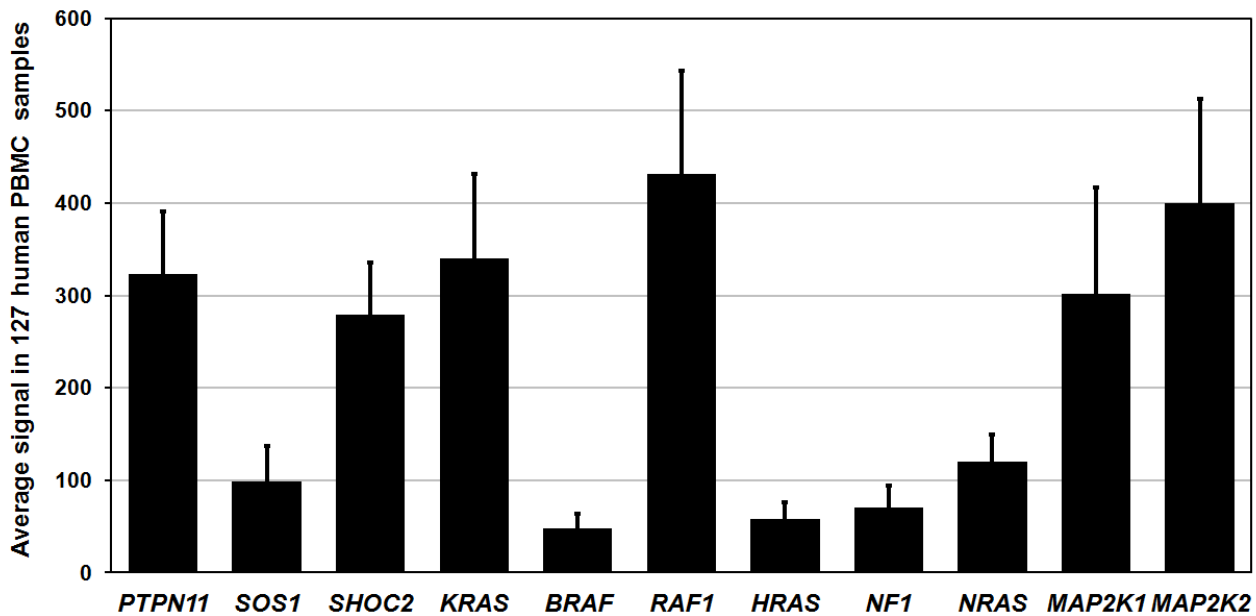

**Supp. Figure S1.** Expression levels in human PBMCs of RAS/MAPK pathway genes mutated in RASopathies. Histograms represent average expression signal in 127 human PBMC samples (Burczynski et al., *J Mol Diagn.* 2006). *RAF1*, *MAP2K1*, *MAP2K2*, *KRAS*, *SHOC2* and *PTPN11* genes show high level of expression, while *SOS1*, *NF1*, *HRAS* and *BRAF* present lower, but detectable expression values.

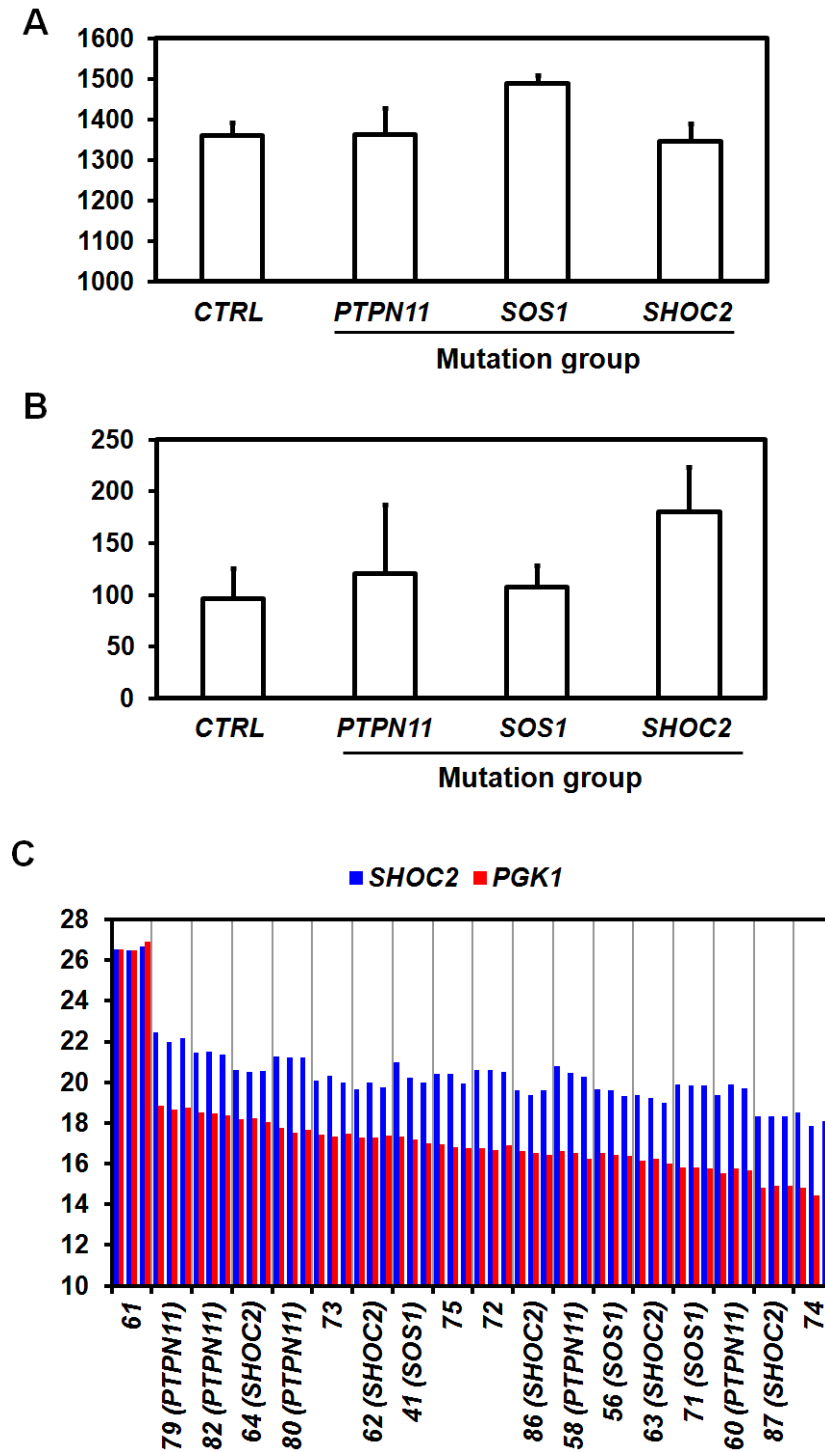

**Supp. Figure S2.** Expression levels in human PBMCs of *PTPN11*, *SOS1* and *SHOC2*. For *PTPN11* and *SOS1* (A, B), histograms represent average expression signal in our 49-sample human PBMC samples profiled with Illumina gene expression arrays. For *SHOC2*, quantitative realtime PCR triplicate Ct values are reported for *SHOC2* and the housekeeper *PGK1* in 18 PBMC samples chosen among controls, NS and NSL-LAH, as indicated.

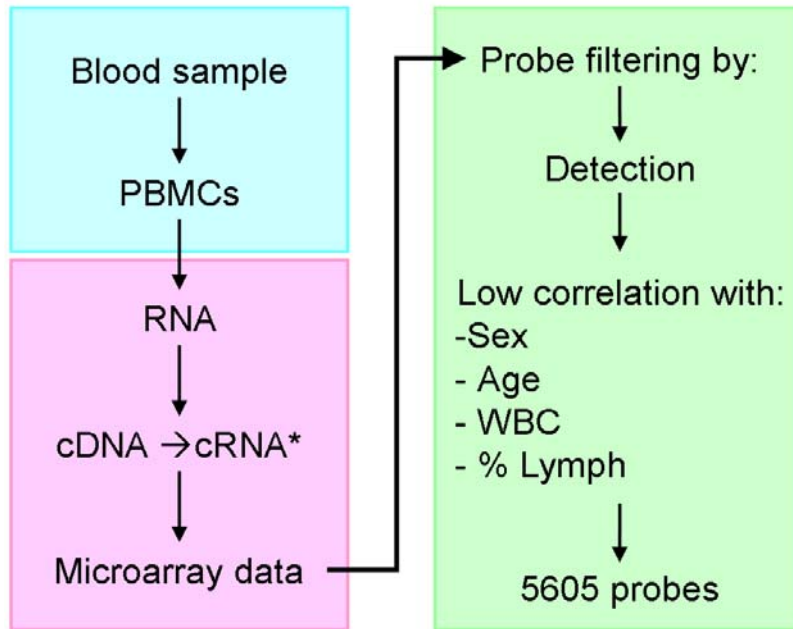

**Supp. Figure S3.** Experimental workflow for PBMC purification, expression profiling, and data filtering. The workflow is subdivided in three main parts: blood processing (light blue), RNA extraction and gene expression profiling (pink), and data processing for gene filtering (light green).

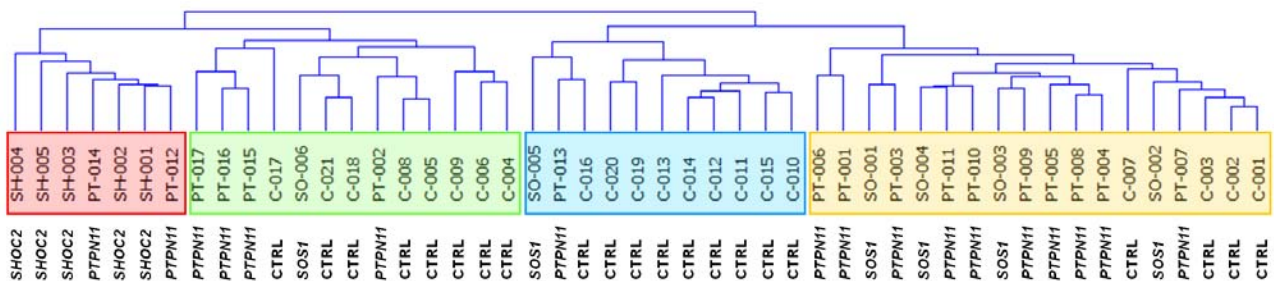

**Supp. Figure S4.** Unsupervised cluster analysis. Hierarchical clustering of PBMC samples from: (i) 21 control subjects (C-001-021), (ii) 17 NS patients with a *PTPN11* mutation (PT-001-017), (iii) 6 NS patients with a *SOS1* mutation (SO-001-006), and (iv) 6 NS/LAH patients with the *SHOC2* c.4A>G mutation (SH-001-005). Four major transcriptional clusters emerge, two of which are clearly enriched in *SHOC2* samples and *PTPN11* + *SOS1* samples, respectively.



**Supp. Tables**

| <b>Supp. Table S1. Genotypes of NS and NS/LAH patients</b> |               |                                |                                |
|------------------------------------------------------------|---------------|--------------------------------|--------------------------------|
| <b>Patient ID</b>                                          | <b>Gene</b>   | <b>Nucleotide substitution</b> | <b>Amino-acid substitution</b> |
| <b>PT-001</b>                                              | <i>PTPN11</i> | c.785T>G                       | p.Leu262Arg                    |
| <b>PT-002</b>                                              | <i>PTPN11</i> | c.1508G>A                      | p.Gly503Glu                    |
| <b>PT-003</b>                                              | <i>PTPN11</i> | c.923A>G                       | p.Asn308Ser                    |
| <b>PT-004</b>                                              | <i>PTPN11</i> | c.782T>A                       | p.Leu261His                    |
| <b>PT-005</b>                                              | <i>PTPN11</i> | c.1507G>A                      | p.Gly503Arg                    |
| <b>PT-006</b>                                              | <i>PTPN11</i> | c.782T>A                       | p.Leu261His                    |
| <b>PT-007</b>                                              | <i>PTPN11</i> | c.1510A>G                      | p.Met504Val                    |
| <b>PT-008</b>                                              | <i>PTPN11</i> | c.782T>A                       | p.Leu261His                    |
| <b>PT-009</b>                                              | <i>PTPN11</i> | c.853T>A                       | p.Phe285Ile                    |
| <b>PT-010</b>                                              | <i>PTPN11</i> | c.228G>C                       | p.Glu76Asp                     |
| <b>PT-011</b>                                              | <i>PTPN11</i> | c.181G>A                       | p.Asp61Asn                     |
| <b>PT-012</b>                                              | <i>PTPN11</i> | c.172A>G                       | p.Asn58Asp                     |
| <b>PT-013</b>                                              | <i>PTPN11</i> | c.417G>T                       | p.Glu139Asp                    |
| <b>PT-014</b>                                              | <i>PTPN11</i> | c.1510A>G                      | p.Met504Val                    |
| <b>PT-015</b>                                              | <i>PTPN11</i> | c.922A>G                       | p.Asn308Asp                    |
| <b>PT-016</b>                                              | <i>PTPN11</i> | c.172A>C                       | p.Asn58His                     |
| <b>PT-017</b>                                              | <i>PTPN11</i> | c.188A>G                       | p.Tyr63Cys                     |
| <b>SO-001</b>                                              | <i>SOS1</i>   | c.755T>C                       | p.Ile252Thr                    |

|               |              |           |             |
|---------------|--------------|-----------|-------------|
| <b>SO-002</b> | <i>SOS1</i>  | c.797C>A  | p.Thr266Lys |
| <b>SO-003</b> | <i>SOS1</i>  | c.806T>C  | p.Met269Thr |
| <b>SO-004</b> | <i>SOS1</i>  | c.806T>C  | p.Met269Thr |
| <b>SO-005</b> | <i>SOS1</i>  | c.1654A>G | p.Arg552Gly |
| <b>SO-006</b> | <i>SOS1</i>  | c.1297G>A | p.Glu433Lys |
| <b>SH-001</b> | <i>SHOC2</i> | c.4A>G    | p.Ser2Gly   |
| <b>SH-002</b> | <i>SHOC2</i> | c.4A>G    | p.Ser2Gly   |
| <b>SH-003</b> | <i>SHOC2</i> | c.4A>G    | p.Ser2Gly   |
| <b>SH-004</b> | <i>SHOC2</i> | c.4A>G    | p.Ser2Gly   |
| <b>SH-005</b> | <i>SHOC2</i> | c.4A>G    | p.Ser2Gly   |

GenBank reference sequences:

*PTPN11*: NM\_002834.3; *SOS1*: NM\_005633.3; *SHOC2*: NM\_007373.3

Nucleotide numbering reflects cDNA numbering with +1 corresponding to the A of the ATG translation initiation codon in the reference sequence.

| <b>Supp. Table S2A. NS-NS/LAH signature<br/>(125 probes, 124 genes)</b> |                 |                  |                             |                                 |                                                  |
|-------------------------------------------------------------------------|-----------------|------------------|-----------------------------|---------------------------------|--------------------------------------------------|
| <b>Symbol</b>                                                           | <b>TargetID</b> | <b>Accession</b> | <b>L2R<br/>Disease/CTRL</b> | <b>ABS SNR<br/>Disease/CTRL</b> | <b>T-test p-value<br/>Disease vs<br/>Control</b> |
| <i>NCF1</i>                                                             | ILMN_136961     | NM_000265.1      | 1.321084166                 | 0.554650871                     | 0.00055653                                       |
| <i>ECGF1</i>                                                            | ILMN_18760      | NM_001953.2      | 1.139301768                 | 0.56287464                      | 0.00044382                                       |
| <i>CGI-38</i>                                                           | ILMN_754        | NM_015964.2      | 1.132573662                 | 0.673556676                     | 0.00002621                                       |
| <i>FGL2</i>                                                             | ILMN_19861      | NM_006682.1      | 1.070279843                 | 0.57143162                      | 0.00028665                                       |
| <i>RAPGEF1</i>                                                          | ILMN_3184       | NM_198679.1      | 0.98206944                  | 0.561509994                     | 0.00105147                                       |
| <i>GRN</i>                                                              | ILMN_18655      | NM_002087.2      | 0.964791405                 | 0.568916029                     | 0.00045024                                       |
| <i>SASH1</i>                                                            | ILMN_22260      | NM_015278.3      | 0.957600681                 | 0.686162499                     | 0.00002612                                       |
| <i>RP2</i>                                                              | ILMN_28618      | NM_006915.1      | 0.90480327                  | 0.791543608                     | 0.00000200                                       |
| <i>TUBB6</i>                                                            | ILMN_26276      | NM_032525.1      | 0.853006817                 | 0.527954118                     | 0.00057275                                       |
| <i>SLC25A24</i>                                                         | ILMN_15753      | NM_013386.2      | 0.837217818                 | 0.860356608                     | 0.00000062                                       |
| <i>MTMR11</i>                                                           | ILMN_137079     | NM_181873.1      | 0.808285699                 | 0.655443175                     | 0.00003297                                       |
| <i>PFC</i>                                                              | ILMN_24742      | NM_002621.1      | 0.791994208                 | 0.504731573                     | 0.00101265                                       |
| <i>CSF1R</i>                                                            | ILMN_24980      | NM_005211.2      | 0.766481286                 | 0.566002268                     | 0.00026247                                       |
| <i>CYBB</i>                                                             | ILMN_13274      | NM_000397.2      | 0.751730075                 | 0.630439746                     | 0.00010382                                       |
| <i>WARS</i>                                                             | ILMN_25430      | NM_213646.1      | 0.749824997                 | 0.533953615                     | 0.00061560                                       |
| <i>C9orf72</i>                                                          | ILMN_9580       | NM_145005.3      | 0.730448006                 | 0.576732623                     | 0.00021012                                       |
| <i>LOC339745</i>                                                        | ILMN_21364      | NM_001001664.1   | 0.725297986                 | 0.847062003                     | 0.00000035                                       |
| <i>MSR1</i>                                                             | ILMN_16779      | NM_002445.2      | 0.709933122                 | 0.527357886                     | 0.00089285                                       |
| <i>WDR33</i>                                                            | ILMN_6704       | NM_001006623.1   | 0.69789313                  | 0.557560131                     | 0.00076950                                       |
| <i>RB1</i>                                                              | ILMN_4636       | NM_000321.1      | 0.688171798                 | 0.609960242                     | 0.00009345                                       |
| <i>ADAM9</i>                                                            | ILMN_922        | NM_003816.2      | 0.673507261                 | 0.559339882                     | 0.00103667                                       |
| <i>P2RX1</i>                                                            | ILMN_1134       | NM_002558.2      | 0.667173036                 | 0.582373311                     | 0.00018210                                       |
| <i>TBC1D9</i>                                                           | ILMN_25527      | NM_015130.1      | 0.661083435                 | 0.533359533                     | 0.00052298                                       |
| <i>MCTP1</i>                                                            | ILMN_2499       | NM_001002796.1   | 0.657310261                 | 0.552273564                     | 0.00037623                                       |

|                 |                    |                    |                     |                    |                   |
|-----------------|--------------------|--------------------|---------------------|--------------------|-------------------|
| <b>VMO1</b>     | <b>ILMN_18899</b>  | <b>NM_182566.1</b> | <b>0.643428254</b>  | <b>0.539386685</b> | <b>0.00102405</b> |
| <b>EMR1</b>     | <b>ILMN_12984</b>  | <b>NM_001974.3</b> | <b>0.633183529</b>  | <b>0.557693009</b> | <b>0.00036571</b> |
| <b>PRDX3</b>    | <b>ILMN_13029</b>  | <b>NM_014098.2</b> | <b>0.626217596</b>  | <b>0.616369174</b> | <b>0.00020419</b> |
| <b>MTSS1</b>    | <b>ILMN_7083</b>   | <b>NM_014751.2</b> | <b>0.624826288</b>  | <b>0.717204372</b> | <b>0.00000989</b> |
| <b>PECAM1</b>   | <b>ILMN_7862</b>   | <b>NM_000442.2</b> | <b>0.623438681</b>  | <b>0.532080738</b> | <b>0.00072899</b> |
| <b>SSFA2</b>    | <b>ILMN_4525</b>   | <b>NM_006751.3</b> | <b>0.605800152</b>  | <b>0.545007535</b> | <b>0.00050355</b> |
| <b>CTDSP1</b>   | <b>ILMN_13739</b>  | <b>NM_182642.1</b> | <b>0.60301904</b>   | <b>0.540296413</b> | <b>0.00043850</b> |
| <b>MLL3</b>     | <b>ILMN_24027</b>  | <b>NM_021230.1</b> | <b>0.595752173</b>  | <b>0.50418616</b>  | <b>0.00094331</b> |
| <b>ATP6V0A1</b> | <b>ILMN_138088</b> | <b>NM_005177.2</b> | <b>0.56619738</b>   | <b>0.618763559</b> | <b>0.00007647</b> |
| <b>CST6</b>     | <b>ILMN_20022</b>  | <b>NM_001323.2</b> | <b>0.565753462</b>  | <b>0.534088911</b> | <b>0.00194061</b> |
| <b>DPYSL2</b>   | <b>ILMN_9671</b>   | <b>NM_001386.4</b> | <b>0.565577205</b>  | <b>0.517590614</b> | <b>0.00081030</b> |
| <b>LOC51136</b> | <b>ILMN_27239</b>  | <b>NM_016125.2</b> | <b>0.55785882</b>   | <b>0.524110701</b> | <b>0.00070125</b> |
| <b>SYK</b>      | <b>ILMN_8126</b>   | <b>NM_003177.3</b> | <b>0.557306354</b>  | <b>0.508150751</b> | <b>0.00100071</b> |
| <b>RNPEP</b>    | <b>ILMN_22895</b>  | <b>NM_020216.3</b> | <b>0.55610558</b>   | <b>0.598623524</b> | <b>0.00016502</b> |
| <b>ATP6V1A</b>  | <b>ILMN_30226</b>  | <b>NM_001690.2</b> | <b>0.550949418</b>  | <b>0.573954134</b> | <b>0.00026355</b> |
| <b>MLL3</b>     | <b>ILMN_14020</b>  | <b>NM_170606.1</b> | <b>0.549391752</b>  | <b>0.548625483</b> | <b>0.00041986</b> |
| <b>QKI</b>      | <b>ILMN_4124</b>   | <b>NM_206854.1</b> | <b>0.545749725</b>  | <b>0.53359302</b>  | <b>0.00053097</b> |
| <b>HLA-DMB</b>  | <b>ILMN_2252</b>   | <b>NM_002118.3</b> | <b>0.541171517</b>  | <b>0.741714584</b> | <b>0.00000443</b> |
| <b>UTRN</b>     | <b>ILMN_15375</b>  | <b>NM_007124.1</b> | <b>0.527936565</b>  | <b>0.626744433</b> | <b>0.00008486</b> |
| <b>AGPAT2</b>   | <b>ILMN_6967</b>   | <b>NM_006412.3</b> | <b>0.526089017</b>  | <b>0.537277823</b> | <b>0.00107744</b> |
| <b>SLC36A1</b>  | <b>ILMN_22384</b>  | <b>NM_078483.2</b> | <b>0.525363533</b>  | <b>0.579074576</b> | <b>0.00018789</b> |
| <b>WDFY2</b>    | <b>ILMN_14243</b>  | <b>NM_052950.2</b> | <b>0.51738607</b>   | <b>0.949471314</b> | <b>0.00000014</b> |
| <b>SNX2</b>     | <b>ILMN_4948</b>   | <b>NM_003100.2</b> | <b>0.511419645</b>  | <b>0.645587156</b> | <b>0.00004356</b> |
| <b>POGZ</b>     | <b>ILMN_14081</b>  | <b>NM_145796.2</b> | <b>0.509196883</b>  | <b>0.614652705</b> | <b>0.00034779</b> |
| <b>CBR3</b>     | <b>ILMN_8256</b>   | <b>NM_001236.3</b> | <b>-0.501548372</b> | <b>0.576774225</b> | <b>0.00031293</b> |
| <b>ACOT4</b>    | <b>ILMN_5812</b>   | <b>NM_152331.2</b> | <b>-0.506300623</b> | <b>0.501282601</b> | <b>0.00145993</b> |
| <b>ZNF545</b>   | <b>ILMN_15084</b>  | <b>NM_133466.1</b> | <b>-0.50676991</b>  | <b>0.666747897</b> | <b>0.00004604</b> |
| <b>ARHGAP10</b> | <b>ILMN_24582</b>  | <b>NM_024605.3</b> | <b>-0.507674999</b> | <b>0.658071995</b> | <b>0.00003942</b> |
| <b>ATXN7L2</b>  | <b>ILMN_6796</b>   | <b>NM_153340.2</b> | <b>-0.509429145</b> | <b>0.506309516</b> | <b>0.00116308</b> |

|                 |             |                |              |             |            |
|-----------------|-------------|----------------|--------------|-------------|------------|
| <b>PIP5K2A</b>  | ILMN_6957   | NM_005028.3    | -0.511620973 | 0.766986504 | 0.00000303 |
| <b>BRF2</b>     | ILMN_2966   | NM_018310.2    | -0.513168419 | 0.573735878 | 0.00022956 |
| <b>LAX1</b>     | ILMN_29004  | NM_017773.2    | -0.520792925 | 0.715075083 | 0.00001090 |
| <b>PTGER4</b>   | ILMN_13328  | NM_000958.2    | -0.532099462 | 0.562488851 | 0.00039290 |
| <b>C21orf57</b> | ILMN_21121  | NM_058181.1    | -0.532614088 | 0.557683419 | 0.00039802 |
| <b>CCDC58</b>   | ILMN_27140  | NM_001017928.2 | -0.54006179  | 0.626422203 | 0.00008076 |
| <b>ALDOC</b>    | ILMN_15767  | NM_005165.2    | -0.551121983 | 0.599294042 | 0.00013341 |
| <b>SDCCAG33</b> | ILMN_138968 | NM_005786.3    | -0.55159881  | 0.635549907 | 0.00012881 |
| <b>FAM84B</b>   | ILMN_7137   | NM_174911.3    | -0.555973314 | 0.66943369  | 0.00004156 |
| <b>SLC25A23</b> | ILMN_5925   | NM_024103.2    | -0.564123021 | 0.656348275 | 0.00011161 |
| <b>NPDC1</b>    | ILMN_5190   | NM_015392.2    | -0.566353596 | 0.51503047  | 0.00078580 |
| <b>FYN</b>      | ILMN_5919   | NM_002037.3    | -0.570318002 | 0.644773866 | 0.00004925 |
| <b>RHOF</b>     | ILMN_1762   | NM_019034.2    | -0.588562031 | 0.512472435 | 0.00087113 |
| <b>LCMT2</b>    | ILMN_7283   | NM_014793.3    | -0.59408272  | 0.676237692 | 0.00004917 |
| <b>LPHN1</b>    | ILMN_12017  | NM_014921.3    | -0.595977927 | 0.555516456 | 0.00060169 |
| <b>ACACB</b>    | ILMN_3318   | NM_001093.2    | -0.60148083  | 0.647708036 | 0.00004546 |
| <b>PIM2</b>     | ILMN_27932  | NM_006875.2    | -0.606699437 | 0.745720347 | 0.00000688 |
| <b>RASA3</b>    | ILMN_19501  | NM_007368.2    | -0.609728339 | 0.51866888  | 0.00084582 |
| <b>CD2</b>      | ILMN_6738   | NM_001767.2    | -0.613600011 | 0.646691342 | 0.00006305 |
| <b>MGC17330</b> | ILMN_15026  | NM_052880.3    | -0.615102387 | 0.554114679 | 0.00124969 |
| <b>PITPNC1</b>  | ILMN_12660  | NM_181671.1    | -0.617188651 | 0.763012992 | 0.00000348 |
| <b>IL18RAP</b>  | ILMN_16084  | NM_003853.2    | -0.618785163 | 0.595867225 | 0.00013053 |
| <b>ABHD14B</b>  | ILMN_24812  | NM_032750.1    | -0.620384302 | 0.753596144 | 0.00000525 |
| <b>TNFSF9</b>   | ILMN_18030  | NM_003811.2    | -0.63645865  | 0.504502625 | 0.00123920 |
| <b>GFI1</b>     | ILMN_30079  | NM_005263.2    | -0.638218337 | 0.810063077 | 0.00000130 |
| <b>ZBTB16</b>   | ILMN_11903  | NM_006006.4    | -0.640383593 | 0.523059876 | 0.00068922 |
| <b>STAT4</b>    | ILMN_8937   | NM_003151.2    | -0.642277435 | 0.741700081 | 0.00000514 |
| <b>SMPD1</b>    | ILMN_8257   | NM_001007593.1 | -0.648648924 | 0.538651833 | 0.00047990 |
| <b>SFXN1</b>    | ILMN_16398  | NM_022754.4    | -0.654170933 | 0.523626325 | 0.00080819 |

|                 |                    |                       |                     |                    |                   |
|-----------------|--------------------|-----------------------|---------------------|--------------------|-------------------|
| <b>TCEA3</b>    | <b>ILMN_27218</b>  | <b>NM_003196.1</b>    | <b>-0.657704996</b> | <b>0.592066255</b> | <b>0.00024669</b> |
| <b>CD8A</b>     | <b>ILMN_2358</b>   | <b>NM_001768.4</b>    | <b>-0.660860793</b> | <b>0.594696025</b> | <b>0.00014620</b> |
| <b>PRR7</b>     | <b>ILMN_17178</b>  | <b>NM_030567.2</b>    | <b>-0.665158852</b> | <b>0.536832382</b> | <b>0.00057470</b> |
| <b>C10orf35</b> | <b>ILMN_13661</b>  | <b>NM_145306.1</b>    | <b>-0.669357423</b> | <b>0.58713647</b>  | <b>0.00016046</b> |
| <b>PLCG1</b>    | <b>ILMN_3773</b>   | <b>NM_002660.2</b>    | <b>-0.669392435</b> | <b>0.584297133</b> | <b>0.00019981</b> |
| <b>PAFAH2</b>   | <b>ILMN_3410</b>   | <b>NM_000437.2</b>    | <b>-0.684827426</b> | <b>0.892782604</b> | <b>0.00000055</b> |
| <b>CACNA2D2</b> | <b>ILMN_15989</b>  | <b>NM_001005505.1</b> | <b>-0.686912394</b> | <b>0.613426228</b> | <b>0.00010529</b> |
| <b>ITK</b>      | <b>ILMN_23317</b>  | <b>NM_005546.3</b>    | <b>-0.690033069</b> | <b>0.704824671</b> | <b>0.00002724</b> |
| <b>MGAT4A</b>   | <b>ILMN_139237</b> | <b>NM_012214.1</b>    | <b>-0.701476401</b> | <b>0.588282515</b> | <b>0.00018484</b> |
| <b>TGFBR3</b>   | <b>ILMN_22620</b>  | <b>NM_003243.2</b>    | <b>-0.708248557</b> | <b>0.697370522</b> | <b>0.00002515</b> |
| <b>CD3E</b>     | <b>ILMN_24240</b>  | <b>NM_000733.2</b>    | <b>-0.711671939</b> | <b>0.629082883</b> | <b>0.00008905</b> |
| <b>TKTL1</b>    | <b>ILMN_23315</b>  | <b>NM_012253.2</b>    | <b>-0.727727687</b> | <b>0.605461651</b> | <b>0.00018975</b> |
| <b>HOXB2</b>    | <b>ILMN_137588</b> | <b>NM_002145.2</b>    | <b>-0.739430194</b> | <b>0.551939309</b> | <b>0.00033964</b> |
| <b>ICOS</b>     | <b>ILMN_9996</b>   | <b>NM_012092.2</b>    | <b>-0.745024028</b> | <b>0.513242042</b> | <b>0.00083515</b> |
| <b>CTLA4</b>    | <b>ILMN_138103</b> | <b>NM_005214.2</b>    | <b>-0.750478694</b> | <b>0.934673244</b> | <b>0.00000008</b> |
| <b>PTPRM</b>    | <b>ILMN_19957</b>  | <b>NM_002845.2</b>    | <b>-0.752842383</b> | <b>0.636816195</b> | <b>0.00006099</b> |
| <b>FHIT</b>     | <b>ILMN_15082</b>  | <b>NM_002012.1</b>    | <b>-0.766674862</b> | <b>0.578811154</b> | <b>0.00046674</b> |
| <b>TSEN54</b>   | <b>ILMN_8569</b>   | <b>NM_207346.1</b>    | <b>-0.776875745</b> | <b>0.599435131</b> | <b>0.00011930</b> |
| <b>PDZD4</b>    | <b>ILMN_3986</b>   | <b>NM_032512.2</b>    | <b>-0.777079223</b> | <b>0.603890033</b> | <b>0.00011783</b> |
| <b>ELA1</b>     | <b>ILMN_24603</b>  | <b>NM_001971.4</b>    | <b>-0.778277484</b> | <b>0.725031145</b> | <b>0.00000665</b> |
| <b>CD5</b>      | <b>ILMN_29547</b>  | <b>NM_014207.2</b>    | <b>-0.780011452</b> | <b>0.501385904</b> | <b>0.00123187</b> |
| <b>FLT3LG</b>   | <b>ILMN_4754</b>   | <b>NM_001459.2</b>    | <b>-0.786977344</b> | <b>0.672271482</b> | <b>0.00002435</b> |
| <b>PPP2R2B</b>  | <b>ILMN_1007</b>   | <b>NM_181676.1</b>    | <b>-0.790685672</b> | <b>0.615737601</b> | <b>0.00012564</b> |
| <b>TARP</b>     | <b>ILMN_25716</b>  | <b>NM_001003799.1</b> | <b>-0.793277751</b> | <b>0.64274719</b>  | <b>0.00006665</b> |
| <b>BCL9L</b>    | <b>ILMN_27555</b>  | <b>NM_182557.1</b>    | <b>-0.808789234</b> | <b>0.554059637</b> | <b>0.00032290</b> |
| <b>SOCS1</b>    | <b>ILMN_3038</b>   | <b>NM_003745.1</b>    | <b>-0.825203535</b> | <b>0.502522482</b> | <b>0.00114042</b> |
| <b>CCDC65</b>   | <b>ILMN_22276</b>  | <b>NM_033124.2</b>    | <b>-0.826315503</b> | <b>0.575384317</b> | <b>0.00020769</b> |
| <b>BAMBI</b>    | <b>ILMN_8469</b>   | <b>NM_012342.2</b>    | <b>-0.828451265</b> | <b>0.502263163</b> | <b>0.00097632</b> |
| <b>PLEKHB1</b>  | <b>ILMN_2859</b>   | <b>NM_021200.1</b>    | <b>-0.840020952</b> | <b>0.839629344</b> | <b>0.00000093</b> |

|                        |                   |                    |                     |                    |                   |
|------------------------|-------------------|--------------------|---------------------|--------------------|-------------------|
| <b><i>C6orf105</i></b> | <b>ILMN_10287</b> | <b>NM_032744.1</b> | <b>-0.840919329</b> | <b>0.664422571</b> | <b>0.00003018</b> |
| <b><i>KSP37</i></b>    | <b>ILMN_16684</b> | <b>NM_031950.2</b> | <b>-0.842708345</b> | <b>0.681807509</b> | <b>0.00002272</b> |
| <b><i>GZMH</i></b>     | <b>ILMN_10239</b> | <b>NM_033423.2</b> | <b>-0.845233571</b> | <b>0.527411198</b> | <b>0.00086217</b> |
| <b><i>ADRB2</i></b>    | <b>ILMN_2022</b>  | <b>NM_000024.3</b> | <b>-0.86626972</b>  | <b>0.847589262</b> | <b>0.00000084</b> |
| <b><i>MAL</i></b>      | <b>ILMN_3411</b>  | <b>NM_002371.2</b> | <b>-0.877719549</b> | <b>0.925808311</b> | <b>0.00000027</b> |
| <b><i>CITED4</i></b>   | <b>ILMN_15271</b> | <b>NM_133467.2</b> | <b>-0.880279922</b> | <b>0.765096915</b> | <b>0.00000907</b> |
| <b><i>PTGDS</i></b>    | <b>ILMN_19248</b> | <b>NM_000954.5</b> | <b>-0.885287037</b> | <b>0.505533305</b> | <b>0.00172082</b> |
| <b><i>AKR1C3</i></b>   | <b>ILMN_11871</b> | <b>NM_003739.4</b> | <b>-0.93749951</b>  | <b>0.627865296</b> | <b>0.00008072</b> |
| <b><i>H2AFX</i></b>    | <b>ILMN_23585</b> | <b>NM_002105.2</b> | <b>-0.942415472</b> | <b>0.813438146</b> | <b>0.00000080</b> |
| <b><i>FEZ1</i></b>     | <b>ILMN_28992</b> | <b>NM_005103.3</b> | <b>-1.016084362</b> | <b>0.763414541</b> | <b>0.00000304</b> |
| <b><i>ZNF683</i></b>   | <b>ILMN_2307</b>  | <b>NM_173574.1</b> | <b>-1.017805442</b> | <b>0.562264358</b> | <b>0.00032947</b> |
| <b><i>IL23A</i></b>    | <b>ILMN_20797</b> | <b>NM_016584.2</b> | <b>-1.054966924</b> | <b>0.588923763</b> | <b>0.00017724</b> |
| <b><i>GPLY</i></b>     | <b>ILMN_13145</b> | <b>NM_012483.1</b> | <b>-1.061532661</b> | <b>0.821905939</b> | <b>0.00000159</b> |
| <b><i>BATF</i></b>     | <b>ILMN_3307</b>  | <b>NM_006399.2</b> | <b>-1.12180425</b>  | <b>0.519569456</b> | <b>0.00075257</b> |

| <b>Supp. Table S2B. <i>PTPN11</i> signature<br/>(225 probes, 223 genes)</b> |                 |                  |                             |                                 |                                                       |
|-----------------------------------------------------------------------------|-----------------|------------------|-----------------------------|---------------------------------|-------------------------------------------------------|
| <b>Symbol</b>                                                               | <b>TargetID</b> | <b>Accession</b> | <b>L2R<br/>Disease/CTRL</b> | <b>ABS SNR<br/>Disease/CTRL</b> | <b>T-test p-<br/>value<br/>Disease vs<br/>Control</b> |
| <i>HCA112</i>                                                               | ILMN_24990      | NM_018487.2      | 1.640572025                 | 0.46899836                      | 0.00045873                                            |
| <i>EMP1</i>                                                                 | ILMN_25097      | NM_001423.1      | 1.573890651                 | 0.30682888                      | 0.00314480                                            |
| <i>TNFRSF12A</i>                                                            | ILMN_11654      | NM_016639.1      | 1.471344009                 | 0.327517025                     | 0.00230098                                            |
| <i>RAPGEF1</i>                                                              | ILMN_3184       | NM_198679.1      | 1.350848899                 | 0.561509994                     | 0.00002477                                            |
| <i>CGI-38</i>                                                               | ILMN_754        | NM_015964.2      | 1.26429885                  | 0.673556676                     | 0.00001957                                            |
| <i>EGR2</i>                                                                 | ILMN_10721      | NM_000399.2      | 1.25189554                  | 0.216246616                     | 0.00078760                                            |
| <i>ECGF1</i>                                                                | ILMN_18760      | NM_001953.2      | 1.227244131                 | 0.56287464                      | 0.00025184                                            |
| <i>VASH1</i>                                                                | ILMN_4905       | NM_014909.2      | 1.187049881                 | 0.436937865                     | 0.00009345                                            |
| <i>NCF1</i>                                                                 | ILMN_136961     | NM_000265.1      | 1.183170469                 | 0.554650871                     | 0.00215972                                            |
| <i>C1QA</i>                                                                 | ILMN_138176     | NM_015991.1      | 1.174230265                 | 0.460228509                     | 0.00038154                                            |
| <i>LILRA5</i>                                                               | ILMN_13562      | NM_181986.1      | 1.157891702                 | 0.495486116                     | 0.00025816                                            |
| <i>FGL2</i>                                                                 | ILMN_19861      | NM_006682.1      | 1.117058744                 | 0.57143162                      | 0.00016718                                            |
| <i>HBEGF</i>                                                                | ILMN_13020      | NM_001945.1      | 1.103141795                 | 0.251961923                     | 0.00140005                                            |
| <i>OSCAR</i>                                                                | ILMN_3784       | NM_130771.2      | 1.064976797                 | 0.450026773                     | 0.00017363                                            |
| <i>PTRF</i>                                                                 | ILMN_22301      | NM_012232.2      | 1.049816639                 | 0.426525135                     | 0.00301579                                            |
| <i>CD300LB</i>                                                              | ILMN_22665      | NM_174892.1      | 1.029237831                 | 0.417482967                     | 0.00014046                                            |
| <i>NP</i>                                                                   | ILMN_18063      | NM_000270.1      | 1.004914876                 | 0.450327209                     | 0.00137933                                            |
| <i>BTBD14A</i>                                                              | ILMN_10561      | NM_144653.3      | 0.977900069                 | 0.497255735                     | 0.00000093                                            |
| <i>SERPINE1</i>                                                             | ILMN_6244       | NM_000602.1      | 0.976345257                 | 0.398119074                     | 0.00471708                                            |
| <i>GRN</i>                                                                  | ILMN_18655      | NM_002087.2      | 0.971879492                 | 0.568916029                     | 0.00009629                                            |
| <i>SASH1</i>                                                                | ILMN_22260      | NM_015278.3      | 0.968150053                 | 0.686162499                     | 0.00002487                                            |
| <i>TUBB6</i>                                                                | ILMN_26276      | NM_032525.1      | 0.957340349                 | 0.527954118                     | 0.00134300                                            |



|                  |                    |                       |                    |                    |                   |
|------------------|--------------------|-----------------------|--------------------|--------------------|-------------------|
| <b>WARS</b>      | <b>ILMN_25430</b>  | <b>NM_213646.1</b>    | <b>0.928591613</b> | <b>0.533953615</b> | <b>0.00019458</b> |
| <b>RP2</b>       | <b>ILMN_28618</b>  | <b>NM_006915.1</b>    | <b>0.917224311</b> | <b>0.791543608</b> | <b>0.00000945</b> |
| <b>C9orf72</b>   | <b>ILMN_9580</b>   | <b>NM_145005.3</b>    | <b>0.913617277</b> | <b>0.576732623</b> | <b>0.00002725</b> |
| <b>ALDH3B1</b>   | <b>ILMN_26797</b>  | <b>NM_001030010.1</b> | <b>0.901692076</b> | <b>0.482841759</b> | <b>0.00018900</b> |
| <b>ADAM9</b>     | <b>ILMN_922</b>    | <b>NM_003816.2</b>    | <b>0.893136784</b> | <b>0.559339882</b> | <b>0.00015938</b> |
| <b>LOC401233</b> | <b>ILMN_17894</b>  | <b>NM_001013680.1</b> | <b>0.892889063</b> | <b>0.394707704</b> | <b>0.00145884</b> |
| <b>MTMR11</b>    | <b>ILMN_137079</b> | <b>NM_181873.1</b>    | <b>0.883969064</b> | <b>0.655443175</b> | <b>0.00006313</b> |
| <b>MSR1</b>      | <b>ILMN_16779</b>  | <b>NM_002445.2</b>    | <b>0.883563599</b> | <b>0.527357886</b> | <b>0.00094744</b> |
| <b>CSF1R</b>     | <b>ILMN_24980</b>  | <b>NM_005211.2</b>    | <b>0.864191294</b> | <b>0.566002268</b> | <b>0.00038381</b> |
| <b>PFC</b>       | <b>ILMN_24742</b>  | <b>NM_002621.1</b>    | <b>0.845059664</b> | <b>0.504731573</b> | <b>0.00056782</b> |
| <b>UNQ3033</b>   | <b>ILMN_29051</b>  | <b>NM_198481.1</b>    | <b>0.837564175</b> | <b>0.313324062</b> | <b>0.00308231</b> |
| <b>CYBB</b>      | <b>ILMN_13274</b>  | <b>NM_000397.2</b>    | <b>0.832261527</b> | <b>0.630439746</b> | <b>0.00001732</b> |
| <b>P2RX1</b>     | <b>ILMN_1134</b>   | <b>NM_002558.2</b>    | <b>0.830035069</b> | <b>0.582373311</b> | <b>0.00009607</b> |
| <b>WDR33</b>     | <b>ILMN_6704</b>   | <b>NM_001006623.1</b> | <b>0.816852502</b> | <b>0.557560131</b> | <b>0.00038434</b> |
| <b>CST6</b>      | <b>ILMN_20022</b>  | <b>NM_001323.2</b>    | <b>0.807324519</b> | <b>0.534088911</b> | <b>0.00007649</b> |
| <b>ZNF503</b>    | <b>ILMN_2048</b>   | <b>NM_032772.3</b>    | <b>0.805381467</b> | <b>0.432169646</b> | <b>0.00091319</b> |
| <b>LIMS1</b>     | <b>ILMN_11207</b>  | <b>NM_004987.3</b>    | <b>0.800923571</b> | <b>0.336151079</b> | <b>0.00198880</b> |
| <b>VMO1</b>      | <b>ILMN_18899</b>  | <b>NM_182566.1</b>    | <b>0.785342972</b> | <b>0.539386685</b> | <b>0.00027633</b> |
| <b>ANKDD1A</b>   | <b>ILMN_6117</b>   | <b>NM_182703.2</b>    | <b>0.781657454</b> | <b>0.356691847</b> | <b>0.00079619</b> |
| <b>CAMK1</b>     | <b>ILMN_21373</b>  | <b>NM_003656.3</b>    | <b>0.759144587</b> | <b>0.492115675</b> | <b>0.00061577</b> |
| <b>APLP2</b>     | <b>ILMN_19935</b>  | <b>NM_001642.1</b>    | <b>0.752003991</b> | <b>0.455656335</b> | <b>0.00215605</b> |
| <b>ZDHHC1</b>    | <b>ILMN_29630</b>  | <b>NM_013304.1</b>    | <b>0.751814563</b> | <b>0.488268233</b> | <b>0.00134316</b> |
| <b>SLC25A24</b>  | <b>ILMN_15753</b>  | <b>NM_013386.2</b>    | <b>0.74510769</b>  | <b>0.860356608</b> | <b>0.00000472</b> |
| <b>IL1RAP</b>    | <b>ILMN_8626</b>   | <b>NM_134470.2</b>    | <b>0.728393523</b> | <b>0.398730293</b> | <b>0.00112381</b> |
| <b>IGSF6</b>     | <b>ILMN_7979</b>   | <b>NM_005849.1</b>    | <b>0.722354415</b> | <b>0.404621481</b> | <b>0.00184215</b> |
| <b>MLL3</b>      | <b>ILMN_24027</b>  | <b>NM_021230.1</b>    | <b>0.707646583</b> | <b>0.50418616</b>  | <b>0.00089322</b> |
| <b>SSFA2</b>     | <b>ILMN_4525</b>   | <b>NM_006751.3</b>    | <b>0.704568057</b> | <b>0.545007535</b> | <b>0.00009856</b> |
| <b>LOC339745</b> | <b>ILMN_21364</b>  | <b>NM_001001664.1</b> | <b>0.700391983</b> | <b>0.847062003</b> | <b>0.00001529</b> |
| <b>QKI</b>       | <b>ILMN_4124</b>   | <b>NM_206854.1</b>    | <b>0.691646151</b> | <b>0.53359302</b>  | <b>0.00016360</b> |

|                 |                    |                       |                    |                    |                   |
|-----------------|--------------------|-----------------------|--------------------|--------------------|-------------------|
| <b>PLEKHQ1</b>  | <b>ILMN_25713</b>  | <b>NM_025201.3</b>    | <b>0.68445947</b>  | <b>0.381013076</b> | <b>0.00203275</b> |
| <b>TGM2</b>     | <b>ILMN_8134</b>   | <b>NM_198951.1</b>    | <b>0.682066115</b> | <b>0.417835214</b> | <b>0.00021976</b> |
| <b>ARRDC4</b>   | <b>ILMN_11014</b>  | <b>NM_183376.1</b>    | <b>0.672533706</b> | <b>0.417237908</b> | <b>0.00456098</b> |
| <b>FGR</b>      | <b>ILMN_21930</b>  | <b>NM_005248.1</b>    | <b>0.669375621</b> | <b>0.466533807</b> | <b>0.00161083</b> |
| <b>RGS12</b>    | <b>ILMN_15717</b>  | <b>NM_002926.2</b>    | <b>0.667379422</b> | <b>0.456153285</b> | <b>0.00063938</b> |
| <b>RNPEP</b>    | <b>ILMN_22895</b>  | <b>NM_020216.3</b>    | <b>0.666137061</b> | <b>0.598623524</b> | <b>0.00000576</b> |
| <b>SH2D3C</b>   | <b>ILMN_8703</b>   | <b>NM_170600.1</b>    | <b>0.665808955</b> | <b>0.403944385</b> | <b>0.00567878</b> |
| <b>SYK</b>      | <b>ILMN_8126</b>   | <b>NM_003177.3</b>    | <b>0.6626873</b>   | <b>0.508150751</b> | <b>0.00016720</b> |
| <b>ATP6V0A1</b> | <b>ILMN_138088</b> | <b>NM_005177.2</b>    | <b>0.652003802</b> | <b>0.618763559</b> | <b>0.00017335</b> |
| <b>KIAA0513</b> | <b>ILMN_21473</b>  | <b>NM_014732.2</b>    | <b>0.646910539</b> | <b>0.482625046</b> | <b>0.00007375</b> |
| <b>POGZ</b>     | <b>ILMN_14081</b>  | <b>NM_145796.2</b>    | <b>0.638240534</b> | <b>0.614652705</b> | <b>0.00002428</b> |
| <b>MCTP1</b>    | <b>ILMN_2499</b>   | <b>NM_001002796.1</b> | <b>0.631772234</b> | <b>0.552273564</b> | <b>0.00088773</b> |
| <b>GBGT1</b>    | <b>ILMN_18833</b>  | <b>NM_021996.3</b>    | <b>0.621287266</b> | <b>0.423734301</b> | <b>0.00332459</b> |
| <b>EMR1</b>     | <b>ILMN_12984</b>  | <b>NM_001974.3</b>    | <b>0.619543816</b> | <b>0.557693009</b> | <b>0.00157518</b> |
| <b>CTSS</b>     | <b>ILMN_13149</b>  | <b>NM_004079.3</b>    | <b>0.61862623</b>  | <b>0.483715093</b> | <b>0.00125229</b> |
| <b>RB1</b>      | <b>ILMN_4636</b>   | <b>NM_000321.1</b>    | <b>0.613674119</b> | <b>0.609960242</b> | <b>0.00277011</b> |
| <b>DAPK1</b>    | <b>ILMN_138506</b> | <b>NM_004938.1</b>    | <b>0.611697486</b> | <b>0.442825305</b> | <b>0.00275467</b> |
| <b>PECAM1</b>   | <b>ILMN_7862</b>   | <b>NM_000442.2</b>    | <b>0.60917983</b>  | <b>0.532080738</b> | <b>0.00082461</b> |
| <b>DPYSL2</b>   | <b>ILMN_9671</b>   | <b>NM_001386.4</b>    | <b>0.598054115</b> | <b>0.517590614</b> | <b>0.00082555</b> |
| <b>BCL2L2</b>   | <b>ILMN_9171</b>   | <b>NM_004050.2</b>    | <b>0.595693337</b> | <b>0.618322489</b> | <b>0.00002477</b> |
| <b>NAPSA</b>    | <b>ILMN_12115</b>  | <b>NM_004851.1</b>    | <b>0.589618584</b> | <b>0.280978366</b> | <b>0.00392265</b> |
| <b>PFKFB2</b>   | <b>ILMN_12195</b>  | <b>NM_006212.2</b>    | <b>0.58781744</b>  | <b>0.527917721</b> | <b>0.00022229</b> |
| <b>AP1S2</b>    | <b>ILMN_3812</b>   | <b>NM_003916.3</b>    | <b>0.586783759</b> | <b>0.488969433</b> | <b>0.00197668</b> |
| <b>SIPA1L1</b>  | <b>ILMN_3802</b>   | <b>NM_015556.1</b>    | <b>0.586288021</b> | <b>0.240962801</b> | <b>0.00379876</b> |
| <b>HSBP1</b>    | <b>ILMN_3025</b>   | <b>NM_001537.2</b>    | <b>0.583504819</b> | <b>1.028093735</b> | <b>0.00000000</b> |
| <b>GM2A</b>     | <b>ILMN_8836</b>   | <b>NM_000405.3</b>    | <b>0.581321147</b> | <b>0.336407175</b> | <b>0.00381796</b> |
| <b>MLL3</b>     | <b>ILMN_14020</b>  | <b>NM_170606.1</b>    | <b>0.581109919</b> | <b>0.548625483</b> | <b>0.00087683</b> |
| <b>PARP14</b>   | <b>ILMN_28517</b>  | <b>NM_017554.1</b>    | <b>0.576341503</b> | <b>0.437357265</b> | <b>0.00125215</b> |
| <b>SLC36A1</b>  | <b>ILMN_22384</b>  | <b>NM_078483.2</b>    | <b>0.569195789</b> | <b>0.579074576</b> | <b>0.00078930</b> |

|                 |             |                |              |             |            |
|-----------------|-------------|----------------|--------------|-------------|------------|
| <i>IL15</i>     | ILMN_16803  | NM_172174.1    | 0.564822943  | 0.431587521 | 0.00418995 |
| <i>CTDSP1</i>   | ILMN_13739  | NM_182642.1    | 0.561848041  | 0.540296413 | 0.00535669 |
| <i>ATP6V1A</i>  | ILMN_30226  | NM_001690.2    | 0.55307366   | 0.573954134 | 0.00042831 |
| <i>MGC33692</i> | ILMN_17332  | NM_001001794.1 | 0.551155723  | 0.452553135 | 0.00013551 |
| <i>PRDX3</i>    | ILMN_13029  | NM_014098.2    | 0.549182004  | 0.616369174 | 0.00026009 |
| <i>PHCA</i>     | ILMN_3836   | NM_018367.3    | 0.545298912  | 0.513985519 | 0.00048863 |
| <i>GNS</i>      | ILMN_6937   | NM_002076.2    | 0.54005597   | 0.702188774 | 0.00000296 |
| <i>UTRN</i>     | ILMN_15375  | NM_007124.1    | 0.537147127  | 0.626744433 | 0.00057966 |
| <i>FAM65A</i>   | ILMN_17641  | NM_024519.2    | 0.533570053  | 0.520527473 | 0.00007999 |
| <i>MTSS1</i>    | ILMN_7083   | NM_014751.2    | 0.528607408  | 0.717204372 | 0.00086115 |
| <i>WDR41</i>    | ILMN_28575  | NM_018268.2    | 0.526931841  | 0.420502405 | 0.00262646 |
| <i>PSRC2</i>    | ILMN_139272 | NM_144982.3    | 0.522449121  | 0.532229639 | 0.00143090 |
| <i>WDFY2</i>    | ILMN_14243  | NM_052950.2    | 0.522160857  | 0.949471314 | 0.00000051 |
| <i>HLA-DMB</i>  | ILMN_2252   | NM_002118.3    | 0.521835548  | 0.741714584 | 0.00015061 |
| <i>LYL1</i>     | ILMN_18317  | NM_005583.3    | 0.510433643  | 0.450602912 | 0.00217954 |
| <i>BCKDK</i>    | ILMN_13829  | NM_005881.1    | 0.506453376  | 0.42032352  | 0.00081655 |
| <i>RAPH1</i>    | ILMN_7647   | NM_025252.3    | 0.501989973  | 0.498454201 | 0.00010081 |
| <i>STAT5A</i>   | ILMN_10520  | NM_003152.2    | -0.500670735 | 0.435370699 | 0.00157763 |
| <i>PHF20</i>    | ILMN_20893  | NM_016436.3    | -0.503987875 | 0.498824041 | 0.00341753 |
| <i>GALM</i>     | ILMN_10698  | NM_138801.1    | -0.504181622 | 0.359664965 | 0.00069713 |
| <i>F8A1</i>     | ILMN_23293  | NM_012151.3    | -0.507798082 | 0.491539841 | 0.00083689 |
| <i>NCK2</i>     | ILMN_8369   | NM_003581.2    | -0.51108628  | 0.586738229 | 0.00008988 |
| <i>NUCB2</i>    | ILMN_23510  | NM_005013.1    | -0.511382323 | 0.40932896  | 0.00212353 |
| <i>C21orf57</i> | ILMN_21121  | NM_058181.1    | -0.512831996 | 0.557683419 | 0.00314669 |
| <i>TERF2</i>    | ILMN_21134  | NM_005652.2    | -0.513847741 | 0.330032666 | 0.00011668 |
| <i>ALDOC</i>    | ILMN_15767  | NM_005165.2    | -0.516607321 | 0.599294042 | 0.00077976 |
| <i>PIP5K2A</i>  | ILMN_6957   | NM_005028.3    | -0.517743119 | 0.766986504 | 0.00000226 |
| <i>CCNB1IP1</i> | ILMN_16420  | NM_021178.2    | -0.518250647 | 0.8164184   | 0.00000075 |
| <i>MLLT11</i>   | ILMN_21397  | NM_006818.3    | -0.518730151 | 0.456654026 | 0.00009982 |

|                  |            |                |              |             |            |
|------------------|------------|----------------|--------------|-------------|------------|
| <b>DNAJB9</b>    | ILMN_14354 | NM_012328.1    | -0.520897603 | 0.409938084 | 0.00286409 |
| <b>IL32</b>      | ILMN_3781  | NM_001012632.1 | -0.522542869 | 0.44597114  | 0.00295954 |
| <b>C10orf58</b>  | ILMN_17906 | NM_032333.2    | -0.529379401 | 0.490332648 | 0.00003745 |
| <b>ACTR8</b>     | ILMN_13548 | NM_022899.3    | -0.529602637 | 0.57196257  | 0.00006576 |
| <b>FTS</b>       | ILMN_9667  | NM_022476.2    | -0.537860477 | 0.34369181  | 0.00399328 |
| <b>C10orf104</b> | ILMN_7723  | NM_173473.2    | -0.538052773 | 0.406663671 | 0.00136886 |
| <b>FLJ38451</b>  | ILMN_19229 | NM_175872.3    | -0.538937665 | 0.495254186 | 0.00114409 |
| <b>ZNF545</b>    | ILMN_15084 | NM_133466.1    | -0.550666864 | 0.666747897 | 0.00002844 |
| <b>FYN</b>       | ILMN_5919  | NM_002037.3    | -0.551294472 | 0.644773866 | 0.00023300 |
| <b>C9orf30</b>   | ILMN_15668 | NM_080655.1    | -0.551461916 | 0.564346926 | 0.00012317 |
| <b>PTPN4</b>     | ILMN_29562 | NM_002830.2    | -0.552003607 | 0.518687009 | 0.00005066 |
| <b>LOC81558</b>  | ILMN_29450 | NM_030802.2    | -0.555552873 | 0.386435279 | 0.00176926 |
| <b>ARHGAP10</b>  | ILMN_24582 | NM_024605.3    | -0.555899324 | 0.658071995 | 0.00024664 |
| <b>RNF144</b>    | ILMN_15740 | NM_014746.2    | -0.558532274 | 0.398131551 | 0.00229456 |
| <b>PRAF1</b>     | ILMN_2978  | NM_022490.1    | -0.558972433 | 0.701645712 | 0.00001024 |
| <b>NDFIP2</b>    | ILMN_23410 | NM_019080.1    | -0.564231612 | 0.273391931 | 0.00514154 |
| <b>HAPLN3</b>    | ILMN_19816 | NM_178232.2    | -0.565399962 | 0.479939961 | 0.00441729 |
| <b>CCDC58</b>    | ILMN_27140 | NM_001017928.2 | -0.568494148 | 0.626422203 | 0.00010018 |
| <b>TPST2</b>     | ILMN_13248 | NM_001008566.1 | -0.568686202 | 0.407049282 | 0.00051135 |
| <b>RAB7L1</b>    | ILMN_27192 | NM_003929.1    | -0.576039588 | 0.826731839 | 0.00000008 |
| <b>LAX1</b>      | ILMN_29004 | NM_017773.2    | -0.576809737 | 0.715075083 | 0.00000556 |
| <b>TUBE1</b>     | ILMN_7563  | NM_016262.3    | -0.579367228 | 0.372958665 | 0.00033726 |
| <b>SFXN1</b>     | ILMN_16398 | NM_022754.4    | -0.58091346  | 0.523626325 | 0.00185844 |
| <b>ACACB</b>     | ILMN_3318  | NM_001093.2    | -0.582496141 | 0.647708036 | 0.00095975 |
| <b>TBCC</b>      | ILMN_25053 | NM_003192.1    | -0.585662135 | 0.47986098  | 0.00022676 |
| <b>CBR3</b>      | ILMN_8256  | NM_001236.3    | -0.587778543 | 0.576774225 | 0.00006243 |
| <b>SATB1</b>     | ILMN_6836  | NM_002971.2    | -0.59024576  | 0.491733379 | 0.00029065 |
| <b>MGC17330</b>  | ILMN_15026 | NM_052880.3    | -0.592236188 | 0.554114679 | 0.00105096 |
| <b>VIPR1</b>     | ILMN_27565 | NM_004624.2    | -0.593070326 | 0.451776741 | 0.00062580 |

|                        |                    |                       |                     |                    |                   |
|------------------------|--------------------|-----------------------|---------------------|--------------------|-------------------|
| <b><i>NPDC1</i></b>    | <b>ILMN_5190</b>   | <b>NM_015392.2</b>    | <b>-0.593493903</b> | <b>0.51503047</b>  | <b>0.00186892</b> |
| <b><i>AGMAT</i></b>    | <b>ILMN_24467</b>  | <b>NM_024758.3</b>    | <b>-0.595396271</b> | <b>0.460747866</b> | <b>0.00275354</b> |
| <b><i>ZNF184</i></b>   | <b>ILMN_22535</b>  | <b>NM_007149.1</b>    | <b>-0.597689887</b> | <b>0.368618408</b> | <b>0.00486717</b> |
| <b><i>PRR7</i></b>     | <b>ILMN_17178</b>  | <b>NM_030567.2</b>    | <b>-0.604413556</b> | <b>0.536832382</b> | <b>0.00286203</b> |
| <b><i>SMPD1</i></b>    | <b>ILMN_8257</b>   | <b>NM_001007593.1</b> | <b>-0.604949755</b> | <b>0.538651833</b> | <b>0.00161182</b> |
| <b><i>BRF2</i></b>     | <b>ILMN_2966</b>   | <b>NM_018310.2</b>    | <b>-0.606067504</b> | <b>0.573735878</b> | <b>0.00010726</b> |
| <b><i>PTGER4</i></b>   | <b>ILMN_13328</b>  | <b>NM_000958.2</b>    | <b>-0.606450332</b> | <b>0.562488851</b> | <b>0.00001934</b> |
| <b><i>FEZ1</i></b>     | <b>ILMN_419</b>    | <b>NM_022549.2</b>    | <b>-0.609292102</b> | <b>0.457577683</b> | <b>0.00682154</b> |
| <b><i>SDCCAG33</i></b> | <b>ILMN_138968</b> | <b>NM_005786.3</b>    | <b>-0.614368954</b> | <b>0.635549907</b> | <b>0.00001713</b> |
| <b><i>DPP4</i></b>     | <b>ILMN_20248</b>  | <b>NM_001935.3</b>    | <b>-0.618288342</b> | <b>0.45091084</b>  | <b>0.00176525</b> |
| <b><i>PNRC1</i></b>    | <b>ILMN_24710</b>  | <b>NM_006813.1</b>    | <b>-0.628831373</b> | <b>0.489596307</b> | <b>0.00111420</b> |
| <b><i>FLJ20152</i></b> | <b>ILMN_139301</b> | <b>NM_019000.2</b>    | <b>-0.634230056</b> | <b>0.456511434</b> | <b>0.00109561</b> |
| <b><i>MAN1C1</i></b>   | <b>ILMN_12633</b>  | <b>NM_020379.1</b>    | <b>-0.635341768</b> | <b>0.48916714</b>  | <b>0.00048381</b> |
| <b><i>SOX8</i></b>     | <b>ILMN_30180</b>  | <b>NM_014587.2</b>    | <b>-0.638937302</b> | <b>0.457483381</b> | <b>0.00089229</b> |
| <b><i>CACNA2D2</i></b> | <b>ILMN_15989</b>  | <b>NM_001005505.1</b> | <b>-0.647755763</b> | <b>0.613426228</b> | <b>0.00134567</b> |
| <b><i>DNAJB1</i></b>   | <b>ILMN_19740</b>  | <b>NM_006145.1</b>    | <b>-0.647877454</b> | <b>0.474267591</b> | <b>0.00101160</b> |
| <b><i>TXK</i></b>      | <b>ILMN_19719</b>  | <b>NM_003328.1</b>    | <b>-0.649402059</b> | <b>0.355423427</b> | <b>0.00273011</b> |
| <b><i>PKIA</i></b>     | <b>ILMN_4343</b>   | <b>NM_006823.2</b>    | <b>-0.651907566</b> | <b>0.461906271</b> | <b>0.00001972</b> |
| <b><i>ZBTB16</i></b>   | <b>ILMN_11903</b>  | <b>NM_006006.4</b>    | <b>-0.654391514</b> | <b>0.523059876</b> | <b>0.00196632</b> |
| <b><i>HSPA8</i></b>    | <b>ILMN_14829</b>  | <b>NM_153201.1</b>    | <b>-0.659647107</b> | <b>0.627352179</b> | <b>0.00000291</b> |
| <b><i>LEF1</i></b>     | <b>ILMN_30265</b>  | <b>NM_016269.2</b>    | <b>-0.664492864</b> | <b>0.374513301</b> | <b>0.00142701</b> |
| <b><i>ABHD14B</i></b>  | <b>ILMN_24812</b>  | <b>NM_032750.1</b>    | <b>-0.667660274</b> | <b>0.753596144</b> | <b>0.00000440</b> |
| <b><i>RPL14</i></b>    | <b>ILMN_138835</b> | <b>NM_003973.2</b>    | <b>-0.671818838</b> | <b>0.42344653</b>  | <b>0.00348419</b> |
| <b><i>PITPNC1</i></b>  | <b>ILMN_12660</b>  | <b>NM_181671.1</b>    | <b>-0.675741411</b> | <b>0.763012992</b> | <b>0.00000200</b> |
| <b><i>LPHN1</i></b>    | <b>ILMN_12017</b>  | <b>NM_014921.3</b>    | <b>-0.680224127</b> | <b>0.555516456</b> | <b>0.00003588</b> |
| <b><i>MGAT4A</i></b>   | <b>ILMN_139237</b> | <b>NM_012214.1</b>    | <b>-0.686439815</b> | <b>0.588282515</b> | <b>0.00020394</b> |
| <b><i>GIMAP7</i></b>   | <b>ILMN_2211</b>   | <b>NM_153236.3</b>    | <b>-0.688384375</b> | <b>0.309418302</b> | <b>0.00108814</b> |
| <b><i>GFI1</i></b>     | <b>ILMN_30079</b>  | <b>NM_005263.2</b>    | <b>-0.688429664</b> | <b>0.810063077</b> | <b>0.00000287</b> |
| <b><i>STAT4</i></b>    | <b>ILMN_8937</b>   | <b>NM_003151.2</b>    | <b>-0.69335148</b>  | <b>0.741700081</b> | <b>0.00001454</b> |

|                 |                    |                    |                     |                    |                   |
|-----------------|--------------------|--------------------|---------------------|--------------------|-------------------|
| <b>TGFBR3</b>   | <b>ILMN_22620</b>  | <b>NM_003243.2</b> | <b>-0.695968502</b> | <b>0.697370522</b> | <b>0.00024601</b> |
| <b>NAP1L5</b>   | <b>ILMN_5355</b>   | <b>NM_153757.1</b> | <b>-0.696281078</b> | <b>0.482970013</b> | <b>0.00118408</b> |
| <b>TRAT1</b>    | <b>ILMN_24557</b>  | <b>NM_016388.2</b> | <b>-0.701865172</b> | <b>0.431978638</b> | <b>0.00022583</b> |
| <b>PIM2</b>     | <b>ILMN_27932</b>  | <b>NM_006875.2</b> | <b>-0.705939469</b> | <b>0.745720347</b> | <b>0.00000049</b> |
| <b>MGC15763</b> | <b>ILMN_137229</b> | <b>NM_138381.1</b> | <b>-0.707467198</b> | <b>0.452639641</b> | <b>0.00160886</b> |
| <b>LCMT2</b>    | <b>ILMN_7283</b>   | <b>NM_014793.3</b> | <b>-0.708548025</b> | <b>0.676237692</b> | <b>0.00000198</b> |
| <b>PLCG1</b>    | <b>ILMN_3773</b>   | <b>NM_002660.2</b> | <b>-0.713682121</b> | <b>0.584297133</b> | <b>0.00056091</b> |
| <b>IL18RAP</b>  | <b>ILMN_16084</b>  | <b>NM_003853.2</b> | <b>-0.715943068</b> | <b>0.595867225</b> | <b>0.00016263</b> |
| <b>CD5</b>      | <b>ILMN_29547</b>  | <b>NM_014207.2</b> | <b>-0.719666211</b> | <b>0.501385904</b> | <b>0.00212931</b> |
| <b>FAM84B</b>   | <b>ILMN_7137</b>   | <b>NM_174911.3</b> | <b>-0.72095523</b>  | <b>0.66943369</b>  | <b>0.00000022</b> |
| <b>NCR3</b>     | <b>ILMN_19702</b>  | <b>NM_147130.1</b> | <b>-0.724076246</b> | <b>0.486364877</b> | <b>0.00400738</b> |
| <b>TSEN54</b>   | <b>ILMN_8569</b>   | <b>NM_207346.1</b> | <b>-0.727498633</b> | <b>0.599435131</b> | <b>0.00170913</b> |
| <b>FLT3LG</b>   | <b>ILMN_4754</b>   | <b>NM_001459.2</b> | <b>-0.727594431</b> | <b>0.672271482</b> | <b>0.00038973</b> |
| <b>TKTL1</b>    | <b>ILMN_23315</b>  | <b>NM_012253.2</b> | <b>-0.727847582</b> | <b>0.605461651</b> | <b>0.00069483</b> |
| <b>CTLA4</b>    | <b>ILMN_138103</b> | <b>NM_005214.2</b> | <b>-0.738130072</b> | <b>0.934673244</b> | <b>0.00000139</b> |
| <b>SOCS1</b>    | <b>ILMN_3038</b>   | <b>NM_003745.1</b> | <b>-0.739455522</b> | <b>0.502522482</b> | <b>0.00313209</b> |
| <b>ELA1</b>     | <b>ILMN_24603</b>  | <b>NM_001971.4</b> | <b>-0.744576877</b> | <b>0.725031145</b> | <b>0.00029205</b> |
| <b>CD8A</b>     | <b>ILMN_2358</b>   | <b>NM_001768.4</b> | <b>-0.744678001</b> | <b>0.594696025</b> | <b>0.00026942</b> |
| <b>ITK</b>      | <b>ILMN_23317</b>  | <b>NM_005546.3</b> | <b>-0.745007112</b> | <b>0.704824671</b> | <b>0.00008908</b> |
| <b>TCEA3</b>    | <b>ILMN_27218</b>  | <b>NM_003196.1</b> | <b>-0.750750252</b> | <b>0.592066255</b> | <b>0.00023655</b> |
| <b>ICOS</b>     | <b>ILMN_9996</b>   | <b>NM_012092.2</b> | <b>-0.75237042</b>  | <b>0.513242042</b> | <b>0.00046944</b> |
| <b>KLRG1</b>    | <b>ILMN_12613</b>  | <b>NM_005810.3</b> | <b>-0.774039085</b> | <b>0.254607132</b> | <b>0.00294923</b> |
| <b>AXIN2</b>    | <b>ILMN_26857</b>  | <b>NM_004655.2</b> | <b>-0.805082477</b> | <b>0.436443044</b> | <b>0.00158082</b> |
| <b>BCL9L</b>    | <b>ILMN_27555</b>  | <b>NM_182557.1</b> | <b>-0.807656854</b> | <b>0.554059637</b> | <b>0.00141276</b> |
| <b>CD248</b>    | <b>ILMN_25766</b>  | <b>NM_020404.2</b> | <b>-0.812370151</b> | <b>0.463357687</b> | <b>0.00238338</b> |
| <b>FHIT</b>     | <b>ILMN_15082</b>  | <b>NM_002012.1</b> | <b>-0.820857634</b> | <b>0.578811154</b> | <b>0.00019084</b> |
| <b>C10orf35</b> | <b>ILMN_13661</b>  | <b>NM_145306.1</b> | <b>-0.828257411</b> | <b>0.58713647</b>  | <b>0.00010833</b> |
| <b>GPR171</b>   | <b>ILMN_21194</b>  | <b>NM_013308.2</b> | <b>-0.832290597</b> | <b>0.331305728</b> | <b>0.00290693</b> |
| <b>PTPRM</b>    | <b>ILMN_19957</b>  | <b>NM_002845.2</b> | <b>-0.832917155</b> | <b>0.636816195</b> | <b>0.00008494</b> |

|                 |             |                |              |             |            |
|-----------------|-------------|----------------|--------------|-------------|------------|
| <b>CD2</b>      | ILMN_6738   | NM_001767.2    | -0.840438326 | 0.646691342 | 0.00000117 |
| <b>PDZD4</b>    | ILMN_3986   | NM_032512.2    | -0.86138807  | 0.603890033 | 0.00013770 |
| <b>BAMBI</b>    | ILMN_8469   | NM_012342.2    | -0.871810097 | 0.502263163 | 0.00294778 |
| <b>PLEKHB1</b>  | ILMN_2859   | NM_021200.1    | -0.878172562 | 0.839629344 | 0.00000692 |
| <b>HOXB2</b>    | ILMN_137588 | NM_002145.2    | -0.884877446 | 0.551939309 | 0.00030257 |
| <b>PAFAH2</b>   | ILMN_3410   | NM_000437.2    | -0.8943644   | 0.892782604 | 0.00000000 |
| <b>MAL</b>      | ILMN_3411   | NM_002371.2    | -0.895921565 | 0.925808311 | 0.00000271 |
| <b>SERPINE2</b> | ILMN_1946   | NM_006216.2    | -0.904483902 | 0.45419718  | 0.00008303 |
| <b>C6orf105</b> | ILMN_10287  | NM_032744.1    | -0.909531884 | 0.664422571 | 0.00002912 |
| <b>CD3E</b>     | ILMN_24240  | NM_000733.2    | -0.93235239  | 0.629082883 | 0.00000614 |
| <b>CD69</b>     | ILMN_13491  | NM_001781.1    | -0.942527846 | 0.457624176 | 0.00064713 |
| <b>PTGDS</b>    | ILMN_19248  | NM_000954.5    | -0.946494867 | 0.505533305 | 0.00175037 |
| <b>GIMAP5</b>   | ILMN_27010  | NM_018384.3    | -0.953022963 | 0.419538221 | 0.00201391 |
| <b>HSPA1B</b>   | ILMN_25549  | NM_005346.3    | -0.953328978 | 0.212241703 | 0.00269290 |
| <b>PPP2R2B</b>  | ILMN_1007   | NM_181676.1    | -0.965173716 | 0.615737601 | 0.00006002 |
| <b>EOMES</b>    | ILMN_19998  | NM_005442.2    | -0.968337892 | 0.470291119 | 0.00028010 |
| <b>H2AFX</b>    | ILMN_23585  | NM_002105.2    | -0.97692086  | 0.813438146 | 0.00000330 |
| <b>GZMH</b>     | ILMN_10239  | NM_033423.2    | -0.98083047  | 0.527411198 | 0.00060255 |
| <b>CITED4</b>   | ILMN_15271  | NM_133467.2    | -0.984893442 | 0.765096915 | 0.00000350 |
| <b>CCDC65</b>   | ILMN_22276  | NM_033124.2    | -0.990896676 | 0.575384317 | 0.00024815 |
| <b>KSP37</b>    | ILMN_16684  | NM_031950.2    | -0.999642264 | 0.681807509 | 0.00001688 |
| <b>ZNF683</b>   | ILMN_2307   | NM_173574.1    | -1.032728562 | 0.562264358 | 0.00193259 |
| <b>TARP</b>     | ILMN_25716  | NM_001003799.1 | -1.051625612 | 0.64274719  | 0.00000020 |
| <b>ADRB2</b>    | ILMN_2022   | NM_000024.3    | -1.055053118 | 0.847589262 | 0.00000011 |
| <b>FEZ1</b>     | ILMN_28992  | NM_005103.3    | -1.127136623 | 0.763414541 | 0.00001994 |
| <b>GNLY</b>     | ILMN_13145  | NM_012483.1    | -1.148412672 | 0.821905939 | 0.00000141 |
| <b>BATF</b>     | ILMN_3307   | NM_006399.2    | -1.174102973 | 0.519569456 | 0.00332655 |
| <b>AKR1C3</b>   | ILMN_11871  | NM_003739.4    | -1.189643568 | 0.627865296 | 0.00000337 |
| <b>IL23A</b>    | ILMN_20797  | NM_016584.2    | -1.232537149 | 0.588923763 | 0.00009415 |





**Supp. Table S2C. *SOS1* signature  
(75 probes, 73 genes)**

| Symbol          | TargetID   | Accession      | L2R<br>Disease/CTRL | ABS SNR<br>Disease/CTRL | T-test p-value<br>Disease vs<br>Control |
|-----------------|------------|----------------|---------------------|-------------------------|-----------------------------------------|
| <i>RALGPS2</i>  | ILMN_701   | NM_018037.1    | 0.887552664         | 0.448616072             | 0.00161622                              |
| <i>PHF20L1</i>  | ILMN_25591 | NM_032205.2    | 0.886871298         | 0.381517999             | 0.00038379                              |
| <i>KLHL24</i>   | ILMN_26914 | NM_017644.3    | 0.789824755         | 0.505242446             | 0.00002312                              |
| <i>EIF2AK3</i>  | ILMN_26832 | NM_004836.3    | 0.785432084         | 0.046890124             | 0.00339153                              |
| <i>PTBP2</i>    | ILMN_556   | NM_021190.1    | 0.779793993         | 0.183024136             | 0.00664570                              |
| <i>MTMR6</i>    | ILMN_29967 | NM_004685.2    | 0.777000277         | 0.232481964             | 0.00177702                              |
| <i>ZNF529</i>   | ILMN_24517 | NM_020951.1    | 0.768697038         | 0.137110056             | 0.00000472                              |
| <i>CHD7</i>     | ILMN_29669 | NM_017780.2    | 0.763311195         | 0.053506036             | 0.00053082                              |
| <i>WDR33</i>    | ILMN_6704  | NM_001006623.1 | 0.762698764         | 0.557560131             | 0.00884851                              |
| <i>KIAA0776</i> | ILMN_26630 | NM_015323.2    | 0.732036421         | 0.464464474             | 0.00038782                              |
| <i>SFRS12</i>   | ILMN_8967  | NM_139168.1    | 0.731518633         | 0.184442106             | 0.00041407                              |
| <i>RUNDC2A</i>  | ILMN_705   | NM_032167.1    | 0.721018309         | 0.284472895             | 0.00366201                              |
| <i>GABPA</i>    | ILMN_28392 | NM_002040.2    | 0.704789114         | 0.592919139             | 0.00187652                              |
| <i>RICTOR</i>   | ILMN_2994  | NM_152756.3    | 0.691392413         | 0.120805648             | 0.00227054                              |
| <i>MTSS1</i>    | ILMN_7083  | NM_014751.2    | 0.682974828         | 0.717204372             | 0.00112968                              |
| <i>IFT57</i>    | ILMN_21390 | NM_018010.2    | 0.675190082         | 0.229633029             | 0.00070011                              |
| <i>ADAM9</i>    | ILMN_922   | NM_003816.2    | 0.666180851         | 0.559339882             | 0.00378554                              |
| <i>FAM76B</i>   | ILMN_22478 | NM_144664.3    | 0.66576136          | 0.23771187              | 0.00010042                              |
| <i>N4BP2</i>    | ILMN_7118  | NM_018177.2    | 0.655425286         | 0.033654735             | 0.00172032                              |
| <i>RRM2B</i>    | ILMN_11053 | NM_015713.3    | 0.646273865         | 0.346860048             | 0.00848695                              |
| <i>PFKFB2</i>   | ILMN_12195 | NM_006212.2    | 0.617236289         | 0.527917721             | 0.00735058                              |
| <i>ZNF238</i>   | ILMN_5128  | NM_205768.1    | 0.610480963         | 0.060455926             | 0.00135583                              |
| <i>KLHL2</i>    | ILMN_24870 | NM_007246.2    | 0.604165553         | 0.60291658              | 0.00161532                              |

|                  |                    |                    |                     |                    |                   |
|------------------|--------------------|--------------------|---------------------|--------------------|-------------------|
| <b>YTHDC2</b>    | <b>ILMN_23803</b>  | <b>NM_022828.2</b> | <b>0.59555144</b>   | <b>0.496064684</b> | <b>0.00614677</b> |
| <b>POGZ</b>      | <b>ILMN_14081</b>  | <b>NM_145796.2</b> | <b>0.583319511</b>  | <b>0.614652705</b> | <b>0.00282129</b> |
| <b>GMFB</b>      | <b>ILMN_14672</b>  | <b>NM_004124.2</b> | <b>0.581168767</b>  | <b>0.529244679</b> | <b>0.00157471</b> |
| <b>OTUD6B</b>    | <b>ILMN_22397</b>  | <b>NM_016023.2</b> | <b>0.56912336</b>   | <b>0.304742464</b> | <b>0.00025795</b> |
| <b>REV3L</b>     | <b>ILMN_17913</b>  | <b>NM_002912.1</b> | <b>0.554148355</b>  | <b>0.157091571</b> | <b>0.00791183</b> |
| <b>APRIN</b>     | <b>ILMN_20213</b>  | <b>NM_015032.1</b> | <b>0.554085012</b>  | <b>0.273969544</b> | <b>0.00094423</b> |
| <b>FBXL3</b>     | <b>ILMN_4998</b>   | <b>NM_012158.1</b> | <b>0.551660242</b>  | <b>0.218317691</b> | <b>0.00013307</b> |
| <b>STIL</b>      | <b>ILMN_13235</b>  | <b>NM_003035.1</b> | <b>0.545234399</b>  | <b>0.287286475</b> | <b>0.00068769</b> |
| <b>TMEM41B</b>   | <b>ILMN_8205</b>   | <b>NM_015012.1</b> | <b>0.522333116</b>  | <b>0.303516321</b> | <b>0.00269601</b> |
| <b>CST6</b>      | <b>ILMN_20022</b>  | <b>NM_001323.2</b> | <b>0.511932826</b>  | <b>0.534088911</b> | <b>0.00921454</b> |
| <b>GOLT1B</b>    | <b>ILMN_5124</b>   | <b>NM_016072.2</b> | <b>0.510560422</b>  | <b>0.202116925</b> | <b>0.00346801</b> |
| <b>FUT8</b>      | <b>ILMN_9754</b>   | <b>NM_178154.1</b> | <b>0.505064035</b>  | <b>0.08981082</b>  | <b>0.00698557</b> |
| <b>NKTR</b>      | <b>ILMN_23378</b>  | <b>NM_005385.3</b> | <b>0.50434282</b>   | <b>0.294652457</b> | <b>0.00811464</b> |
| <b>C6orf125</b>  | <b>ILMN_21424</b>  | <b>NM_032340.1</b> | <b>-0.511492388</b> | <b>0.101057435</b> | <b>0.00762676</b> |
| <b>MRPL34</b>    | <b>ILMN_5839</b>   | <b>NM_023937.2</b> | <b>-0.511956713</b> | <b>0.348464173</b> | <b>0.00321254</b> |
| <b>HSPA8</b>     | <b>ILMN_14829</b>  | <b>NM_153201.1</b> | <b>-0.512721673</b> | <b>0.627352179</b> | <b>0.00056648</b> |
| <b>CD2</b>       | <b>ILMN_6738</b>   | <b>NM_001767.2</b> | <b>-0.522321422</b> | <b>0.646691342</b> | <b>0.00917697</b> |
| <b>DOK2</b>      | <b>ILMN_137779</b> | <b>NM_201349.1</b> | <b>-0.523050722</b> | <b>0.190787501</b> | <b>0.00805286</b> |
| <b>STIP1</b>     | <b>ILMN_28761</b>  | <b>NM_006819.1</b> | <b>-0.525327079</b> | <b>0.124331572</b> | <b>0.00095539</b> |
| <b>OAZ2</b>      | <b>ILMN_28141</b>  | <b>NM_002537.1</b> | <b>-0.53824496</b>  | <b>0.092826187</b> | <b>0.00356120</b> |
| <b>LOC84661</b>  | <b>ILMN_18534</b>  | <b>NM_032574.2</b> | <b>-0.548863028</b> | <b>0.216935995</b> | <b>0.00012449</b> |
| <b>ACD</b>       | <b>ILMN_5907</b>   | <b>NM_022914.1</b> | <b>-0.553579904</b> | <b>0.602229848</b> | <b>0.00137820</b> |
| <b>LAX1</b>      | <b>ILMN_29004</b>  | <b>NM_017773.2</b> | <b>-0.55474973</b>  | <b>0.715075083</b> | <b>0.00188353</b> |
| <b>IL27RA</b>    | <b>ILMN_9407</b>   | <b>NM_004843.2</b> | <b>-0.562860221</b> | <b>0.10261292</b>  | <b>0.00878351</b> |
| <b>ARHGAP10</b>  | <b>ILMN_24582</b>  | <b>NM_024605.3</b> | <b>-0.563466431</b> | <b>0.658071995</b> | <b>0.00152804</b> |
| <b>TNFSF12</b>   | <b>ILMN_24599</b>  | <b>NM_003809.2</b> | <b>-0.56770749</b>  | <b>0.022913821</b> | <b>0.00272199</b> |
| <b>PRUNE</b>     | <b>ILMN_27601</b>  | <b>NM_021222.1</b> | <b>-0.586301157</b> | <b>0.552904262</b> | <b>0.00028104</b> |
| <b>CTLA4</b>     | <b>ILMN_138103</b> | <b>NM_005214.2</b> | <b>-0.597555801</b> | <b>0.934673244</b> | <b>0.00243881</b> |
| <b>LOC340061</b> | <b>ILMN_18797</b>  | <b>NM_198282.1</b> | <b>-0.598431803</b> | <b>0.147162724</b> | <b>0.00052177</b> |

|                  |                   |                       |                     |                    |                   |
|------------------|-------------------|-----------------------|---------------------|--------------------|-------------------|
| <b>MAF</b>       | <b>ILMN_15072</b> | <b>NM_005360.3</b>    | <b>-0.62329548</b>  | <b>0.565299503</b> | <b>0.00302416</b> |
| <b>PIP5K2A</b>   | <b>ILMN_6957</b>  | <b>NM_005028.3</b>    | <b>-0.62350074</b>  | <b>0.766986504</b> | <b>0.00205711</b> |
| <b>PSTPIP1</b>   | <b>ILMN_28119</b> | <b>NM_003978.2</b>    | <b>-0.631863194</b> | <b>0.361537535</b> | <b>0.00139096</b> |
| <b>ACACB</b>     | <b>ILMN_3318</b>  | <b>NM_001093.2</b>    | <b>-0.6348178</b>   | <b>0.647708036</b> | <b>0.00745327</b> |
| <b>TRAFD1</b>    | <b>ILMN_21539</b> | <b>NM_006700.1</b>    | <b>-0.637847522</b> | <b>0.124969592</b> | <b>0.00050092</b> |
| <b>F8A1</b>      | <b>ILMN_23293</b> | <b>NM_012151.3</b>    | <b>-0.654659866</b> | <b>0.491539841</b> | <b>0.00294327</b> |
| <b>CD300A</b>    | <b>ILMN_20704</b> | <b>NM_007261.2</b>    | <b>-0.655556789</b> | <b>0.004475384</b> | <b>0.00771681</b> |
| <b>GFI1</b>      | <b>ILMN_30079</b> | <b>NM_005263.2</b>    | <b>-0.657538415</b> | <b>0.810063077</b> | <b>0.00106955</b> |
| <b>DNAJB6</b>    | <b>ILMN_7651</b>  | <b>NM_058246.3</b>    | <b>-0.657540414</b> | <b>0.136315949</b> | <b>0.00094113</b> |
| <b>CD244</b>     | <b>ILMN_7885</b>  | <b>NM_016382.2</b>    | <b>-0.678423036</b> | <b>0.064757497</b> | <b>0.00103571</b> |
| <b>GALM</b>      | <b>ILMN_10698</b> | <b>NM_138801.1</b>    | <b>-0.681834064</b> | <b>0.359664965</b> | <b>0.00008995</b> |
| <b>TPST2</b>     | <b>ILMN_13248</b> | <b>NM_001008566.1</b> | <b>-0.769125088</b> | <b>0.407049282</b> | <b>0.00239127</b> |
| <b>ASCL2</b>     | <b>ILMN_18051</b> | <b>NM_005170.2</b>    | <b>-0.772775101</b> | <b>0.106077588</b> | <b>0.00417781</b> |
| <b>GPLY</b>      | <b>ILMN_13145</b> | <b>NM_012483.1</b>    | <b>-0.875999817</b> | <b>0.821905939</b> | <b>0.00579909</b> |
| <b>LOC442535</b> | <b>ILMN_16993</b> | <b>NM_001013738.1</b> | <b>-0.889737645</b> | <b>0.275652692</b> | <b>0.00467506</b> |
| <b>GLRX</b>      | <b>ILMN_22606</b> | <b>NM_002064.1</b>    | <b>-0.890483179</b> | <b>0.052715708</b> | <b>0.00059598</b> |
| <b>APOBEC3G</b>  | <b>ILMN_15884</b> | <b>NM_021822.1</b>    | <b>-0.893364866</b> | <b>0.380714828</b> | <b>0.00376115</b> |
| <b>ADRB2</b>     | <b>ILMN_2022</b>  | <b>NM_000024.3</b>    | <b>-0.915472812</b> | <b>0.847589262</b> | <b>0.00010301</b> |
| <b>ELA1</b>      | <b>ILMN_24603</b> | <b>NM_001971.4</b>    | <b>-0.916899993</b> | <b>0.725031145</b> | <b>0.00159014</b> |
| <b>TARP</b>      | <b>ILMN_25716</b> | <b>NM_001003799.1</b> | <b>-1.030821564</b> | <b>0.64274719</b>  | <b>0.00032237</b> |
| <b>EOMES</b>     | <b>ILMN_19998</b> | <b>NM_005442.2</b>    | <b>-1.172206716</b> | <b>0.470291119</b> | <b>0.00070222</b> |

**Supp. Table S2D. *SHOC2* signature  
(1407 probes, 1394 genes)**

| Symbol          | TargetID    | Accession      | L2R<br>Disease/CTRL | ABS SNR<br>Disease/CTRL | T-test p-<br>value<br>Disease vs<br>Control |
|-----------------|-------------|----------------|---------------------|-------------------------|---------------------------------------------|
| <i>P2RY13</i>   | ILMN_9350   | NM_176894.1    | 3.230795638         | 2.030205509             | 0.00001198                                  |
| <i>NCF1</i>     | ILMN_136961 | NM_000265.1    | 3.004866306         | 2.360147597             | 0.00000080                                  |
| <i>MS4A6A</i>   | ILMN_2009   | NM_022349.2    | 2.944993248         | 1.909673758             | 0.00004979                                  |
| <i>PDK4</i>     | ILMN_23211  | NM_002612.2    | 2.917049119         | 1.36453749              | 0.00000847                                  |
| <i>SLC25A20</i> | ILMN_29792  | NM_000387.3    | 2.777594697         | 1.901681385             | 0.00000428                                  |
| <i>TRIM5</i>    | ILMN_760    | NM_033034.1    | 2.561102611         | 1.686441216             | 0.00002655                                  |
| <i>CD79B</i>    | ILMN_139125 | NM_000626.1    | 2.55830839          | 1.080894212             | 0.00048045                                  |
| <i>TNFSF10</i>  | ILMN_22827  | NM_003810.2    | 2.430831207         | 1.68313466              | 0.00000525                                  |
| <i>LTF</i>      | ILMN_20816  | NM_002343.2    | 2.415277282         | 1.137858007             | 0.00008957                                  |
| <i>MARCH1</i>   | ILMN_30212  | NM_017923.2    | 2.400620779         | 1.559775716             | 0.00003376                                  |
| <i>PSMB8</i>    | ILMN_12139  | NM_148919.3    | 2.372593273         | 1.806981162             | 0.00002239                                  |
| <i>HSPA1A</i>   | ILMN_6623   | NM_005345.4    | 2.346566122         | 1.635865024             | 0.00041219                                  |
| <i>FGL2</i>     | ILMN_19861  | NM_006682.1    | 2.268977886         | 1.920709435             | 0.00000936                                  |
| <i>VNN1</i>     | ILMN_14011  | NM_004666.1    | 2.257784258         | 1.193513682             | 0.00016922                                  |
| <i>ARHGAP30</i> | ILMN_15952  | NM_001025598.1 | 2.255861969         | 1.586025349             | 0.00002175                                  |
| <i>GCA</i>      | ILMN_25626  | NM_012198.2    | 2.197907204         | 1.703770495             | 0.00007464                                  |
| <i>OAS1</i>     | ILMN_2958   | NM_016816.2    | 2.160455366         | 1.034754352             | 0.00009705                                  |
| <i>SNAP23</i>   | ILMN_29211  | NM_003825.2    | 2.159463633         | 2.375349613             | 0.00000160                                  |
| <i>NFE2</i>     | ILMN_5749   | NM_006163.1    | 2.125813345         | 1.404932233             | 0.00024891                                  |
| <i>FLJ33641</i> | ILMN_2666   | NM_152687.1    | 2.117646439         | 1.355499921             | 0.00005480                                  |
| <i>CD1D</i>     | ILMN_926    | NM_001766.2    | 2.115842557         | 1.398556308             | 0.00035065                                  |
| <i>CLEC12A</i>  | ILMN_24114  | NM_201625.1    | 2.106645106         | 1.864408376             | 0.00000426                                  |
| <i>ECGF1</i>    | ILMN_18760  | NM_001953.2    | 2.044651326         | 1.166814773             | 0.00008155                                  |

|                  |            |                |             |             |            |
|------------------|------------|----------------|-------------|-------------|------------|
| <i>GRN</i>       | ILMN_18655 | NM_002087.2    | 2.03746384  | 1.669620931 | 0.00000234 |
| <i>TLR5</i>      | ILMN_18399 | NM_003268.3    | 2.030218218 | 1.458223711 | 0.00023624 |
| <i>C4orf18</i>   | ILMN_657   | NM_016613.4    | 2.002013059 | 1.060512331 | 0.00086947 |
| <i>TSCOT</i>     | ILMN_10869 | NM_033051.2    | 1.977658192 | 1.470729682 | 0.00000801 |
| <i>FZD2</i>      | ILMN_12499 | NM_001466.2    | 1.970187777 | 1.39558521  | 0.00004423 |
| <i>AIM2</i>      | ILMN_10231 | NM_004833.1    | 1.952499983 | 1.452545483 | 0.00021779 |
| <i>IDH1</i>      | ILMN_14217 | NM_005896.2    | 1.939463119 | 2.996203368 | 0.00000001 |
| <i>CX3CR1</i>    | ILMN_8593  | NM_001337.3    | 1.935125349 | 1.317200409 | 0.00084901 |
| <i>GIMAP4</i>    | ILMN_26906 | NM_018326.2    | 1.891877366 | 1.236698351 | 0.00013957 |
| <i>SASH1</i>     | ILMN_22260 | NM_015278.3    | 1.869888573 | 1.605883404 | 0.00000252 |
| <i>OPN3</i>      | ILMN_26329 | NM_001030012.1 | 1.869768692 | 1.815957077 | 0.00000269 |
| <i>MS4A6A</i>    | ILMN_1889  | NM_152851.1    | 1.85318862  | 1.571238152 | 0.00006337 |
| <i>EVA1</i>      | ILMN_23335 | NM_005797.2    | 1.845981029 | 1.278843117 | 0.00143771 |
| <i>NYD-SP21</i>  | ILMN_8529  | NM_032597.2    | 1.83140234  | 1.405564479 | 0.00001489 |
| <i>CACNA2D3</i>  | ILMN_1908  | NM_018398.2    | 1.829719711 | 1.168758985 | 0.00099030 |
| <i>MS4A3</i>     | ILMN_12025 | NM_006138.4    | 1.81966477  | 1.178663506 | 0.00024345 |
| <i>MOSC1</i>     | ILMN_12517 | NM_022746.2    | 1.80056635  | 1.08435644  | 0.00199068 |
| <i>ARFIP1</i>    | ILMN_15855 | NM_014447.2    | 1.797399489 | 1.367232965 | 0.00009893 |
| <i>RNASE6</i>    | ILMN_14848 | NM_005615.2    | 1.790511733 | 1.572275665 | 0.00000278 |
| <i>C14orf106</i> | ILMN_5745  | NM_018353.3    | 1.777748886 | 1.422897874 | 0.00001448 |
| <i>CEBPA</i>     | ILMN_27029 | NM_004364.2    | 1.714680868 | 1.690296094 | 0.00004032 |
| <i>GIYD2</i>     | ILMN_25461 | NM_178044.1    | 1.710230986 | 1.724065013 | 0.00000013 |
| <i>SEPX1</i>     | ILMN_7309  | NM_016332.2    | 1.693931767 | 1.463290318 | 0.00024722 |
| <i>MOSPD2</i>    | ILMN_28307 | NM_152581.1    | 1.686127391 | 1.195339716 | 0.00096150 |
| <i>CPNE8</i>     | ILMN_20089 | NM_153634.2    | 1.676253065 | 1.272978087 | 0.00015784 |
| <i>CGI-38</i>    | ILMN_754   | NM_015964.2    | 1.670439728 | 1.419306976 | 0.00022466 |
| <i>FAM26B</i>    | ILMN_19907 | NM_015916.3    | 1.667037179 | 1.502766599 | 0.00009401 |
| <i>CD1A</i>      | ILMN_21799 | NM_001763.1    | 1.654779216 | 1.541206072 | 0.00002028 |
| <i>ASGR1</i>     | ILMN_17580 | NM_001671.2    | 1.642663186 | 1.127094292 | 0.00205181 |
| <i>SLIC1</i>     | ILMN_511   | NM_182854.1    | 1.636866235 | 2.299482343 | 0.00000086 |
| <i>RTN1</i>      | ILMN_5569  | NM_206857.1    | 1.630076214 | 0.889419362 | 0.00527996 |

|                 |            |                |             |             |            |
|-----------------|------------|----------------|-------------|-------------|------------|
| <i>APAF1</i>    | ILMN_886   | NM_181869.1    | 1.618807555 | 1.254949416 | 0.00092721 |
| <i>M6PR</i>     | ILMN_1682  | NM_002355.2    | 1.618699365 | 1.266933529 | 0.00292618 |
| <i>CD33</i>     | ILMN_24441 | NM_001772.2    | 1.617540554 | 1.279741937 | 0.00041582 |
| <i>SLC25A24</i> | ILMN_15753 | NM_013386.2    | 1.615632189 | 2.428121735 | 0.00000001 |
| <i>CDK5RAP3</i> | ILMN_11403 | NM_176095.1    | 1.615563142 | 1.296025136 | 0.00057345 |
| <i>C10orf26</i> | ILMN_28562 | NM_017787.3    | 1.595433956 | 1.558311538 | 0.00006121 |
| <i>FN5</i>      | ILMN_9654  | NM_020179.1    | 1.593991929 | 1.803744426 | 0.00000975 |
| <i>CYSLTR1</i>  | ILMN_6966  | NM_006639.2    | 1.584931332 | 1.485848853 | 0.00001350 |
| <i>GPR177</i>   | ILMN_2573  | NM_001002292.1 | 1.562854266 | 1.082985034 | 0.00014765 |
| <i>NPL</i>      | ILMN_25291 | NM_030769.1    | 1.562676534 | 1.43823841  | 0.00002591 |
| <i>VPS35</i>    | ILMN_21093 | NM_018206.3    | 1.558138081 | 1.255233608 | 0.00041318 |
| <i>CARD9</i>    | ILMN_22365 | NM_052813.2    | 1.55061094  | 0.937118385 | 0.00505249 |
| <i>CASP1</i>    | ILMN_10621 | NM_033294.2    | 1.544866623 | 1.590869349 | 0.00000234 |
| <i>SAMD9L</i>   | ILMN_27133 | NM_152703.2    | 1.536758823 | 1.039672893 | 0.00453992 |
| <i>PRDX3</i>    | ILMN_13029 | NM_014098.2    | 1.530538083 | 2.621818437 | 0.00000001 |
| <i>LILRA5</i>   | ILMN_13562 | NM_181986.1    | 1.528860757 | 0.798056866 | 0.00158893 |
| <i>OSCAR</i>    | ILMN_3784  | NM_130771.2    | 1.518568683 | 1.005731609 | 0.00099353 |
| <i>PFC</i>      | ILMN_24742 | NM_002621.1    | 1.501891159 | 1.020923486 | 0.00072327 |
| <i>PARP9</i>    | ILMN_12926 | NM_031458.1    | 1.501029114 | 1.241277617 | 0.00003846 |
| <i>SNX27</i>    | ILMN_17828 | NM_030918.5    | 1.498350472 | 1.290904726 | 0.00039031 |
| <i>PRAM1</i>    | ILMN_14804 | NM_032152.3    | 1.495831227 | 0.983108985 | 0.00085923 |
| <i>STK3</i>     | ILMN_26935 | NM_006281.1    | 1.487965795 | 1.169490975 | 0.00043491 |
| <i>AP1S2</i>    | ILMN_3812  | NM_003916.3    | 1.481318788 | 1.497126236 | 0.00001992 |
| <i>LACTB2</i>   | ILMN_18082 | NM_016027.1    | 1.478527427 | 0.919008169 | 0.00279394 |
| <i>TUBB</i>     | ILMN_23399 | NM_178014.2    | 1.468843269 | 1.281248771 | 0.00012956 |
| <i>CAMK1</i>    | ILMN_21373 | NM_003656.3    | 1.465942141 | 1.328031684 | 0.00004837 |
| <i>TLR10</i>    | ILMN_6615  | NM_030956.2    | 1.465748435 | 0.652237676 | 0.00819716 |
| <i>RAB37</i>    | ILMN_8592  | NM_001006638.1 | 1.459212098 | 1.176481542 | 0.00100970 |
| <i>CYBRD1</i>   | ILMN_4649  | NM_024843.2    | 1.458125986 | 1.268588969 | 0.00052254 |
| <i>ANP32C</i>   | ILMN_11992 | NM_012403.1    | 1.453611232 | 0.954665537 | 0.00066597 |
| <i>NAGK</i>     | ILMN_4544  | NM_017567.2    | 1.451197882 | 1.58243748  | 0.00000213 |

|                  |             |                |             |             |            |
|------------------|-------------|----------------|-------------|-------------|------------|
| <i>TMEM55A</i>   | ILMN_7212   | NM_018710.1    | 1.444584606 | 0.878598912 | 0.00771716 |
| <i>CEPT1</i>     | ILMN_14637  | NM_006090.3    | 1.444163158 | 2.02435451  | 0.00000063 |
| <i>PECAM1</i>    | ILMN_7862   | NM_000442.2    | 1.438004735 | 1.83143722  | 0.00000478 |
| <i>CD74</i>      | ILMN_21963  | NM_001025159.1 | 1.434686147 | 0.972479846 | 0.00394973 |
| <i>LOC201895</i> | ILMN_6140   | NM_174921.1    | 1.431649983 | 1.617044642 | 0.00005280 |
| <i>WDR68</i>     | ILMN_17716  | NM_005828.2    | 1.429422312 | 1.385745393 | 0.00028199 |
| <i>METTL3</i>    | ILMN_13907  | NM_019852.2    | 1.42548153  | 0.91222508  | 0.00603552 |
| <i>LSM12</i>     | ILMN_1510   | NM_152344.1    | 1.421361357 | 1.494939354 | 0.00046771 |
| <i>RAB10</i>     | ILMN_21971  | NM_016131.2    | 1.417506897 | 1.724175804 | 0.00004435 |
| <i>RAB27A</i>    | ILMN_26122  | NM_004580.3    | 1.415857452 | 2.439981834 | 0.00000007 |
| <i>PAK1</i>      | ILMN_3895   | NM_002576.3    | 1.415428263 | 1.303528125 | 0.00000166 |
| <i>CYBB</i>      | ILMN_13274  | NM_000397.2    | 1.408817731 | 1.339757578 | 0.00001259 |
| <i>GLCE</i>      | ILMN_19408  | NM_015554.1    | 1.404828092 | 1.161063267 | 0.00063160 |
| <i>DAPK1</i>     | ILMN_138506 | NM_004938.1    | 1.383669259 | 1.109733929 | 0.00016452 |
| <i>S100Z</i>     | ILMN_16143  | NM_130772.1    | 1.382269138 | 0.991665875 | 0.00036217 |
| <i>STX7</i>      | ILMN_23974  | NM_003569.1    | 1.38222876  | 1.653208921 | 0.00002049 |
| <i>RNF135</i>    | ILMN_26639  | NM_032322.3    | 1.38208812  | 1.298243602 | 0.00018183 |
| <i>GOLPH3L</i>   | ILMN_29707  | NM_018178.3    | 1.370986633 | 1.36453176  | 0.00063959 |
| <i>TST</i>       | ILMN_24453  | NM_003312.4    | 1.369690016 | 1.136440543 | 0.00095333 |
| <i>SNX10</i>     | ILMN_21992  | NM_013322.2    | 1.367198902 | 1.206295261 | 0.00011743 |
| <i>ZNF537</i>    | ILMN_19320  | NM_020856.1    | 1.364283648 | 0.983156622 | 0.00049673 |
| <i>DPYD</i>      | ILMN_19002  | NM_000110.2    | 1.360575553 | 1.221184847 | 0.00020880 |
| <i>THOC3</i>     | ILMN_17969  | NM_032361.1    | 1.337370852 | 1.296516098 | 0.00010001 |
| <i>JAK2</i>      | ILMN_12566  | NM_004972.2    | 1.336837147 | 1.157759338 | 0.00107764 |
| <i>CBR4</i>      | ILMN_15505  | NM_032783.3    | 1.331554916 | 0.924736371 | 0.00572523 |
| <i>C6orf150</i>  | ILMN_18812  | NM_138441.1    | 1.328798487 | 1.273871485 | 0.00029292 |
| <i>CNN2</i>      | ILMN_26898  | NM_004368.2    | 1.328259599 | 0.862321574 | 0.00400179 |
| <i>FGR</i>       | ILMN_21930  | NM_005248.1    | 1.327363076 | 1.39145794  | 0.00019357 |
| <i>CHN2</i>      | ILMN_16218  | NM_004067.1    | 1.324958877 | 1.614430996 | 0.00000029 |
| <i>AMICA1</i>    | ILMN_14597  | NM_153206.1    | 1.319782187 | 1.08065251  | 0.00325652 |
| <i>ZFP106</i>    | ILMN_6305   | NM_022473.1    | 1.319592806 | 1.607493451 | 0.00000090 |

|                  |             |                |             |             |            |
|------------------|-------------|----------------|-------------|-------------|------------|
| <i>IGSF6</i>     | ILMN_7979   | NM_005849.1    | 1.319368591 | 1.188636367 | 0.00037148 |
| <i>AP1S1</i>     | ILMN_21653  | NM_001283.2    | 1.318735553 | 1.576995383 | 0.00001459 |
| <i>MCTP1</i>     | ILMN_2499   | NM_001002796.1 | 1.315723721 | 1.202471994 | 0.00013997 |
| <i>ALDH3B1</i>   | ILMN_26797  | NM_001030010.1 | 1.312159263 | 0.893300708 | 0.00194706 |
| <i>NFE2L3</i>    | ILMN_21009  | NM_004289.5    | 1.308752905 | 1.300277296 | 0.00001069 |
| <i>MDM4</i>      | ILMN_137381 | NM_002393.1    | 1.297256916 | 1.26641401  | 0.00155630 |
| <i>RP2</i>       | ILMN_28618  | NM_006915.1    | 1.294332883 | 1.424661662 | 0.00003362 |
| <i>SLC35A1</i>   | ILMN_23284  | NM_006416.2    | 1.290268239 | 1.163704098 | 0.00047859 |
| <i>KIAA1598</i>  | ILMN_4741   | NM_018330.3    | 1.288926615 | 0.849412435 | 0.00370318 |
| <i>IL10RB</i>    | ILMN_26097  | NM_000628.3    | 1.287949998 | 1.719776558 | 0.00000093 |
| <i>HNRPK</i>     | ILMN_16515  | NM_031263.1    | 1.282519412 | 1.010295796 | 0.00375171 |
| <i>NUDT16</i>    | ILMN_16023  | NM_152395.1    | 1.281298901 | 1.154766657 | 0.00007469 |
| <i>SLC35B3</i>   | ILMN_20545  | NM_015948.2    | 1.278877271 | 1.051639038 | 0.00421060 |
| <i>LAT2</i>      | ILMN_137018 | NM_022040.2    | 1.275195973 | 1.42216122  | 0.00000064 |
| <i>ZNF467</i>    | ILMN_11856  | NM_207336.1    | 1.270946259 | 0.848454305 | 0.00395545 |
| <i>SIRPB1</i>    | ILMN_12074  | NM_006065.1    | 1.270200218 | 1.037567054 | 0.00175406 |
| <i>TUBA3</i>     | ILMN_1089   | NM_006009.2    | 1.267592173 | 1.335001342 | 0.00049465 |
| <i>IMPA2</i>     | ILMN_19881  | NM_014214.1    | 1.265450116 | 1.022773847 | 0.00125011 |
| <i>FLJ11151</i>  | ILMN_19186  | NM_018340.1    | 1.261665971 | 0.765786817 | 0.00229595 |
| <i>ZDHHC1</i>    | ILMN_29630  | NM_013304.1    | 1.261345131 | 1.08082457  | 0.00052442 |
| <i>MLKL</i>      | ILMN_25241  | NM_152649.1    | 1.253941489 | 1.285259718 | 0.00022319 |
| <i>SLC35A5</i>   | ILMN_26894  | NM_017945.2    | 1.252447978 | 1.715944373 | 0.00001005 |
| <i>CRLF3</i>     | ILMN_22668  | NM_015986.2    | 1.248375429 | 1.206829585 | 0.00060933 |
| <i>LOC387921</i> | ILMN_1273   | NM_001017370.1 | 1.244008484 | 1.120913984 | 0.00296565 |
| <i>PPP1CA</i>    | ILMN_26836  | NM_002708.3    | 1.243778007 | 1.055486121 | 0.00011791 |
| <i>SH2D3C</i>    | ILMN_8703   | NM_170600.1    | 1.243559889 | 1.020589358 | 0.00398947 |
| <i>AGPAT2</i>    | ILMN_6967   | NM_006412.3    | 1.241156729 | 1.437884834 | 0.00000131 |
| <i>PYCARD</i>    | ILMN_1146   | NM_145183.1    | 1.238338965 | 1.182704229 | 0.00014653 |
| <i>OXR1</i>      | ILMN_16599  | NM_181354.3    | 1.233515739 | 0.943498189 | 0.00535975 |
| <i>LOC90693</i>  | ILMN_24365  | NM_138771.2    | 1.228511696 | 1.070906703 | 0.00065741 |
| <i>EMR1</i>      | ILMN_12984  | NM_001974.3    | 1.228478331 | 1.205910733 | 0.00011219 |



|                  |             |             |             |             |            |
|------------------|-------------|-------------|-------------|-------------|------------|
| <i>ATG7</i>      | ILMN_17242  | NM_006395.1 | 1.226054413 | 1.111371355 | 0.00154238 |
| <i>HSD17B4</i>   | ILMN_23623  | NM_000414.1 | 1.224568967 | 1.201685613 | 0.00127922 |
| <i>APLP2</i>     | ILMN_19935  | NM_001642.1 | 1.221058814 | 0.783961377 | 0.00495608 |
| <i>LYST</i>      | ILMN_22965  | NM_000081.2 | 1.220189239 | 0.990799094 | 0.00387086 |
| <i>FKBP1A</i>    | ILMN_29213  | NM_054014.1 | 1.216668016 | 1.266978955 | 0.00058410 |
| <i>TCHP</i>      | ILMN_2569   | NM_032300.2 | 1.214228384 | 0.967657406 | 0.00841717 |
| <i>PTPN6</i>     | ILMN_9886   | NM_080549.2 | 1.213176953 | 1.147626146 | 0.00039216 |
| <i>ABHD3</i>     | ILMN_4359   | NM_138340.3 | 1.21305899  | 1.376526741 | 0.00032576 |
| <i>HS1BP3</i>    | ILMN_1874   | NM_022460.3 | 1.210718089 | 1.58016919  | 0.00000566 |
| <i>YIPF4</i>     | ILMN_16255  | NM_032312.2 | 1.209690086 | 1.346340866 | 0.00002704 |
| <i>MTMR11</i>    | ILMN_137079 | NM_181873.1 | 1.202420707 | 1.348571747 | 0.00095883 |
| <i>TPARL</i>     | ILMN_13352  | NM_018475.2 | 1.200728921 | 1.062854741 | 0.00112553 |
| <i>TRIM5</i>     | ILMN_29177  | NM_033092.1 | 1.19730344  | 2.098332255 | 0.00000187 |
| <i>CSF1R</i>     | ILMN_24980  | NM_005211.2 | 1.193143878 | 1.081173199 | 0.00499259 |
| <i>SLC44A1</i>   | ILMN_22168  | NM_022109.2 | 1.191671935 | 1.6856574   | 0.00002035 |
| <i>PCMT1</i>     | ILMN_26580  | NM_005389.1 | 1.19084514  | 1.252373441 | 0.00023097 |
| <i>C5orf14</i>   | ILMN_16829  | NM_024715.2 | 1.190668971 | 1.20283815  | 0.00007608 |
| <i>GIT2</i>      | ILMN_14647  | NM_139201.1 | 1.190219346 | 2.052595042 | 0.00000291 |
| <i>KIAA0513</i>  | ILMN_21473  | NM_014732.2 | 1.174748258 | 1.266650575 | 0.00002434 |
| <i>FAF1</i>      | ILMN_25532  | NM_007051.2 | 1.174568781 | 1.118849274 | 0.00281882 |
| <i>TSPAN3</i>    | ILMN_10474  | NM_005724.4 | 1.168225827 | 0.729580845 | 0.00438404 |
| <i>TFCP2</i>     | ILMN_22607  | NM_005653.3 | 1.167647033 | 1.658661194 | 0.00005819 |
| <i>TMLHE</i>     | ILMN_29460  | NM_018196.1 | 1.16485678  | 2.051181476 | 0.00000234 |
| <i>SDHA</i>      | ILMN_22058  | NM_004168.1 | 1.161938606 | 1.022608707 | 0.00073498 |
| <i>C14orf147</i> | ILMN_22701  | NM_138288.2 | 1.160650505 | 1.112768537 | 0.00023392 |
| <i>ATP6V1A</i>   | ILMN_30226  | NM_001690.2 | 1.15746526  | 1.754474554 | 0.00001328 |
| <i>LTA4H</i>     | ILMN_10760  | NM_000895.1 | 1.153598722 | 1.390108277 | 0.00003130 |
| <i>GIMAP2</i>    | ILMN_20526  | NM_015660.2 | 1.149577817 | 0.965671268 | 0.00193203 |
| <i>ME2</i>       | ILMN_2202   | NM_002396.3 | 1.147878625 | 1.509287926 | 0.00002005 |
| <i>GLB1</i>      | ILMN_23626  | NM_000404.1 | 1.146797283 | 1.690013295 | 0.00000041 |
| <i>KIAA0859</i>  | ILMN_17670  | NM_015935.4 | 1.144598554 | 0.837769761 | 0.00626361 |

|                  |             |                |             |             |            |
|------------------|-------------|----------------|-------------|-------------|------------|
| <b>HHEX</b>      | ILMN_137681 | NM_002729.2    | 1.141884003 | 0.693529229 | 0.00647935 |
| <b>IL15</b>      | ILMN_16803  | NM_172174.1    | 1.139875458 | 0.999399656 | 0.00054676 |
| <b>NUPL2</b>     | ILMN_2154   | NM_007342.1    | 1.139731191 | 1.168744344 | 0.00024463 |
| <b>ACADM</b>     | ILMN_16589  | NM_000016.2    | 1.13890795  | 0.924374337 | 0.00767478 |
| <b>DHRS4</b>     | ILMN_10152  | NM_021004.2    | 1.137404903 | 1.634207884 | 0.00000856 |
| <b>GLRX</b>      | ILMN_22606  | NM_002064.1    | 1.133988741 | 1.803719876 | 0.00005402 |
| <b>HIATL1</b>    | ILMN_445    | NM_032558.1    | 1.128469227 | 1.556990239 | 0.00000072 |
| <b>STAT1</b>     | ILMN_29640  | NM_007315.2    | 1.128402116 | 1.08223707  | 0.00124515 |
| <b>RB1</b>       | ILMN_4636   | NM_000321.1    | 1.124836729 | 1.187181876 | 0.00086606 |
| <b>BTK</b>       | ILMN_28021  | NM_000061.1    | 1.122372599 | 1.306551293 | 0.00018635 |
| <b>GBGT1</b>     | ILMN_18833  | NM_021996.3    | 1.120301613 | 1.09684158  | 0.00144302 |
| <b>MDFIC</b>     | ILMN_21649  | NM_199072.2    | 1.120203591 | 1.15768588  | 0.00176315 |
| <b>EVI2B</b>     | ILMN_26505  | NM_006495.2    | 1.114183272 | 1.318566703 | 0.00003204 |
| <b>ATP6V1D</b>   | ILMN_26737  | NM_015994.2    | 1.113501319 | 2.043668244 | 0.00000211 |
| <b>TRAPPC6B</b>  | ILMN_28066  | NM_177452.2    | 1.113453002 | 1.012610594 | 0.00117111 |
| <b>DYNC1I2</b>   | ILMN_26959  | NM_001378.1    | 1.113242907 | 1.315746836 | 0.00011227 |
| <b>CAT</b>       | ILMN_13962  | NM_001752.2    | 1.110401051 | 1.241457245 | 0.00015781 |
| <b>SAP18</b>     | ILMN_27996  | NM_005870.3    | 1.110157199 | 1.287921816 | 0.00045564 |
| <b>RASSF4</b>    | ILMN_1013   | NM_178145.1    | 1.106395735 | 0.702632647 | 0.00971813 |
| <b>TIPRL</b>     | ILMN_13476  | NM_152902.3    | 1.105926761 | 0.735464056 | 0.00753054 |
| <b>GNAQ</b>      | ILMN_18320  | NM_002072.2    | 1.102538482 | 1.09049864  | 0.00052488 |
| <b>GART</b>      | ILMN_19282  | NM_175085.1    | 1.100182823 | 1.860993741 | 0.00000013 |
| <b>RNUT1</b>     | ILMN_3859   | NM_005701.2    | 1.098669993 | 1.252489255 | 0.00000760 |
| <b>RSHL2</b>     | ILMN_20992  | NM_031924.3    | 1.098121903 | 1.201616713 | 0.00061853 |
| <b>STAT1</b>     | ILMN_11054  | NM_139266.1    | 1.092967271 | 1.242374651 | 0.00019968 |
| <b>LOC147804</b> | ILMN_772    | NM_001010856.1 | 1.09060459  | 0.93550762  | 0.00192963 |
| <b>GBP1</b>      | ILMN_28413  | NM_002053.1    | 1.088077859 | 0.818098264 | 0.00455937 |
| <b>P2RY5</b>     | ILMN_1003   | NM_005767.3    | 1.084060495 | 0.944354401 | 0.00168605 |
| <b>TSNAX</b>     | ILMN_9331   | NM_005999.2    | 1.083748338 | 0.920206882 | 0.00344845 |
| <b>MSRB2</b>     | ILMN_1402   | NM_012228.2    | 1.082512282 | 1.138598039 | 0.00026016 |
| <b>MAX</b>       | ILMN_1660   | NM_197957.2    | 1.080956724 | 1.359650229 | 0.00089655 |

|                  |             |                |             |             |            |
|------------------|-------------|----------------|-------------|-------------|------------|
| <i>DHRS4L2</i>   | ILMN_18916  | NM_198083.1    | 1.0803122   | 1.833092933 | 0.00000279 |
| <i>CD300A</i>    | ILMN_20704  | NM_007261.2    | 1.077905816 | 1.233438261 | 0.00011805 |
| <i>HPS3</i>      | ILMN_27156  | NM_032383.3    | 1.077756305 | 1.166700056 | 0.00026715 |
| <i>Kua-UEV</i>   | ILMN_20084  | NM_199203.1    | 1.077210942 | 0.890045394 | 0.00418034 |
| <i>VRK2</i>      | ILMN_12895  | NM_006296.3    | 1.071093578 | 1.273308121 | 0.00006664 |
| <i>PIGF</i>      | ILMN_5303   | NM_173074.1    | 1.069955594 | 1.32315317  | 0.00196465 |
| <i>KIAA0907</i>  | ILMN_6810   | NM_014949.2    | 1.068392034 | 0.773879851 | 0.00546443 |
| <i>ITGA4</i>     | ILMN_20825  | NM_000885.4    | 1.064564534 | 1.296599118 | 0.00066087 |
| <i>C14orf100</i> | ILMN_2292   | NM_016475.2    | 1.062074722 | 1.549919473 | 0.00005950 |
| <i>C20orf55</i>  | ILMN_7928   | NM_031424.3    | 1.061601137 | 1.584276472 | 0.00005688 |
| <i>FLJ30655</i>  | ILMN_19208  | NM_144643.1    | 1.060282183 | 0.876173172 | 0.00111608 |
| <i>PEX11B</i>    | ILMN_20603  | NM_003846.1    | 1.06008193  | 1.153357146 | 0.00010047 |
| <i>RTN3</i>      | ILMN_20331  | NM_006054.2    | 1.057527171 | 1.028960785 | 0.00040536 |
| <i>TRPM4</i>     | ILMN_23519  | NM_017636.2    | 1.05591347  | 0.961545232 | 0.00029359 |
| <i>RHOT1</i>     | ILMN_7051   | NM_001033568.1 | 1.053669109 | 1.180698251 | 0.00005482 |
| <i>STX10</i>     | ILMN_14838  | NM_003765.1    | 1.052249524 | 1.128504094 | 0.00001413 |
| <i>COMMD10</i>   | ILMN_12276  | NM_016144.2    | 1.050382398 | 1.495031129 | 0.00001106 |
| <i>CD1C</i>      | ILMN_25152  | NM_001765.1    | 1.048258496 | 0.887735273 | 0.00455867 |
| <i>CTSS</i>      | ILMN_13149  | NM_004079.3    | 1.045734735 | 0.82615845  | 0.00252149 |
| <i>WARS</i>      | ILMN_25430  | NM_213646.1    | 1.04496961  | 1.189056087 | 0.00237587 |
| <i>KCNK6</i>     | ILMN_26070  | NM_004823.1    | 1.044519702 | 1.771355806 | 0.00000007 |
| <i>RGS19</i>     | ILMN_137691 | NM_005873.1    | 1.043344803 | 1.22908987  | 0.00190992 |
| <i>TRADD</i>     | ILMN_27933  | NM_003789.2    | 1.04251768  | 1.262244624 | 0.00001350 |
| <i>CTDSP1</i>    | ILMN_13739  | NM_182642.1    | 1.041515241 | 0.971166874 | 0.00278989 |
| <i>CHCHD4</i>    | ILMN_27470  | NM_144636.1    | 1.040667368 | 1.271820439 | 0.00115294 |
| <i>DPYSL2</i>    | ILMN_9671   | NM_001386.4    | 1.040441672 | 1.184566634 | 0.00043079 |
| <i>OSBPL11</i>   | ILMN_21883  | NM_022776.3    | 1.040366673 | 0.902785221 | 0.00280335 |
| <i>PPID</i>      | ILMN_7536   | NM_005038.2    | 1.040245336 | 0.920803978 | 0.00114088 |
| <i>KLRG1</i>     | ILMN_12613  | NM_005810.3    | 1.031994693 | 0.951340998 | 0.00551552 |
| <i>TNRC5</i>     | ILMN_25587  | NM_006586.2    | 1.031678935 | 1.226161091 | 0.00013477 |
| <i>C1orf25</i>   | ILMN_6315   | NM_030934.3    | 1.029790058 | 0.922590503 | 0.00311092 |

|                         |             |                |             |             |            |
|-------------------------|-------------|----------------|-------------|-------------|------------|
| <b><i>BTN3A3</i></b>    | ILMN_20620  | NM_006994.3    | 1.02955062  | 0.986674751 | 0.00505231 |
| <b><i>HMGCL</i></b>     | ILMN_18301  | NM_000191.2    | 1.028869289 | 0.988156967 | 0.00145224 |
| <b><i>RNASEL</i></b>    | ILMN_25186  | NM_021133.2    | 1.028462688 | 0.908939728 | 0.00343962 |
| <b><i>THRAP3</i></b>    | ILMN_5104   | NM_005119.2    | 1.027723448 | 1.15862836  | 0.00424330 |
| <b><i>ERICH1</i></b>    | ILMN_15474  | NM_207332.1    | 1.02729451  | 1.505330849 | 0.00008397 |
| <b><i>SETD3</i></b>     | ILMN_27724  | NM_199123.1    | 1.026914874 | 1.847519372 | 0.00000848 |
| <b><i>LOC339745</i></b> | ILMN_21364  | NM_001001664.1 | 1.025194    | 1.043785199 | 0.00044059 |
| <b><i>SYK</i></b>       | ILMN_8126   | NM_003177.3    | 1.02306596  | 1.069140141 | 0.00058954 |
| <b><i>LYPLAL1</i></b>   | ILMN_25005  | NM_138794.1    | 1.021749864 | 1.274393317 | 0.00017061 |
| <b><i>CXorf38</i></b>   | ILMN_24514  | NM_144970.1    | 1.018860976 | 0.993458358 | 0.00153043 |
| <b><i>MFSD1</i></b>     | ILMN_29705  | NM_022736.1    | 1.016547521 | 0.960614309 | 0.00809506 |
| <b><i>COG5</i></b>      | ILMN_10374  | NM_006348.2    | 1.014274311 | 0.882601775 | 0.00214891 |
| <b><i>CTSC</i></b>      | ILMN_14007  | NM_001814.2    | 1.01344871  | 1.853389446 | 0.00000125 |
| <b><i>ARSD</i></b>      | ILMN_23258  | NM_001669.2    | 1.013248964 | 1.084414068 | 0.00009669 |
| <b><i>C10orf78</i></b>  | ILMN_1251   | NM_145247.4    | 1.009571689 | 0.988084592 | 0.00097754 |
| <b><i>IHPK2</i></b>     | ILMN_4437   | NM_001005911.1 | 1.00704733  | 0.951288743 | 0.00714339 |
| <b><i>MGST2</i></b>     | ILMN_8759   | NM_002413.3    | 1.006871413 | 0.89556421  | 0.00323860 |
| <b><i>PQLC3</i></b>     | ILMN_138926 | NM_152391.2    | 1.006106122 | 1.472969297 | 0.00001380 |
| <b><i>APIP</i></b>      | ILMN_15379  | NM_015957.1    | 1.004926744 | 1.433668335 | 0.00000145 |
| <b><i>FES</i></b>       | ILMN_27340  | NM_002005.2    | 1.002838995 | 1.0193433   | 0.00138719 |
| <b><i>LOC51136</i></b>  | ILMN_27239  | NM_016125.2    | 1.002029878 | 1.193124036 | 0.00048848 |
| <b><i>C1orf162</i></b>  | ILMN_19455  | NM_174896.2    | 0.99955481  | 1.402962342 | 0.00028599 |
| <b><i>LOC441268</i></b> | ILMN_18016  | NM_001013725.1 | 0.996288768 | 1.130499126 | 0.00002006 |
| <b><i>GCNT1</i></b>     | ILMN_28747  | NM_001490.3    | 0.995457433 | 0.869013003 | 0.00381332 |
| <b><i>ARL6IP6</i></b>   | ILMN_11477  | NM_152522.2    | 0.994288632 | 1.477088131 | 0.00001328 |
| <b><i>OAZ2</i></b>      | ILMN_28141  | NM_002537.1    | 0.994156749 | 1.166412733 | 0.00001391 |
| <b><i>FLJ40142</i></b>  | ILMN_5279   | NM_207435.1    | 0.993492071 | 1.165314596 | 0.00045441 |
| <b><i>SP1</i></b>       | ILMN_23737  | NM_138473.2    | 0.993032055 | 1.260719548 | 0.00015175 |
| <b><i>ATG3</i></b>      | ILMN_18856  | NM_022488.3    | 0.988228041 | 1.916410319 | 0.00000002 |
| <b><i>LYL1</i></b>      | ILMN_18317  | NM_005583.3    | 0.987845869 | 1.06009773  | 0.00044087 |
| <b><i>ASPHD2</i></b>    | ILMN_16388  | NM_020437.3    | 0.984948065 | 1.845832042 | 0.00000932 |

|                  |             |                |             |             |            |
|------------------|-------------|----------------|-------------|-------------|------------|
| <i>DTYMK</i>     | ILMN_13450  | NM_012145.2    | 0.984864928 | 1.210032184 | 0.00035093 |
| <i>PIGV</i>      | ILMN_3048   | NM_017837.2    | 0.978814247 | 0.991495087 | 0.00284743 |
| <i>PROSC</i>     | ILMN_23472  | NM_007198.2    | 0.977585431 | 1.202805016 | 0.00047291 |
| <i>CIDEB</i>     | ILMN_11569  | NM_014430.1    | 0.977506182 | 1.25429654  | 0.00018715 |
| <i>SIRPB2</i>    | ILMN_26592  | NM_018556.2    | 0.977420368 | 0.697565081 | 0.00999559 |
| <i>C20orf155</i> | ILMN_14031  | NM_019095.3    | 0.976876389 | 1.396760216 | 0.00013889 |
| <i>C3orf1</i>    | ILMN_7612   | NM_016589.3    | 0.973048163 | 1.328604302 | 0.00090971 |
| <i>NAGA</i>      | ILMN_21273  | NM_000262.1    | 0.972941111 | 0.743299601 | 0.00545547 |
| <i>NUP214</i>    | ILMN_29992  | NM_005085.2    | 0.972928088 | 1.043626148 | 0.00010851 |
| <i>MTPN</i>      | ILMN_28124  | NM_145808.1    | 0.967281848 | 1.009440702 | 0.00033972 |
| <i>SUCLA2</i>    | ILMN_5448   | NM_003850.1    | 0.966750454 | 1.204571152 | 0.00003408 |
| <i>RNF14</i>     | ILMN_4655   | NM_004290.3    | 0.965790647 | 1.08994806  | 0.00023317 |
| <i>SPCS3</i>     | ILMN_14718  | NM_021928.1    | 0.965416591 | 1.255510062 | 0.00001553 |
| <i>IL17R</i>     | ILMN_19124  | NM_014339.3    | 0.964912628 | 0.686029738 | 0.00622337 |
| <i>C7orf24</i>   | ILMN_2391   | NM_024051.2    | 0.962521409 | 1.580715796 | 0.00000269 |
| <i>ATP8B4</i>    | ILMN_20882  | NM_024837.2    | 0.960699332 | 1.080063592 | 0.00398716 |
| <i>GENTB2</i>    | ILMN_8806   | NM_012287.3    | 0.960173513 | 0.856922854 | 0.00407885 |
| <i>ETNK1</i>     | ILMN_137282 | NM_018638.3    | 0.960101883 | 1.078610828 | 0.00061539 |
| <i>C8orf70</i>   | ILMN_13979  | NM_016010.1    | 0.957844064 | 0.932397929 | 0.00250075 |
| <i>SLC33A1</i>   | ILMN_18559  | NM_004733.2    | 0.95284096  | 0.836978907 | 0.00891011 |
| <i>MINPP1</i>    | ILMN_29353  | NM_004897.2    | 0.952445582 | 0.841313401 | 0.00437668 |
| <i>FLJ32028</i>  | ILMN_2086   | NM_152680.1    | 0.951166051 | 1.157097549 | 0.00059476 |
| <i>TMEM69</i>    | ILMN_22324  | NM_016486.2    | 0.94461557  | 1.735210786 | 0.00000014 |
| <i>TCEA1</i>     | ILMN_15877  | NM_006756.2    | 0.943962517 | 1.032769437 | 0.00032666 |
| <i>ZFYVE21</i>   | ILMN_1317   | NM_024071.2    | 0.939951758 | 1.266235738 | 0.00060070 |
| <i>C1GALT1C1</i> | ILMN_14223  | NM_001011551.1 | 0.939682644 | 1.268820331 | 0.00042353 |
| <i>MRPL18</i>    | ILMN_14120  | NM_014161.2    | 0.939047175 | 1.211864841 | 0.00003859 |
| <i>COMMD8</i>    | ILMN_16165  | NM_017845.2    | 0.938884957 | 1.211204735 | 0.00004943 |
| <i>SUOX</i>      | ILMN_25326  | NM_001032386.1 | 0.938099751 | 1.116839515 | 0.00021507 |
| <i>SEC23IP</i>   | ILMN_7522   | NM_007190.2    | 0.935305956 | 1.050976614 | 0.00162119 |
| <i>SLC27A3</i>   | ILMN_820    | NM_024330.1    | 0.929556446 | 1.03995997  | 0.00420275 |

|                  |             |                |             |             |            |
|------------------|-------------|----------------|-------------|-------------|------------|
| <i>TRFP</i>      | ILMN_10817  | NM_004275.3    | 0.927887255 | 1.031529777 | 0.00025827 |
| <i>RAB24</i>     | ILMN_21668  | NM_130781.1    | 0.925882602 | 1.376496871 | 0.00034727 |
| <i>ARRB1</i>     | ILMN_7318   | NM_004041.3    | 0.925483191 | 1.287394226 | 0.00045584 |
| <i>OMA1</i>      | ILMN_29719  | NM_145243.3    | 0.923738733 | 1.043094562 | 0.00683567 |
| <i>MGC39633</i>  | ILMN_25725  | NM_152549.1    | 0.922176038 | 0.766026212 | 0.00863450 |
| <i>NIF3L1</i>    | ILMN_20423  | NM_021824.2    | 0.921438655 | 0.937519896 | 0.00512003 |
| <i>SPTLC1</i>    | ILMN_10107  | NM_006415.2    | 0.920711882 | 1.135911491 | 0.00084213 |
| <i>RAB28</i>     | ILMN_13007  | NM_001017979.1 | 0.920578297 | 0.870380016 | 0.00570634 |
| <i>ICAM2</i>     | ILMN_12334  | NM_000873.2    | 0.918459715 | 1.379872474 | 0.00003721 |
| <i>BET1</i>      | ILMN_137098 | NM_005868.3    | 0.915908909 | 1.015505469 | 0.00049841 |
| <i>DPAGT1</i>    | ILMN_10306  | NM_001382.2    | 0.914750765 | 1.37671312  | 0.00026551 |
| <i>MAPK1</i>     | ILMN_1351   | NM_138957.2    | 0.912944589 | 1.973641533 | 0.00000218 |
| <i>CREB1</i>     | ILMN_4653   | NM_004379.2    | 0.912153152 | 1.289898949 | 0.00000751 |
| <i>FLJ11806</i>  | ILMN_22941  | NM_024824.3    | 0.907043224 | 0.872607897 | 0.00251841 |
| <i>GBP4</i>      | ILMN_2749   | NM_052941.2    | 0.906318346 | 0.884424018 | 0.00165022 |
| <i>UBE1C</i>     | ILMN_22726  | NM_198197.1    | 0.906055038 | 1.312237849 | 0.00001150 |
| <i>HTATIP2</i>   | ILMN_16008  | NM_006410.3    | 0.90509346  | 0.948238591 | 0.00323868 |
| <i>DNCL1</i>     | ILMN_137049 | NM_003746.1    | 0.904688718 | 1.039220175 | 0.00434549 |
| <i>ATG16L2</i>   | ILMN_16649  | NM_033388.1    | 0.904500406 | 0.687753427 | 0.00455909 |
| <i>RAB28</i>     | ILMN_23100  | NM_004249.1    | 0.904454284 | 1.247203021 | 0.00004258 |
| <i>SDHD</i>      | ILMN_6353   | NM_003002.1    | 0.903802405 | 0.915922902 | 0.00148158 |
| <i>CMAS</i>      | ILMN_21201  | NM_018686.3    | 0.901806436 | 1.556521592 | 0.00002760 |
| <i>SLC39A3</i>   | ILMN_27676  | NM_144564.4    | 0.899190336 | 1.175928733 | 0.00003123 |
| <i>GALK1</i>     | ILMN_18040  | NM_000154.1    | 0.896328132 | 1.079109296 | 0.00381481 |
| <i>TMEM60</i>    | ILMN_19683  | NM_032936.2    | 0.896262347 | 1.461391638 | 0.00006428 |
| <i>AHNAK</i>     | ILMN_28759  | NM_001620.1    | 0.893847691 | 0.663070451 | 0.00502640 |
| <i>SNX5</i>      | ILMN_3880   | NM_014426.2    | 0.89245185  | 0.888484828 | 0.00978382 |
| <i>TMED10</i>    | ILMN_4416   | NM_006827.4    | 0.888532499 | 1.15987317  | 0.00373153 |
| <i>MDM1</i>      | ILMN_12153  | NM_017440.2    | 0.885584244 | 1.052871085 | 0.00008682 |
| <i>LOC129531</i> | ILMN_27516  | NM_138798.1    | 0.884116434 | 1.128519561 | 0.00309031 |
| <i>MTSS1</i>     | ILMN_7083   | NM_014751.2    | 0.882192231 | 0.971455139 | 0.00044650 |

|                 |             |                |             |             |            |
|-----------------|-------------|----------------|-------------|-------------|------------|
| <i>FLJ20534</i> | ILMN_9467   | NM_017867.1    | 0.881491211 | 1.247739397 | 0.00032511 |
| <i>NACA</i>     | ILMN_17162  | NM_005594.2    | 0.879209492 | 1.329963923 | 0.00013907 |
| <i>GDI2</i>     | ILMN_15402  | NM_001494.2    | 0.876874596 | 1.421630896 | 0.00008006 |
| <i>SNX2</i>     | ILMN_4948   | NM_003100.2    | 0.876247823 | 0.935068996 | 0.00051003 |
| <i>ARRDC1</i>   | ILMN_11748  | NM_152285.2    | 0.875635011 | 1.073875983 | 0.00011921 |
| <i>ARV1</i>     | ILMN_5909   | NM_022786.1    | 0.874609136 | 0.896227084 | 0.00931000 |
| <i>THAP1</i>    | ILMN_15754  | NM_018105.2    | 0.871272902 | 0.976199365 | 0.00181390 |
| <i>REEP5</i>    | ILMN_21319  | NM_005669.3    | 0.871021946 | 0.904693424 | 0.00161578 |
| <i>PHCA</i>     | ILMN_3836   | NM_018367.3    | 0.866524089 | 1.002767545 | 0.00079992 |
| <i>VAMP4</i>    | ILMN_139375 | NM_003762.2    | 0.865903861 | 1.174684728 | 0.00141188 |
| <i>RAB7</i>     | ILMN_30038  | NM_004637.5    | 0.861414853 | 1.222343087 | 0.00108071 |
| <i>COQ5</i>     | ILMN_6126   | NM_032314.2    | 0.859134948 | 0.991809815 | 0.00432292 |
| <i>TKT</i>      | ILMN_2726   | NM_001064.1    | 0.859005488 | 0.916255715 | 0.00097002 |
| <i>MDS025</i>   | ILMN_6208   | NM_021825.3    | 0.858810512 | 0.793814684 | 0.00814564 |
| <i>WDR40A</i>   | ILMN_29238  | NM_015397.1    | 0.857153805 | 0.981080156 | 0.00634603 |
| <i>NOMO1</i>    | ILMN_22691  | NM_014287.3    | 0.856327308 | 1.032285196 | 0.00044624 |
| <i>PLAC8</i>    | ILMN_17809  | NM_016619.1    | 0.853759799 | 0.772570372 | 0.00784848 |
| <i>UNC50</i>    | ILMN_19045  | NM_014044.4    | 0.853303767 | 1.843345515 | 0.00000260 |
| <i>TM9SF1</i>   | ILMN_1371   | NM_001014842.1 | 0.852681312 | 1.044733631 | 0.00020166 |
| <i>THEM2</i>    | ILMN_27212  | NM_018473.2    | 0.852676742 | 1.164355119 | 0.00142445 |
| <i>TRIP4</i>    | ILMN_10213  | NM_016213.3    | 0.849722307 | 1.77715718  | 0.00000087 |
| <i>MGC15875</i> | ILMN_28180  | NM_153373.1    | 0.848075084 | 0.773122313 | 0.00731177 |
| <i>CLK3</i>     | ILMN_1044   | NM_003992.1    | 0.845775564 | 0.958931247 | 0.00082384 |
| <i>CORO1A</i>   | ILMN_6768   | NM_007074.2    | 0.844780702 | 1.132107408 | 0.00013626 |
| <i>CRIP1</i>    | ILMN_12903  | NM_014171.3    | 0.844040876 | 1.202882939 | 0.00161066 |
| <i>SDFR1</i>    | ILMN_138444 | NM_012428.1    | 0.842592487 | 0.771466242 | 0.00266393 |
| <i>ATP6VOE</i>  | ILMN_8923   | NM_003945.3    | 0.841844604 | 1.529777909 | 0.00000753 |
| <i>TMCO3</i>    | ILMN_19218  | NM_017905.3    | 0.838962707 | 1.176980562 | 0.00451413 |
| <i>SNAP29</i>   | ILMN_20709  | NM_004782.2    | 0.836938792 | 1.255622288 | 0.00003215 |
| <i>NCK1</i>     | ILMN_13975  | NM_006153.3    | 0.833950007 | 0.911191822 | 0.00105238 |
| <i>SNX1</i>     | ILMN_924    | NM_003099.3    | 0.832963832 | 0.778505884 | 0.00455591 |

|                  |            |                |             |             |            |
|------------------|------------|----------------|-------------|-------------|------------|
| <i>PRKAR1A</i>   | ILMN_18925 | NM_002734.3    | 0.832024455 | 1.26445346  | 0.00085621 |
| <i>HLA-DPA1</i>  | ILMN_13606 | NM_033554.2    | 0.830818992 | 1.198741802 | 0.00006353 |
| <i>FKBP1A</i>    | ILMN_1290  | NM_000801.2    | 0.82816191  | 1.376397268 | 0.00068549 |
| <i>CHKB</i>      | ILMN_1067  | NM_005198.3    | 0.827517927 | 1.035599235 | 0.00183007 |
| <i>MGC16385</i>  | ILMN_5329  | NM_145039.2    | 0.8274803   | 0.794442997 | 0.00790513 |
| <i>ARPC4</i>     | ILMN_24112 | NM_001024959.1 | 0.82741729  | 1.300843186 | 0.00000283 |
| <i>C21orf33</i>  | ILMN_28752 | NM_004649.4    | 0.821418828 | 0.990826614 | 0.00317030 |
| <i>TES</i>       | ILMN_17251 | NM_015641.2    | 0.819022224 | 0.734094965 | 0.00560739 |
| <i>STT3A</i>     | ILMN_17585 | NM_152713.2    | 0.816670936 | 1.287957745 | 0.00003264 |
| <i>TMEM126B</i>  | ILMN_18826 | NM_018480.2    | 0.813364425 | 1.16222445  | 0.00148392 |
| <i>NDUFAF1</i>   | ILMN_13182 | NM_016013.2    | 0.810438154 | 1.268624194 | 0.00045587 |
| <i>WRB</i>       | ILMN_12263 | NM_004627.2    | 0.809280188 | 1.063669514 | 0.00039734 |
| <i>C17orf62</i>  | ILMN_12733 | NM_001033046.1 | 0.808445826 | 0.873210482 | 0.00057408 |
| <i>LOC339344</i> | ILMN_6535  | NM_001012643.2 | 0.80801784  | 0.88574801  | 0.00770728 |
| <i>UTRN</i>      | ILMN_15375 | NM_007124.1    | 0.806804848 | 1.062976949 | 0.00038025 |
| <i>YIF1B</i>     | ILMN_10933 | NM_001031731.1 | 0.805625909 | 0.827041041 | 0.00081460 |
| <i>WDR23</i>     | ILMN_11121 | NM_025230.3    | 0.80464906  | 0.713414493 | 0.00387877 |
| <i>CG018</i>     | ILMN_24274 | NM_052818.1    | 0.804367155 | 1.004875505 | 0.00158518 |
| <i>CCDC5</i>     | ILMN_18943 | NM_138443.2    | 0.803601045 | 0.811374754 | 0.00126376 |
| <i>MAP3K3</i>    | ILMN_426   | NM_203351.1    | 0.801573187 | 0.933775478 | 0.00008829 |
| <i>PAQR4</i>     | ILMN_20105 | NM_152341.2    | 0.80144963  | 0.85738589  | 0.00700293 |
| <i>RBM4</i>      | ILMN_11057 | NM_002896.1    | 0.800689376 | 1.000393552 | 0.00852204 |
| <i>FLJ10260</i>  | ILMN_454   | NM_018042.2    | 0.799519136 | 1.101275589 | 0.00004981 |
| <i>C14orf159</i> | ILMN_22928 | NM_024952.4    | 0.79931973  | 1.070855583 | 0.00137924 |
| <i>CRYZL1</i>    | ILMN_5113  | NM_005111.5    | 0.797728559 | 1.206417193 | 0.00010391 |
| <i>COQ9</i>      | ILMN_16451 | NM_020312.1    | 0.795958206 | 1.041376851 | 0.00209683 |
| <i>PCK2</i>      | ILMN_2603  | NM_004563.2    | 0.793276194 | 0.970467923 | 0.00068396 |
| <i>EXOSC3</i>    | ILMN_9043  | NM_016042.2    | 0.790073504 | 1.066489341 | 0.00024318 |
| <i>RER1</i>      | ILMN_16490 | NM_007033.2    | 0.788900128 | 1.091279047 | 0.00011252 |
| <i>TM9SF1</i>    | ILMN_1249  | NM_006405.5    | 0.788259179 | 1.468086787 | 0.00004208 |
| <i>ACN9</i>      | ILMN_6296  | NM_020186.1    | 0.787176157 | 0.883990806 | 0.00311959 |



|                 |             |                |             |             |            |
|-----------------|-------------|----------------|-------------|-------------|------------|
| <i>CTSO</i>     | ILMN_22132  | NM_001334.2    | 0.786911991 | 0.842038184 | 0.00148380 |
| <i>DHRS8</i>    | ILMN_12219  | NM_016245.2    | 0.784360455 | 0.788762086 | 0.00171737 |
| <i>MRPL30</i>   | ILMN_137901 | NM_145212.1    | 0.783716628 | 0.777905407 | 0.00207844 |
| <i>BANF1</i>    | ILMN_13154  | NM_003860.2    | 0.781911821 | 0.91109998  | 0.00759135 |
| <i>C10orf6</i>  | ILMN_24540  | NM_018121.2    | 0.78063571  | 0.697345556 | 0.00689460 |
| <i>HLA-F</i>    | ILMN_3012   | NM_018950.1    | 0.778737753 | 0.931623998 | 0.00211549 |
| <i>C7orf28B</i> | ILMN_8655   | NM_198097.1    | 0.777924185 | 0.933647594 | 0.00693097 |
| <i>KIAA0152</i> | ILMN_24410  | NM_014730.2    | 0.777856443 | 0.76897219  | 0.00436356 |
| <i>DSCR1</i>    | ILMN_3292   | NM_203417.1    | 0.776155691 | 0.909602389 | 0.00619489 |
| <i>UBE2G1</i>   | ILMN_4331   | NM_003342.4    | 0.776077148 | 1.539756439 | 0.00012246 |
| <i>AKR1A1</i>   | ILMN_18164  | NM_006066.2    | 0.775609482 | 1.438402297 | 0.00003774 |
| <i>RNPEP</i>    | ILMN_22895  | NM_020216.3    | 0.773848693 | 0.798178296 | 0.00210507 |
| <i>PDCD10</i>   | ILMN_26567  | NM_145859.1    | 0.773529175 | 0.734718047 | 0.00444282 |
| <i>TIA1</i>     | ILMN_29910  | NM_022173.1    | 0.771619932 | 1.012734353 | 0.00088562 |
| <i>C17orf40</i> | ILMN_18247  | NM_018428.2    | 0.770526096 | 1.085875486 | 0.00034219 |
| <i>GABPA</i>    | ILMN_28392  | NM_002040.2    | 0.769932318 | 0.918905978 | 0.00099307 |
| <i>TADA3L</i>   | ILMN_7198   | NM_006354.2    | 0.76569954  | 1.159110327 | 0.00058551 |
| <i>GNPAT</i>    | ILMN_15390  | NM_014236.1    | 0.765579192 | 1.098910095 | 0.00028603 |
| <i>IIP45</i>    | ILMN_12607  | NM_001025374.1 | 0.763584039 | 1.107873404 | 0.00010382 |
| <i>PSMA5</i>    | ILMN_15259  | NM_002790.2    | 0.762135923 | 1.581564317 | 0.00011433 |
| <i>SUMF1</i>    | ILMN_15497  | NM_182760.2    | 0.759267277 | 0.823262053 | 0.00496238 |
| <i>PDCD8</i>    | ILMN_20381  | NM_004208.2    | 0.757914227 | 1.319956996 | 0.00015773 |
| <i>SCO1</i>     | ILMN_14321  | NM_004589.1    | 0.757545888 | 1.364663218 | 0.00000441 |
| <i>DUSP18</i>   | ILMN_9044   | NM_152511.3    | 0.756268314 | 0.953020427 | 0.00032814 |
| <i>RAB24</i>    | ILMN_25731  | NM_001031677.1 | 0.754549224 | 0.988549939 | 0.00110535 |
| <i>DUSP3</i>    | ILMN_14523  | NM_004090.2    | 0.753530167 | 0.950437848 | 0.00581700 |
| <i>EPS15</i>    | ILMN_8810   | NM_001981.2    | 0.752852195 | 0.971791525 | 0.00324139 |
| <i>CCDC53</i>   | ILMN_25394  | NM_016053.1    | 0.752132981 | 1.108722086 | 0.00761538 |
| <i>RHBDD1</i>   | ILMN_13013  | NM_032276.2    | 0.749264488 | 1.440263385 | 0.00014650 |
| <i>UTP14A</i>   | ILMN_3222   | NM_006649.2    | 0.746978261 | 0.722920018 | 0.00572518 |
| <i>APOL3</i>    | ILMN_8572   | NM_030644.1    | 0.745532666 | 0.774795383 | 0.00253167 |

|                  |             |                |             |             |            |
|------------------|-------------|----------------|-------------|-------------|------------|
| <b>AHCYL1</b>    | ILMN_21551  | NM_006621.3    | 0.743721598 | 1.182785059 | 0.00012557 |
| <b>D15Wsu75e</b> | ILMN_13640  | NM_015704.1    | 0.743698121 | 1.437551529 | 0.00004606 |
| <b>FAM45A</b>    | ILMN_28113  | NM_207009.2    | 0.739449537 | 0.80784723  | 0.00076796 |
| <b>WDR58</b>     | ILMN_25260  | NM_024339.2    | 0.739211399 | 0.855804331 | 0.00209070 |
| <b>LMBRD1</b>    | ILMN_6684   | NM_018368.2    | 0.737434728 | 1.633121026 | 0.00000048 |
| <b>GMPR2</b>     | ILMN_15872  | NM_001002002.1 | 0.736748124 | 1.047904062 | 0.00098527 |
| <b>ACTL6A</b>    | ILMN_3186   | NM_177989.1    | 0.736251612 | 0.955844795 | 0.00063734 |
| <b>TP53I3</b>    | ILMN_2007   | NM_147184.1    | 0.735509717 | 0.697604939 | 0.00877149 |
| <b>BRD8</b>      | ILMN_10431  | NM_183359.1    | 0.735297102 | 0.808354111 | 0.00087882 |
| <b>LIPT1</b>     | ILMN_5728   | NM_145197.1    | 0.734857538 | 0.949720387 | 0.00015131 |
| <b>TMBIM4</b>    | ILMN_22938  | NM_016056.1    | 0.734512096 | 1.354611683 | 0.00113048 |
| <b>RSU1</b>      | ILMN_21628  | NM_012425.3    | 0.734466102 | 0.776631195 | 0.00791837 |
| <b>HLA-DMB</b>   | ILMN_2252   | NM_002118.3    | 0.73405362  | 1.234805982 | 0.00059628 |
| <b>C14orf142</b> | ILMN_28666  | NM_032490.3    | 0.731225916 | 1.03362714  | 0.00244109 |
| <b>BCKDK</b>     | ILMN_13829  | NM_005881.1    | 0.729788087 | 0.823487241 | 0.00620961 |
| <b>ARHGAP25</b>  | ILMN_1674   | NM_001007231.1 | 0.728785554 | 1.031541589 | 0.00812840 |
| <b>NDUFB5</b>    | ILMN_20286  | NM_002492.2    | 0.727040149 | 0.978032175 | 0.00114697 |
| <b>GEMIN6</b>    | ILMN_23187  | NM_024775.9    | 0.726343401 | 0.982878344 | 0.00246154 |
| <b>ATP6V0A1</b>  | ILMN_138088 | NM_005177.2    | 0.725439284 | 1.1407963   | 0.00647840 |
| <b>GLT25D1</b>   | ILMN_15022  | NM_024656.2    | 0.725314591 | 1.067096598 | 0.00025548 |
| <b>BCL2L2</b>    | ILMN_9171   | NM_004050.2    | 0.724745898 | 1.030677194 | 0.00170958 |
| <b>YIPF6</b>     | ILMN_8545   | NM_173834.2    | 0.724660912 | 1.28290882  | 0.00004430 |
| <b>WDR71</b>     | ILMN_13656  | NM_025155.1    | 0.724614947 | 1.053661809 | 0.00164536 |
| <b>GNS</b>       | ILMN_6937   | NM_002076.2    | 0.723930284 | 1.641619517 | 0.00011972 |
| <b>P2RX7</b>     | ILMN_26570  | NM_002562.4    | 0.718844427 | 0.869779162 | 0.00359117 |
| <b>C2orf18</b>   | ILMN_138677 | NM_017877.2    | 0.716007244 | 0.736293165 | 0.00574343 |
| <b>TTL</b>       | ILMN_14027  | NM_153712.3    | 0.715465204 | 1.444770368 | 0.00007258 |
| <b>FRAT1</b>     | ILMN_29787  | NM_181355.1    | 0.714693512 | 0.885429679 | 0.00187052 |
| <b>HTLF</b>      | ILMN_10159  | NM_002158.2    | 0.711836675 | 0.847706272 | 0.00958303 |
| <b>MT</b>        | ILMN_5185   | NM_173467.3    | 0.71124282  | 1.539123007 | 0.00000114 |
| <b>SELL</b>      | ILMN_6951   | NM_000655.2    | 0.709452209 | 0.745836628 | 0.00525236 |

|                         |             |             |             |             |            |
|-------------------------|-------------|-------------|-------------|-------------|------------|
| <b><i>OSTF1</i></b>     | ILMN_30131  | NM_012383.3 | 0.707754417 | 2.255587056 | 0.00000318 |
| <b><i>NARS</i></b>      | ILMN_6062   | NM_004539.2 | 0.706148703 | 0.738215334 | 0.00558703 |
| <b><i>PIGM</i></b>      | ILMN_19117  | NM_145167.1 | 0.705962924 | 0.835125048 | 0.00054362 |
| <b><i>PANK2</i></b>     | ILMN_137507 | NM_153640.1 | 0.705179063 | 1.272416067 | 0.00005978 |
| <b><i>NOD9</i></b>      | ILMN_16473  | NM_024618.2 | 0.705010782 | 0.955293557 | 0.00679340 |
| <b><i>SLC36A1</i></b>   | ILMN_22384  | NM_078483.2 | 0.701269954 | 1.12297335  | 0.00552217 |
| <b><i>LYSMD2</i></b>    | ILMN_19682  | NM_153374.1 | 0.699845822 | 1.003581606 | 0.00039068 |
| <b><i>NUP37</i></b>     | ILMN_4147   | NM_024057.2 | 0.69729722  | 1.115484685 | 0.00107876 |
| <b><i>WDFY2</i></b>     | ILMN_14243  | NM_052950.2 | 0.696920753 | 1.270865789 | 0.00000365 |
| <b><i>MAT2B</i></b>     | ILMN_18923  | NM_013283.3 | 0.694070182 | 0.921791826 | 0.00150174 |
| <b><i>GSR</i></b>       | ILMN_14467  | NM_000637.2 | 0.693682753 | 1.446611933 | 0.00002356 |
| <b><i>ING1</i></b>      | ILMN_2492   | NM_198219.1 | 0.691970285 | 1.062073688 | 0.00034920 |
| <b><i>UBE2L6</i></b>    | ILMN_7531   | NM_004223.3 | 0.690995994 | 1.221401827 | 0.00442322 |
| <b><i>DUSP22</i></b>    | ILMN_15436  | NM_020185.3 | 0.689864834 | 1.207246339 | 0.00007646 |
| <b><i>DERA</i></b>      | ILMN_16833  | NM_015954.1 | 0.688508854 | 0.82267023  | 0.00331905 |
| <b><i>FLJ39370</i></b>  | ILMN_18245  | NM_152400.1 | 0.68769568  | 0.751426804 | 0.00347573 |
| <b><i>CNDP2</i></b>     | ILMN_4139   | NM_018235.1 | 0.687168603 | 1.093880054 | 0.00422201 |
| <b><i>DNTTIP1</i></b>   | ILMN_17783  | NM_052951.2 | 0.683667693 | 0.854101583 | 0.00079144 |
| <b><i>PSMB9</i></b>     | ILMN_12611  | NM_002800.4 | 0.67953923  | 0.73246271  | 0.00985021 |
| <b><i>FAM96A</i></b>    | ILMN_13416  | NM_032231.4 | 0.675960026 | 1.07088344  | 0.00104755 |
| <b><i>COP57A</i></b>    | ILMN_13902  | NM_016319.1 | 0.675795633 | 1.141314182 | 0.00345432 |
| <b><i>COMT</i></b>      | ILMN_2463   | NM_000754.2 | 0.675541976 | 0.859080355 | 0.00648443 |
| <b><i>SPAST</i></b>     | ILMN_15461  | NM_199436.1 | 0.67529387  | 0.997006821 | 0.00142484 |
| <b><i>RNF34</i></b>     | ILMN_16571  | NM_025126.2 | 0.673203274 | 0.704105246 | 0.00841035 |
| <b><i>YIPF1</i></b>     | ILMN_19321  | NM_018982.3 | 0.670580284 | 2.072819422 | 0.00000023 |
| <b><i>NEDD8</i></b>     | ILMN_21274  | NM_006156.1 | 0.669855809 | 0.674729549 | 0.00308767 |
| <b><i>MINA</i></b>      | ILMN_18661  | NM_153182.1 | 0.668899752 | 1.787534969 | 0.00001651 |
| <b><i>MGC40405</i></b>  | ILMN_1247   | NM_152789.1 | 0.66835355  | 0.65432264  | 0.00533856 |
| <b><i>STX12</i></b>     | ILMN_18776  | NM_177424.1 | 0.667206523 | 0.672081087 | 0.00821280 |
| <b><i>VPS41</i></b>     | ILMN_2386   | NM_014396.2 | 0.665669394 | 1.039923735 | 0.00131977 |
| <b><i>C14orf133</i></b> | ILMN_19051  | NM_022067.2 | 0.66448481  | 1.064551011 | 0.00005755 |

|                  |             |                |             |             |            |
|------------------|-------------|----------------|-------------|-------------|------------|
| <b>ALDH3A2</b>   | ILMN_15293  | NM_001031806.1 | 0.663494351 | 1.225806952 | 0.00114718 |
| <b>PHKB</b>      | ILMN_18544  | NM_001031835.1 | 0.663202945 | 0.828357174 | 0.00199503 |
| <b>PINK1</b>     | ILMN_27027  | NM_032409.1    | 0.663117176 | 1.392356599 | 0.00017973 |
| <b>FLJ33814</b>  | ILMN_21814  | NM_173510.1    | 0.662289635 | 0.786509978 | 0.00310654 |
| <b>PCCA</b>      | ILMN_6045   | NM_000282.2    | 0.662170417 | 0.875641136 | 0.00671001 |
| <b>PYCR2</b>     | ILMN_18209  | NM_013328.2    | 0.662158353 | 0.778688542 | 0.00586486 |
| <b>CPSF2</b>     | ILMN_12041  | NM_017437.1    | 0.661956716 | 0.678957119 | 0.00474164 |
| <b>UBE2E2</b>    | ILMN_29196  | NM_152653.1    | 0.6614415   | 1.189101101 | 0.00016503 |
| <b>TAF12</b>     | ILMN_3797   | NM_005644.2    | 0.661208219 | 1.538640535 | 0.00001332 |
| <b>SLC25A1</b>   | ILMN_28181  | NM_005984.1    | 0.659489816 | 0.636752915 | 0.00404682 |
| <b>SEC11L1</b>   | ILMN_12976  | NM_014300.2    | 0.65876876  | 1.279650634 | 0.00001105 |
| <b>DNAJB6</b>    | ILMN_7651   | NM_058246.3    | 0.655667179 | 1.054957112 | 0.00048058 |
| <b>KLHL8</b>     | ILMN_19798  | NM_020803.3    | 0.654892324 | 0.9023516   | 0.00179519 |
| <b>ACO1</b>      | ILMN_9544   | NM_002197.1    | 0.653596004 | 1.252199889 | 0.00025310 |
| <b>GTF2H3</b>    | ILMN_9713   | NM_001516.3    | 0.652562825 | 0.762186527 | 0.00523155 |
| <b>LSM10</b>     | ILMN_14450  | NM_032881.1    | 0.652247983 | 0.934453562 | 0.00090340 |
| <b>NAG8</b>      | ILMN_21136  | NM_014411.2    | 0.651659684 | 0.654467349 | 0.00549902 |
| <b>ATP5F1</b>    | ILMN_138139 | NM_001688.3    | 0.650324011 | 1.6471075   | 0.00000221 |
| <b>NSF</b>       | ILMN_23282  | NM_006178.1    | 0.649787429 | 0.966754147 | 0.00150748 |
| <b>C14orf129</b> | ILMN_7725   | NM_016472.3    | 0.649488365 | 0.845576993 | 0.00222523 |
| <b>C7orf11</b>   | ILMN_20229  | NM_138701.1    | 0.648424024 | 1.030461324 | 0.00188419 |
| <b>RAB4A</b>     | ILMN_14453  | NM_004578.2    | 0.645974184 | 1.119336929 | 0.00016381 |
| <b>PAPSS1</b>    | ILMN_6621   | NM_005443.4    | 0.644433151 | 1.089439803 | 0.00684807 |
| <b>RAB8A</b>     | ILMN_8881   | NM_005370.4    | 0.643908926 | 2.486726255 | 0.00000007 |
| <b>SFT2D1</b>    | ILMN_5727   | NM_145169.1    | 0.643517185 | 1.381139093 | 0.00017387 |
| <b>C5orf15</b>   | ILMN_23157  | NM_020199.1    | 0.641504014 | 1.369919922 | 0.00000815 |
| <b>STIP1</b>     | ILMN_28761  | NM_006819.1    | 0.639747132 | 0.914075119 | 0.00037943 |
| <b>TRIM22</b>    | ILMN_532    | NM_006074.2    | 0.639603182 | 1.16001109  | 0.00076658 |
| <b>CD84</b>      | ILMN_16790  | NM_003874.1    | 0.637727242 | 0.674191429 | 0.00524555 |
| <b>CCT7</b>      | ILMN_22959  | NM_006429.2    | 0.630546718 | 1.001568609 | 0.00117525 |
| <b>TXNDC</b>     | ILMN_13849  | NM_030755.3    | 0.629887162 | 0.839765388 | 0.00214526 |

|                 |             |                |             |             |            |
|-----------------|-------------|----------------|-------------|-------------|------------|
| <b>GALM</b>     | ILMN_10698  | NM_138801.1    | 0.629606832 | 1.079055934 | 0.00020824 |
| <b>AP3B1</b>    | ILMN_4527   | NM_003664.3    | 0.628411492 | 0.774722262 | 0.00530390 |
| <b>YBX1</b>     | ILMN_2951   | NM_004559.2    | 0.626746918 | 0.799211438 | 0.00576257 |
| <b>CPOX</b>     | ILMN_28523  | NM_000097.4    | 0.62547916  | 0.888055102 | 0.00258340 |
| <b>SNTB1</b>    | ILMN_23979  | NM_021021.2    | 0.625010436 | 0.894065332 | 0.00935770 |
| <b>VPS72</b>    | ILMN_17901  | NM_005997.1    | 0.62278748  | 1.26711063  | 0.00030014 |
| <b>ATP6V0D1</b> | ILMN_139373 | NM_004691.3    | 0.62147397  | 0.730172626 | 0.00229783 |
| <b>SUMF2</b>    | ILMN_9757   | NM_015411.1    | 0.617287604 | 0.874405945 | 0.00843465 |
| <b>MR1</b>      | ILMN_10108  | NM_001531.1    | 0.615780365 | 0.968113548 | 0.00993067 |
| <b>TRAFD1</b>   | ILMN_21539  | NM_006700.1    | 0.613875843 | 0.571258077 | 0.00960467 |
| <b>HK1</b>      | ILMN_23877  | NM_033500.1    | 0.612449234 | 1.011322954 | 0.00092195 |
| <b>P4HA1</b>    | ILMN_8003   | NM_000917.2    | 0.611236652 | 0.72707231  | 0.00625872 |
| <b>FLJ14466</b> | ILMN_29870  | NM_032790.2    | 0.61089811  | 0.830612766 | 0.00172031 |
| <b>PSMD4</b>    | ILMN_137384 | NM_002810.1    | 0.610740993 | 0.757697935 | 0.00101724 |
| <b>C10orf61</b> | ILMN_24822  | NM_001013840.1 | 0.610458973 | 1.081393619 | 0.00013008 |
| <b>FKBP4</b>    | ILMN_9429   | NM_002014.2    | 0.609790605 | 0.822235317 | 0.00292538 |
| <b>CDK2AP1</b>  | ILMN_19522  | NM_004642.2    | 0.608899789 | 0.746051772 | 0.00607617 |
| <b>PBX3</b>     | ILMN_23493  | NM_006195.4    | 0.608542479 | 1.042523333 | 0.00033834 |
| <b>CCNC</b>     | ILMN_11667  | NM_005190.3    | 0.60615937  | 0.773035605 | 0.00270549 |
| <b>PRCP</b>     | ILMN_2019   | NM_199418.1    | 0.605288708 | 1.075108698 | 0.00129425 |
| <b>GBE1</b>     | ILMN_2925   | NM_000158.1    | 0.605174564 | 1.414871406 | 0.00066951 |
| <b>LRCH3</b>    | ILMN_14018  | NM_032773.2    | 0.603643585 | 0.813171638 | 0.00619821 |
| <b>POLR2E</b>   | ILMN_21511  | NM_002695.2    | 0.603012311 | 0.990775486 | 0.00027094 |
| <b>PGM2</b>     | ILMN_6226   | NM_018290.2    | 0.601475444 | 0.722208068 | 0.00527047 |
| <b>NCOA4</b>    | ILMN_24328  | NM_005437.1    | 0.600193396 | 1.108888989 | 0.00054757 |
| <b>CD37</b>     | ILMN_20101  | NM_001774.1    | 0.600048449 | 0.728222604 | 0.00438458 |
| <b>GGPS1</b>    | ILMN_137664 | NM_004837.2    | 0.599117516 | 0.84254707  | 0.00184079 |
| <b>CCT6A</b>    | ILMN_3686   | NM_001009186.1 | 0.598843562 | 0.840343858 | 0.00148873 |
| <b>HP1BP3</b>   | ILMN_29502  | NM_016287.2    | 0.598707576 | 0.947341533 | 0.00169712 |
| <b>TRA16</b>    | ILMN_20587  | NM_176880.4    | 0.598636525 | 0.823603103 | 0.00530158 |
| <b>ETFA</b>     | ILMN_138729 | NM_000126.1    | 0.597849505 | 1.12408418  | 0.00015177 |

|           |            |                |             |             |            |
|-----------|------------|----------------|-------------|-------------|------------|
| VAMP5     | ILMN_20179 | NM_006634.2    | 0.597238144 | 0.71886071  | 0.00463721 |
| TSEN34    | ILMN_5948  | NM_024075.1    | 0.597201061 | 1.116530396 | 0.00036174 |
| C9orf23   | ILMN_3926  | NM_148178.1    | 0.595942735 | 0.846713274 | 0.00534341 |
| ACAT1     | ILMN_29522 | NM_000019.2    | 0.594932008 | 0.719532236 | 0.00305532 |
| MRPL48    | ILMN_24933 | NM_016055.4    | 0.594853628 | 1.268606525 | 0.00031550 |
| GOSR2     | ILMN_4229  | NM_054022.2    | 0.593957326 | 1.346384331 | 0.00004694 |
| PSME2     | ILMN_19572 | NM_002818.2    | 0.591841903 | 1.139840032 | 0.00020595 |
| TMEM77    | ILMN_30117 | NM_178454.2    | 0.591390405 | 0.901345416 | 0.00467419 |
| PSMC6     | ILMN_3800  | NM_002806.2    | 0.584372895 | 0.861482699 | 0.00052608 |
| CBX1      | ILMN_6262  | NM_006807.3    | 0.575442923 | 1.182977034 | 0.00251133 |
| FLJ13614  | ILMN_12182 | NM_139076.1    | 0.575017217 | 0.696881716 | 0.00797877 |
| C9orf19   | ILMN_12810 | NM_022343.2    | 0.574894314 | 1.050523704 | 0.00532794 |
| CDA08     | ILMN_10328 | NM_030790.2    | 0.574488481 | 0.835644003 | 0.00224865 |
| LOC84661  | ILMN_18534 | NM_032574.2    | 0.569701867 | 0.981231913 | 0.00016403 |
| BCCIP     | ILMN_26223 | NM_016567.2    | 0.569086006 | 0.844403344 | 0.00325171 |
| NFYC      | ILMN_5936  | NM_014223.2    | 0.568640405 | 0.868762425 | 0.00404212 |
| MRE11A    | ILMN_6718  | NM_005590.3    | 0.568494718 | 1.529673741 | 0.00001696 |
| OSBPL1A   | ILMN_662   | NM_018030.3    | 0.568215143 | 0.926351958 | 0.00047778 |
| LOC340061 | ILMN_18797 | NM_198282.1    | 0.567618043 | 0.689243491 | 0.00474147 |
| BCKDHA    | ILMN_13270 | NM_000709.2    | 0.566591781 | 1.179166285 | 0.00005504 |
| VBP1      | ILMN_9083  | NM_003372.4    | 0.565843822 | 1.066690264 | 0.00041695 |
| TERF2     | ILMN_21134 | NM_005652.2    | 0.564508109 | 0.831878711 | 0.00245700 |
| C2orf7    | ILMN_24250 | NM_032319.1    | 0.563716251 | 1.367309251 | 0.00042654 |
| CEP63     | ILMN_1690  | NM_025180.2    | 0.558482462 | 0.742866444 | 0.00729568 |
| OACT5     | ILMN_22717 | NM_005768.5    | 0.557772544 | 1.167585684 | 0.00017228 |
| ARF3      | ILMN_6605  | NM_001659.1    | 0.556975803 | 0.902342007 | 0.00136220 |
| SLC38A6   | ILMN_7226  | NM_153811.1    | 0.556810899 | 0.810893343 | 0.00283712 |
| PFN1      | ILMN_2354  | NM_005022.2    | 0.556212216 | 0.840582789 | 0.00181308 |
| MANEA     | ILMN_6991  | NM_024641.2    | 0.555690029 | 0.765970605 | 0.00902237 |
| ALG8      | ILMN_24209 | NM_001007027.1 | 0.551946917 | 0.739794606 | 0.00810565 |
| TMEM14C   | ILMN_12206 | NM_016462.2    | 0.551640294 | 0.959306211 | 0.00374177 |

|                  |             |                |             |             |            |
|------------------|-------------|----------------|-------------|-------------|------------|
| <i>PXMP4</i>     | ILMN_4808   | NM_007238.3    | 0.549666885 | 0.885829412 | 0.00252578 |
| <i>ACTR10</i>    | ILMN_18205  | NM_018477.1    | 0.548316623 | 1.387712534 | 0.00001911 |
| <i>C11orf17</i>  | ILMN_9655   | NM_020642.2    | 0.547234077 | 0.980450203 | 0.00333597 |
| <i>ACTR2</i>     | ILMN_2152   | NM_001005386.1 | 0.546355357 | 0.812154576 | 0.00608161 |
| <i>RSNL2</i>     | ILMN_17216  | NM_024692.3    | 0.545946152 | 0.829756456 | 0.00805801 |
| <i>COPZ1</i>     | ILMN_4037   | NM_016057.1    | 0.545520981 | 0.799296562 | 0.00395313 |
| <i>CAPNS1</i>    | ILMN_6617   | NM_001003962.1 | 0.54537447  | 0.669326948 | 0.00573710 |
| <i>STUB1</i>     | ILMN_22822  | NM_005861.2    | 0.542125275 | 0.698526637 | 0.00491662 |
| <i>PSMB5</i>     | ILMN_29312  | NM_002797.2    | 0.541998408 | 1.055086186 | 0.00029673 |
| <i>DYM</i>       | ILMN_6843   | NM_017653.2    | 0.541041599 | 0.9654535   | 0.00428592 |
| <i>AGPS</i>      | ILMN_138634 | NM_003659.1    | 0.540726523 | 1.18173707  | 0.00074260 |
| <i>CLCN3</i>     | ILMN_15279  | NM_001829.2    | 0.540459483 | 0.692590724 | 0.00838864 |
| <i>ARL5</i>      | ILMN_137185 | NM_012097.2    | 0.539235483 | 0.946302784 | 0.00202584 |
| <i>C4orf13</i>   | ILMN_11413  | NM_001029998.1 | 0.538921014 | 1.019956729 | 0.00184603 |
| <i>CD244</i>     | ILMN_7885   | NM_016382.2    | 0.537414131 | 0.706077057 | 0.00822767 |
| <i>MRPS28</i>    | ILMN_16611  | NM_014018.2    | 0.533530893 | 0.932362259 | 0.00474327 |
| <i>SCCPDH</i>    | ILMN_30353  | NM_016002.2    | 0.53299596  | 0.874953099 | 0.00267603 |
| <i>CSNK1A1</i>   | ILMN_24977  | NM_001892.4    | 0.532411953 | 0.950426926 | 0.00968292 |
| <i>VPS29</i>     | ILMN_14188  | NM_016226.2    | 0.529279832 | 1.141988392 | 0.00123260 |
| <i>C10orf7</i>   | ILMN_11650  | NM_006023.1    | 0.529032709 | 1.472693353 | 0.00005202 |
| <i>INPP5B</i>    | ILMN_6646   | NM_005540.1    | 0.528913697 | 0.676301308 | 0.00964580 |
| <i>ZMPSTE24</i>  | ILMN_13713  | NM_005857.2    | 0.526380447 | 0.915873674 | 0.00174190 |
| <i>GALNT4</i>    | ILMN_15303  | NM_003774.3    | 0.52596861  | 0.692989685 | 0.00942236 |
| <i>GOLGA5</i>    | ILMN_20157  | NM_005113.2    | 0.52402571  | 0.855780518 | 0.00358645 |
| <i>GLE1L</i>     | ILMN_19199  | NM_001003722.1 | 0.522235331 | 0.816909203 | 0.00632145 |
| <i>OGFOD1</i>    | ILMN_16561  | NM_001031707.1 | 0.518441492 | 0.794727583 | 0.00303007 |
| <i>RBM18</i>     | ILMN_8277   | NM_033117.2    | 0.51592074  | 1.116793418 | 0.00560431 |
| <i>NS4ATP2</i>   | ILMN_18384  | NM_024632.3    | 0.515324206 | 0.691190711 | 0.00994818 |
| <i>PDCD6</i>     | ILMN_15265  | NM_013232.2    | 0.514233262 | 1.102864386 | 0.00112019 |
| <i>GABARAPL2</i> | ILMN_9805   | NM_007285.6    | 0.513667927 | 1.671080501 | 0.00019022 |
| <i>BTF3L4</i>    | ILMN_3105   | NM_152265.1    | 0.513640416 | 1.15768482  | 0.00001829 |

|                  |             |             |              |             |            |
|------------------|-------------|-------------|--------------|-------------|------------|
| <b>WIBG</b>      | ILMN_19902  | NM_032345.1 | 0.513365324  | 0.802261004 | 0.00264002 |
| <b>NFE2L1</b>    | ILMN_13955  | NM_003204.1 | 0.513152066  | 0.91593502  | 0.00041556 |
| <b>C7orf28A</b>  | ILMN_2087   | NM_015622.5 | 0.509415546  | 0.604216727 | 0.00817957 |
| <b>C15orf17</b>  | ILMN_13536  | NM_020447.2 | 0.507043484  | 1.129601563 | 0.00279722 |
| <b>TPK1</b>      | ILMN_6467   | NM_022445.2 | 0.507032195  | 0.967616723 | 0.00125616 |
| <b>RHOA</b>      | ILMN_6247   | NM_001664.2 | 0.506140959  | 0.748492876 | 0.00098190 |
| <b>WAS</b>       | ILMN_1668   | NM_000377.1 | 0.504612066  | 1.161072475 | 0.00088430 |
| <b>LOC285636</b> | ILMN_8228   | NM_175921.4 | 0.503547058  | 0.796804283 | 0.00655570 |
| <b>TMCO1</b>     | ILMN_8084   | NM_019026.2 | 0.502782404  | 0.920191132 | 0.00070381 |
| <b>TM2D1</b>     | ILMN_9063   | NM_032027.2 | 0.502048373  | 0.925561389 | 0.00162488 |
| <b>RCN1</b>      | ILMN_8159   | NM_002901.1 | 0.501933318  | 0.87855392  | 0.00039560 |
| <b>SFRS2</b>     | ILMN_26358  | NM_003016.2 | -0.501101485 | 0.751488215 | 0.00771185 |
| <b>NCLN</b>      | ILMN_29505  | NM_020170.3 | -0.50139972  | 1.156881313 | 0.00344346 |
| <b>MTMR2</b>     | ILMN_24002  | NM_201281.1 | -0.501808986 | 0.965612981 | 0.00278489 |
| <b>OSBPL7</b>    | ILMN_4611   | NM_145798.2 | -0.506236884 | 0.692412796 | 0.00713701 |
| <b>RIPK5</b>     | ILMN_1333   | NM_199462.1 | -0.506241651 | 1.10939465  | 0.00094333 |
| <b>ELK1</b>      | ILMN_14942  | NM_005229.2 | -0.506595063 | 1.06771036  | 0.00253708 |
| <b>ILKAP</b>     | ILMN_12973  | NM_030768.2 | -0.507099782 | 1.203991038 | 0.00132750 |
| <b>FBL</b>       | ILMN_14351  | NM_001436.2 | -0.508152926 | 0.93084529  | 0.00616627 |
| <b>RAFTLIN</b>   | ILMN_29470  | NM_015150.1 | -0.509860651 | 0.691386978 | 0.00867436 |
| <b>FEM1A</b>     | ILMN_2838   | NM_018708.1 | -0.51131736  | 0.952052307 | 0.00125013 |
| <b>PSCD2</b>     | ILMN_16003  | NM_017457.3 | -0.511819719 | 0.700114811 | 0.00583446 |
| <b>CCDC16</b>    | ILMN_23839  | NM_052857.2 | -0.512078285 | 1.0515164   | 0.00018637 |
| <b>RPL37</b>     | ILMN_138392 | NM_000997.3 | -0.512921504 | 1.018252708 | 0.00011698 |
| <b>WDR19</b>     | ILMN_11749  | NM_025132.3 | -0.513291141 | 0.791396744 | 0.00223438 |
| <b>ZCCHC3</b>    | ILMN_28604  | NM_033089.6 | -0.51345165  | 1.029007424 | 0.00137729 |
| <b>COG1</b>      | ILMN_137022 | NM_018714.1 | -0.513593241 | 0.857290291 | 0.00279936 |
| <b>MXD4</b>      | ILMN_26701  | NM_006454.2 | -0.513605477 | 0.955769313 | 0.00302540 |
| <b>WBP1</b>      | ILMN_20957  | NM_012477.2 | -0.514893469 | 0.923870702 | 0.00079940 |
| <b>LIMD2</b>     | ILMN_25849  | NM_030576.2 | -0.515598945 | 0.917797589 | 0.00442454 |
| <b>ZFYVE20</b>   | ILMN_15619  | NM_022340.2 | -0.517706349 | 1.009276209 | 0.00012700 |



|                  |             |                |              |             |            |
|------------------|-------------|----------------|--------------|-------------|------------|
| <i>MRPL2</i>     | ILMN_4811   | NM_015950.3    | -0.518147351 | 1.087524189 | 0.00269727 |
| <i>EDG4</i>      | ILMN_4660   | NM_004720.4    | -0.518490806 | 0.84209368  | 0.00080746 |
| <i>RINT-1</i>    | ILMN_23747  | NM_021930.3    | -0.51926901  | 0.819352789 | 0.00654352 |
| <i>COX6C</i>     | ILMN_6419   | NM_004374.2    | -0.519912949 | 0.799991141 | 0.00073464 |
| <i>2'-PDE</i>    | ILMN_16583  | NM_177966.4    | -0.521811264 | 1.020236026 | 0.00115644 |
| <i>SIAHBP1</i>   | ILMN_14897  | NM_014281.3    | -0.521985439 | 1.165205236 | 0.00404616 |
| <i>FLJ13149</i>  | ILMN_10466  | NM_021826.4    | -0.522670012 | 0.899495902 | 0.00365177 |
| <i>RPA3</i>      | ILMN_29134  | NM_002947.3    | -0.523175111 | 0.784664531 | 0.00127759 |
| <i>FLJ20186</i>  | ILMN_2786   | NM_017702.2    | -0.525049178 | 0.640859744 | 0.00639750 |
| <i>C14orf156</i> | ILMN_6302   | NM_031210.3    | -0.525876549 | 0.695348323 | 0.00156890 |
| <i>YARS</i>      | ILMN_13503  | NM_003680.2    | -0.526900543 | 0.781042911 | 0.00307002 |
| <i>C10orf28</i>  | ILMN_989    | NM_014472.3    | -0.528865117 | 0.666665125 | 0.00893320 |
| <i>GNL3</i>      | ILMN_18645  | NM_014366.4    | -0.529243563 | 1.027555574 | 0.00638245 |
| <i>CIRH1A</i>    | ILMN_2574   | NM_032830.1    | -0.52990755  | 1.010140713 | 0.00537304 |
| <i>C14orf43</i>  | ILMN_22813  | NM_194278.2    | -0.530803886 | 0.832143247 | 0.00164632 |
| <i>PRPS1</i>     | ILMN_6887   | NM_002764.2    | -0.531046429 | 1.110198744 | 0.00014613 |
| <i>PUSL1</i>     | ILMN_8805   | NM_153339.1    | -0.53137201  | 0.983409622 | 0.00171481 |
| <i>PARP6</i>     | ILMN_5118   | NM_020213.1    | -0.532217352 | 1.786552893 | 0.00004720 |
| <i>NIFUN</i>     | ILMN_1909   | NM_014301.2    | -0.532831492 | 0.855300668 | 0.00545087 |
| <i>EDEM1</i>     | ILMN_9408   | NM_014674.1    | -0.534159313 | 0.899573452 | 0.00834955 |
| <i>RPL23A</i>    | ILMN_137509 | NM_000984.4    | -0.534879307 | 1.085682379 | 0.00146829 |
| <i>CCNB1IP1</i>  | ILMN_16420  | NM_021178.2    | -0.534921378 | 1.211904411 | 0.00007463 |
| <i>BMS1L</i>     | ILMN_4307   | NM_014753.2    | -0.535113173 | 0.735214469 | 0.00860805 |
| <i>MRPS24</i>    | ILMN_17184  | NM_032014.1    | -0.535266097 | 0.647342605 | 0.00313202 |
| <i>ZCCHC11</i>   | ILMN_4936   | NM_001009881.1 | -0.53789923  | 0.680978374 | 0.00392385 |
| <i>GLCCI1</i>    | ILMN_22544  | NM_138426.1    | -0.538041773 | 0.782651606 | 0.00866811 |
| <i>ZNF211</i>    | ILMN_8413   | NM_006385.2    | -0.538417821 | 0.939940258 | 0.00064505 |
| <i>TIMM22</i>    | ILMN_29380  | NM_013337.2    | -0.541037298 | 0.849931579 | 0.00247792 |
| <i>SLC41A3</i>   | ILMN_19829  | NM_001008485.1 | -0.541342697 | 0.866825731 | 0.00238013 |
| <i>SSSCA1</i>    | ILMN_7443   | NM_006396.1    | -0.542120495 | 0.791636209 | 0.00711843 |
| <i>NUP205</i>    | ILMN_11753  | NM_015135.1    | -0.542554722 | 0.903764833 | 0.00077945 |

|                  |            |                |              |             |            |
|------------------|------------|----------------|--------------|-------------|------------|
| <i>IFT122</i>    | ILMN_21045 | NM_018262.2    | -0.54286388  | 1.090504474 | 0.00207521 |
| <i>LOC113444</i> | ILMN_15613 | NM_138428.2    | -0.544285305 | 0.982416486 | 0.00067315 |
| <i>DNAJB6</i>    | ILMN_26714 | NM_005494.2    | -0.545564895 | 0.793932289 | 0.00764188 |
| <i>SLC25A17</i>  | ILMN_21822 | NM_006358.2    | -0.545698652 | 0.777571931 | 0.00476313 |
| <i>ZNF350</i>    | ILMN_20125 | NM_021632.3    | -0.550047933 | 0.783806276 | 0.00107854 |
| <i>RRAS2</i>     | ILMN_30083 | NM_012250.3    | -0.550217999 | 0.683428196 | 0.00715362 |
| <i>ARHGAP4</i>   | ILMN_2811  | NM_001666.2    | -0.551004947 | 0.785065836 | 0.00558225 |
| <i>PHLPPL</i>    | ILMN_10066 | NM_015020.2    | -0.553043887 | 0.955468838 | 0.00637876 |
| <i>NOL8</i>      | ILMN_25734 | NM_017948.4    | -0.553410288 | 0.6366454   | 0.00843367 |
| <i>CHD6</i>      | ILMN_28663 | NM_032221.3    | -0.553971876 | 1.023392347 | 0.00198387 |
| <i>CERK</i>      | ILMN_2275  | NM_182661.1    | -0.555520585 | 0.893010898 | 0.00316698 |
| <i>NEIL2</i>     | ILMN_11540 | NM_145043.1    | -0.555531793 | 0.732799123 | 0.00484798 |
| <i>ASCC3</i>     | ILMN_5802  | NM_022091.3    | -0.555810381 | 1.059056206 | 0.00552599 |
| <i>HECA</i>      | ILMN_3008  | NM_016217.2    | -0.556347682 | 0.858807643 | 0.00114314 |
| <i>TNRC6B</i>    | ILMN_901   | NM_001024843.1 | -0.556756071 | 0.808217912 | 0.00212181 |
| <i>ATP5I</i>     | ILMN_14284 | NM_007100.2    | -0.558678699 | 0.581710782 | 0.00508938 |
| <i>NIP7</i>      | ILMN_28300 | NM_016101.3    | -0.559420708 | 0.931442207 | 0.00178296 |
| <i>SSR4</i>      | ILMN_3302  | NM_006280.1    | -0.560086611 | 0.812498017 | 0.00075741 |
| <i>KCTD9</i>     | ILMN_1204  | NM_017634.2    | -0.56103139  | 0.901177541 | 0.00096362 |
| <i>C8orf38</i>   | ILMN_13088 | NM_152416.1    | -0.561399528 | 0.986388729 | 0.00117088 |
| <i>UBN1</i>      | ILMN_15680 | NM_016936.2    | -0.561640796 | 1.047767493 | 0.00032824 |
| <i>LOC91689</i>  | ILMN_9476  | NM_033318.3    | -0.562517452 | 1.023424687 | 0.00103510 |
| <i>C9orf156</i>  | ILMN_12842 | NM_016481.2    | -0.563566234 | 0.721816847 | 0.00861659 |
| <i>HPS1</i>      | ILMN_2724  | NM_182639.1    | -0.564267898 | 0.809408141 | 0.00092401 |
| <i>POLR2I</i>    | ILMN_17223 | NM_006233.4    | -0.564447269 | 0.610663494 | 0.00922027 |
| <i>IMMP2L</i>    | ILMN_30049 | NM_032549.1    | -0.564730086 | 0.802043738 | 0.00460118 |
| <i>LOC168850</i> | ILMN_24570 | NM_176814.3    | -0.56555576  | 0.788592126 | 0.00749700 |
| <i>DDA1</i>      | ILMN_29105 | NM_024050.4    | -0.565916143 | 0.900027059 | 0.00038974 |
| <i>MED9</i>      | ILMN_19228 | NM_018019.2    | -0.569409453 | 0.708003815 | 0.00188291 |
| <i>WDR75</i>     | ILMN_14393 | NM_032168.1    | -0.5700052   | 0.7651042   | 0.00359337 |
| <i>MRPL11</i>    | ILMN_1149  | NM_016050.2    | -0.570694775 | 0.865336827 | 0.00253789 |

|                  |            |             |              |             |            |
|------------------|------------|-------------|--------------|-------------|------------|
| <i>LRP5L</i>     | ILMN_650   | NM_182492.1 | -0.571430915 | 0.921914449 | 0.00039107 |
| <i>PIK4CB</i>    | ILMN_21393 | NM_002651.1 | -0.571689076 | 0.741826102 | 0.00464515 |
| <i>KRT10</i>     | ILMN_1890  | NM_000421.2 | -0.572172093 | 0.728055479 | 0.00436014 |
| <i>ZNF263</i>    | ILMN_13327 | NM_005741.3 | -0.575435129 | 0.969416741 | 0.00028422 |
| <i>BCL2</i>      | ILMN_3868  | NM_000633.2 | -0.575548572 | 0.844473447 | 0.00325378 |
| <i>PIGT</i>      | ILMN_19969 | NM_015937.2 | -0.576433969 | 1.161501121 | 0.00048774 |
| <i>INOC1</i>     | ILMN_5093  | NM_032196.3 | -0.576917795 | 0.755514595 | 0.00583012 |
| <i>SFRS12</i>    | ILMN_8967  | NM_139168.1 | -0.580161358 | 0.658939464 | 0.00926378 |
| <i>IXL</i>       | ILMN_10710 | NM_017592.1 | -0.580304926 | 0.950420241 | 0.00014253 |
| <i>C14orf138</i> | ILMN_29130 | NM_024558.1 | -0.582713642 | 0.960895284 | 0.00335093 |
| <i>SFRS8</i>     | ILMN_9797  | NM_004592.2 | -0.585074071 | 1.347585696 | 0.00022540 |
| <i>SYNCRIP</i>   | ILMN_28470 | NM_006372.3 | -0.585172097 | 1.087116066 | 0.00311096 |
| <i>RPS19BP1</i>  | ILMN_8107  | NM_194326.2 | -0.585338721 | 0.845933847 | 0.00365128 |
| <i>MAP4K5</i>    | ILMN_10246 | NM_006575.3 | -0.58540163  | 0.829097844 | 0.00757634 |
| <i>SUV420H1</i>  | ILMN_29861 | NM_016028.4 | -0.58748649  | 1.378314577 | 0.00035114 |
| <i>C1orf35</i>   | ILMN_28904 | NM_024319.2 | -0.587897505 | 0.957215804 | 0.00130979 |
| <i>ZBTB20</i>    | ILMN_27339 | NM_015642.2 | -0.588916852 | 0.772194348 | 0.00270763 |
| <i>GATS</i>      | ILMN_18755 | NM_178831.4 | -0.589908263 | 0.711683709 | 0.00449993 |
| <i>PMPCA</i>     | ILMN_21420 | NM_015160.1 | -0.590865296 | 1.347090479 | 0.00013962 |
| <i>DDX27</i>     | ILMN_20732 | NM_017895.6 | -0.590934524 | 0.712906638 | 0.00573165 |
| <i>KPNA4</i>     | ILMN_21107 | NM_002268.3 | -0.591097414 | 0.764231033 | 0.00709542 |
| <i>LRIG2</i>     | ILMN_7215  | NM_014813.1 | -0.591763549 | 1.000300389 | 0.00098919 |
| <i>ADNP</i>      | ILMN_19803 | NM_181442.1 | -0.593035819 | 1.062015792 | 0.00007631 |
| <i>ZDHHC5</i>    | ILMN_28354 | NM_015457.2 | -0.594136352 | 0.973921694 | 0.00091996 |
| <i>BAP1</i>      | ILMN_17024 | NM_004656.2 | -0.594422282 | 1.015586606 | 0.00133679 |
| <i>TATDN2</i>    | ILMN_8206  | NM_014760.2 | -0.594767207 | 1.201800357 | 0.00004238 |
| <i>AZIN1</i>     | ILMN_4825  | NM_015878.4 | -0.595459472 | 0.919861629 | 0.00489867 |
| <i>RPS6KB1</i>   | ILMN_1872  | NM_003161.2 | -0.595631327 | 1.004764715 | 0.00628176 |
| <i>AZI1</i>      | ILMN_3856  | NM_014984.1 | -0.596227296 | 1.182177661 | 0.00048784 |
| <i>LRRC8A</i>    | ILMN_18635 | NM_019594.2 | -0.596405887 | 0.885748941 | 0.00277366 |
| <i>RBM13</i>     | ILMN_18111 | NM_032509.2 | -0.596437358 | 0.973597748 | 0.00014306 |

|                      |             |             |              |             |            |
|----------------------|-------------|-------------|--------------|-------------|------------|
| <i>ZNF26</i>         | ILMN_3233   | NM_019591.2 | -0.59830862  | 0.853992606 | 0.00339823 |
| <i>KDELC2</i>        | ILMN_23677  | NM_153705.2 | -0.600616412 | 1.052805945 | 0.00022644 |
| <i>KIAA1530</i>      | ILMN_958    | NM_020894.1 | -0.602437968 | 1.261110975 | 0.00010936 |
| <i>FAU</i>           | ILMN_3073   | NM_001997.3 | -0.602457622 | 1.036010219 | 0.00001407 |
| <i>C8orf33</i>       | ILMN_15901  | NM_023080.1 | -0.603252646 | 1.414514982 | 0.00026532 |
| <i>SEMA4D</i>        | ILMN_24615  | NM_006378.2 | -0.603394443 | 0.861269484 | 0.00139078 |
| <i>DKFZp761I2123</i> | ILMN_4684   | NM_031449.3 | -0.604000476 | 0.903562568 | 0.00721373 |
| <i>KIAA1542</i>      | ILMN_22314  | NM_020901.1 | -0.604016318 | 0.830834961 | 0.00079312 |
| <i>NARF</i>          | ILMN_138328 | NM_031968.1 | -0.60417202  | 0.883103921 | 0.00757037 |
| <i>CRAMP1L</i>       | ILMN_12672  | NM_020825.2 | -0.604341887 | 1.164221816 | 0.00019481 |
| <i>RASA2</i>         | ILMN_15489  | NM_006506.2 | -0.605237893 | 0.88103833  | 0.00727633 |
| <i>IL12A</i>         | ILMN_28240  | NM_000882.2 | -0.605767267 | 0.706673327 | 0.00764865 |
| <i>RNPEPL1</i>       | ILMN_18851  | NM_018226.3 | -0.605977149 | 0.907204305 | 0.00144612 |
| <i>C3orf19</i>       | ILMN_13337  | NM_016474.3 | -0.606982737 | 0.935698555 | 0.00150798 |
| <i>TSSC4</i>         | ILMN_17177  | NM_005706.2 | -0.607164855 | 1.028524623 | 0.00063006 |
| <i>DOCK10</i>        | ILMN_15188  | NM_014689.1 | -0.610185033 | 0.927657427 | 0.00070649 |
| <i>QRICH1</i>        | ILMN_22436  | NM_017730.2 | -0.611913915 | 1.527494986 | 0.00015097 |
| <i>ZNF622</i>        | ILMN_1143   | NM_033414.2 | -0.613218062 | 1.414248597 | 0.00002261 |
| <i>ZNF416</i>        | ILMN_13535  | NM_017879.1 | -0.613628233 | 0.700755649 | 0.00915879 |
| <i>PDRG1</i>         | ILMN_20546  | NM_030815.2 | -0.614441842 | 1.064193414 | 0.00435025 |
| <i>C20orf3</i>       | ILMN_2205   | NM_020531.2 | -0.614571123 | 0.768684462 | 0.00967519 |
| <i>ZNF529</i>        | ILMN_24517  | NM_020951.1 | -0.614692228 | 0.785446095 | 0.00106414 |
| <i>TP53I13</i>       | ILMN_23391  | NM_138349.2 | -0.616381148 | 0.729544257 | 0.00769178 |
| <i>MBTPS1</i>        | ILMN_5443   | NM_201268.1 | -0.617123097 | 0.888166037 | 0.00240723 |
| <i>TROVE2</i>        | ILMN_4319   | NM_004600.3 | -0.617753128 | 0.673186701 | 0.00774056 |
| <i>TUBGCP5</i>       | ILMN_25939  | NM_052903.2 | -0.617898874 | 0.889360861 | 0.00042017 |
| <i>MRPL55</i>        | ILMN_467    | NM_181464.1 | -0.618983592 | 0.811107318 | 0.00119417 |
| <i>CUL2</i>          | ILMN_26940  | NM_003591.2 | -0.61974505  | 1.127957039 | 0.00054435 |
| <i>ZNF76</i>         | ILMN_6486   | NM_003427.3 | -0.620226015 | 1.171212418 | 0.00092501 |
| <i>C4orf9</i>        | ILMN_10925  | NM_003703.1 | -0.620535032 | 1.215629606 | 0.00038208 |
| <i>KIAA1958</i>      | ILMN_17353  | NM_133465.1 | -0.621349152 | 0.972702081 | 0.00872690 |

|                  |            |                |              |             |            |
|------------------|------------|----------------|--------------|-------------|------------|
| <i>TAF1C</i>     | ILMN_4122  | NM_139353.1    | -0.622990892 | 1.445562625 | 0.00002040 |
| <i>IDS</i>       | ILMN_2023  | NM_000202.2    | -0.62329983  | 0.900843185 | 0.00072718 |
| <i>PRAF1</i>     | ILMN_2978  | NM_022490.1    | -0.623820785 | 1.032997273 | 0.00096113 |
| <i>C20orf29</i>  | ILMN_7561  | NM_018347.1    | -0.624761404 | 1.125534915 | 0.00062872 |
| <i>GATAD2A</i>   | ILMN_1801  | NM_017660.2    | -0.625589049 | 1.147481763 | 0.00011571 |
| <i>ACACB</i>     | ILMN_3318  | NM_001093.2    | -0.626024408 | 1.038757802 | 0.00759206 |
| <i>ARHGDI1</i>   | ILMN_15874 | NM_004309.3    | -0.628056706 | 0.95971498  | 0.00078607 |
| <i>RBKS</i>      | ILMN_21205 | NM_022128.1    | -0.629280777 | 1.243196703 | 0.00029184 |
| <i>GMEB1</i>     | ILMN_14071 | NM_006582.2    | -0.630458154 | 1.010146742 | 0.00544840 |
| <i>KIAA0179</i>  | ILMN_14288 | NM_015056.1    | -0.631285034 | 0.926908086 | 0.00071174 |
| <i>C17orf48</i>  | ILMN_6506  | NM_020233.3    | -0.631507612 | 1.435374244 | 0.00003101 |
| <i>HNRPL</i>     | ILMN_5928  | NM_001533.2    | -0.631636976 | 0.705438767 | 0.00325831 |
| <i>PTPN1</i>     | ILMN_5417  | NM_002827.2    | -0.633813993 | 0.776627472 | 0.00670939 |
| <i>IRF2BP1</i>   | ILMN_6522  | NM_015649.1    | -0.635292951 | 0.890038121 | 0.00457907 |
| <i>WBSCR22</i>   | ILMN_26330 | NM_017528.2    | -0.636188587 | 0.878022756 | 0.00081436 |
| <i>LOC91431</i>  | ILMN_26207 | NM_138698.2    | -0.63820878  | 0.657348609 | 0.00926809 |
| <i>PAQR3</i>     | ILMN_20371 | NM_177453.2    | -0.640215369 | 0.683823498 | 0.00569143 |
| <i>HSF2</i>      | ILMN_3760  | NM_004506.2    | -0.640864075 | 0.758861543 | 0.00229860 |
| <i>GUK1</i>      | ILMN_18191 | NM_000858.4    | -0.640890663 | 1.421767573 | 0.00002100 |
| <i>BRF2</i>      | ILMN_2966  | NM_018310.2    | -0.641792347 | 0.712970641 | 0.00941033 |
| <i>LOC440348</i> | ILMN_12371 | NM_001018059.1 | -0.643288377 | 0.836871612 | 0.00364941 |
| <i>PRRT3</i>     | ILMN_19313 | NM_207351.2    | -0.644537989 | 0.90258133  | 0.00073831 |
| <i>H1FX</i>      | ILMN_26614 | NM_006026.2    | -0.645743275 | 0.726455223 | 0.00562703 |
| <i>HSPA5</i>     | ILMN_16546 | NM_005347.2    | -0.645854429 | 1.044504608 | 0.00076007 |
| <i>USP7</i>      | ILMN_3791  | NM_003470.1    | -0.645861103 | 0.765032434 | 0.00861637 |
| <i>RAGE</i>      | ILMN_5109  | NM_014226.1    | -0.646248862 | 0.816833521 | 0.00096010 |
| <i>HEAB</i>      | ILMN_17235 | NM_006831.1    | -0.647356002 | 0.95592989  | 0.00728557 |
| <i>CCDC59</i>    | ILMN_12564 | NM_014167.1    | -0.649844073 | 0.844038281 | 0.00199060 |
| <i>UBE2B</i>     | ILMN_19013 | NM_003337.2    | -0.650171493 | 0.856337935 | 0.00054149 |
| <i>TMEM1</i>     | ILMN_9744  | NM_003274.3    | -0.650272701 | 1.006083249 | 0.00003470 |
| <i>CXXC5</i>     | ILMN_10449 | NM_016463.5    | -0.650664893 | 0.600426859 | 0.00854733 |

|                 |             |             |              |             |            |
|-----------------|-------------|-------------|--------------|-------------|------------|
| <i>SRRM1</i>    | ILMN_2484   | NM_005839.2 | -0.650793883 | 1.344938502 | 0.00013658 |
| <i>SFRS3</i>    | ILMN_29649  | NM_003017.3 | -0.653578545 | 0.999498208 | 0.00997300 |
| <i>PDCL3</i>    | ILMN_30010  | NM_024065.3 | -0.654245679 | 0.941531099 | 0.00056039 |
| <i>PRR3</i>     | ILMN_21022  | NM_025263.1 | -0.654275478 | 1.237039594 | 0.00302803 |
| <i>BTAF1</i>    | ILMN_8616   | NM_003972.2 | -0.655041764 | 2.000675247 | 0.00000148 |
| <i>LAS1L</i>    | ILMN_10798  | NM_031206.2 | -0.655593111 | 1.230989934 | 0.00176207 |
| <i>SLC6A16</i>  | ILMN_10688  | NM_014037.2 | -0.656717923 | 0.83343565  | 0.00328586 |
| <i>PIM2</i>     | ILMN_27932  | NM_006875.2 | -0.657356732 | 0.93398096  | 0.00120534 |
| <i>KIAA1600</i> | ILMN_8082   | NM_020940.2 | -0.657609423 | 0.858231585 | 0.00665377 |
| <i>EXOSC2</i>   | ILMN_11049  | NM_014285.4 | -0.658469055 | 0.89439764  | 0.00137281 |
| <i>C6orf149</i> | ILMN_18141  | NM_020408.3 | -0.658551633 | 0.968041299 | 0.00207399 |
| <i>NUDT16L1</i> | ILMN_20270  | NM_032349.2 | -0.658754939 | 1.000965634 | 0.00011280 |
| <i>PQLC1</i>    | ILMN_5626   | NM_025078.3 | -0.658826711 | 1.46688705  | 0.00003286 |
| <i>TMC6</i>     | ILMN_19035  | NM_007267.5 | -0.659317538 | 0.988841774 | 0.00146505 |
| <i>SH3BP4</i>   | ILMN_138674 | NM_014521.1 | -0.659423978 | 1.080747687 | 0.00307405 |
| <i>C21orf66</i> | ILMN_15558  | NM_013329.2 | -0.660169817 | 1.360744855 | 0.00011543 |
| <i>RPL26</i>    | ILMN_139337 | NM_000987.2 | -0.660388215 | 0.838265035 | 0.00102103 |
| <i>JMJD2B</i>   | ILMN_2379   | NM_015015.1 | -0.660517636 | 0.764706358 | 0.00767484 |
| <i>ZNF431</i>   | ILMN_7008   | NM_133473.1 | -0.660741637 | 0.982149669 | 0.00093699 |
| <i>DGCR14</i>   | ILMN_694    | NM_022719.1 | -0.661198685 | 0.947293749 | 0.00241510 |
| <i>TEF</i>      | ILMN_7440   | NM_003216.2 | -0.66136378  | 1.177478992 | 0.00011265 |
| <i>POLE</i>     | ILMN_18431  | NM_006231.2 | -0.662672826 | 0.871053439 | 0.00362261 |
| <i>CRKRS</i>    | ILMN_9786   | NM_016507.1 | -0.663155806 | 1.024487964 | 0.00038030 |
| <i>LMNB2</i>    | ILMN_24712  | NM_032737.2 | -0.663422716 | 0.819620917 | 0.00522630 |
| <i>PPAN</i>     | ILMN_25948  | NM_020230.4 | -0.663459334 | 0.811996002 | 0.00656122 |
| <i>TRAF6</i>    | ILMN_8846   | NM_004620.2 | -0.664832171 | 1.183856973 | 0.00145782 |
| <i>ZNF238</i>   | ILMN_5128   | NM_205768.1 | -0.66538502  | 1.063282    | 0.00121218 |
| <i>DIP13B</i>   | ILMN_139404 | NM_018171.2 | -0.665918599 | 0.816448496 | 0.00182992 |
| <i>C1orf122</i> | ILMN_26311  | NM_198446.1 | -0.667704514 | 0.758544159 | 0.00554261 |
| <i>WDR79</i>    | ILMN_1814   | NM_018081.1 | -0.66887631  | 1.103656742 | 0.00682748 |
| <i>ZNF75A</i>   | ILMN_3468   | NM_153028.1 | -0.668953048 | 0.77004373  | 0.00387346 |

|                 |             |                |              |             |            |
|-----------------|-------------|----------------|--------------|-------------|------------|
| <b>EBPL</b>     | ILMN_18169  | NM_032565.1    | -0.669087401 | 0.948622616 | 0.00047601 |
| <b>SUV39H1</b>  | ILMN_6133   | NM_003173.1    | -0.670194855 | 0.975895869 | 0.00028897 |
| <b>MORC4</b>    | ILMN_5233   | NM_024657.2    | -0.670720191 | 1.081812244 | 0.00034502 |
| <b>RHOT2</b>    | ILMN_21353  | NM_138769.1    | -0.67287188  | 0.718635543 | 0.00588322 |
| <b>LSM5</b>     | ILMN_17896  | NM_012322.1    | -0.673056964 | 1.1919698   | 0.00001152 |
| <b>ZNF35</b>    | ILMN_15315  | NM_003420.2    | -0.676575556 | 1.219238883 | 0.00088914 |
| <b>IHPK1</b>    | ILMN_1661   | NM_153273.3    | -0.677703526 | 0.844737234 | 0.00342912 |
| <b>NOLA1</b>    | ILMN_137056 | NM_032993.1    | -0.677952037 | 1.201625866 | 0.00010415 |
| <b>ZNF545</b>   | ILMN_15084  | NM_133466.1    | -0.678360671 | 0.857507765 | 0.00077872 |
| <b>SCMH1</b>    | ILMN_5778   | NM_001031694.1 | -0.678476927 | 1.088681731 | 0.00117579 |
| <b>XPO4</b>     | ILMN_11492  | NM_022459.3    | -0.678501648 | 1.075202138 | 0.00048775 |
| <b>CCDC69</b>   | ILMN_12667  | NM_015621.2    | -0.680078881 | 0.782969982 | 0.00618847 |
| <b>CALM1</b>    | ILMN_137303 | NM_006888.2    | -0.680552658 | 0.845807834 | 0.00246513 |
| <b>C21orf57</b> | ILMN_21121  | NM_058181.1    | -0.683310928 | 0.78631219  | 0.00469043 |
| <b>RANBP3</b>   | ILMN_27457  | NM_003624.1    | -0.683827258 | 0.90891312  | 0.00063720 |
| <b>ZNF142</b>   | ILMN_11618  | NM_005081.2    | -0.684025915 | 1.286496115 | 0.00001617 |
| <b>CBLL1</b>    | ILMN_24021  | NM_024814.1    | -0.68419063  | 0.883478823 | 0.00615600 |
| <b>OTUD5</b>    | ILMN_8231   | NM_017602.2    | -0.684681416 | 0.824341727 | 0.00517850 |
| <b>C14orf4</b>  | ILMN_23475  | NM_024496.2    | -0.684736533 | 1.011836565 | 0.00048207 |
| <b>PP2447</b>   | ILMN_25172  | NM_025204.2    | -0.684755437 | 1.569550738 | 0.00005516 |
| <b>USP14</b>    | ILMN_137727 | NM_005151.2    | -0.684905707 | 0.865550813 | 0.00568072 |
| <b>SEC61B</b>   | ILMN_446    | NM_006808.2    | -0.687486258 | 0.670776632 | 0.00406423 |
| <b>RNF126</b>   | ILMN_5287   | NM_194460.1    | -0.68765419  | 1.014174257 | 0.00203408 |
| <b>OFD1</b>     | ILMN_10088  | NM_003611.1    | -0.687787909 | 0.825117046 | 0.00356926 |
| <b>RENT1</b>    | ILMN_138046 | NM_002911.2    | -0.687855528 | 0.699664811 | 0.00739681 |
| <b>ZNF17</b>    | ILMN_13772  | NM_006959.1    | -0.688040083 | 0.670592008 | 0.00734045 |
| <b>UBR1</b>     | ILMN_137462 | NM_174916.1    | -0.688734037 | 1.016853169 | 0.00193488 |
| <b>LTBP4</b>    | ILMN_21051  | NM_003573.1    | -0.690128055 | 0.744259013 | 0.00665099 |
| <b>DNMT3A</b>   | ILMN_26218  | NM_175630.1    | -0.690260033 | 1.570643653 | 0.00000747 |
| <b>GNL1</b>     | ILMN_3133   | NM_005275.2    | -0.691657668 | 1.02612133  | 0.00132046 |
| <b>ARID3B</b>   | ILMN_4032   | NM_006465.1    | -0.691793692 | 0.977354302 | 0.00033123 |

|                  |            |             |              |             |            |
|------------------|------------|-------------|--------------|-------------|------------|
| <i>LEPROTL1</i>  | ILMN_4515  | NM_015344.1 | -0.691937884 | 0.806940218 | 0.00299727 |
| <i>GRPEL1</i>    | ILMN_7749  | NM_025196.2 | -0.692082354 | 1.001336975 | 0.00070527 |
| <i>CSG1cA-T</i>  | ILMN_21838 | NM_019015.1 | -0.694221557 | 1.127669784 | 0.00026213 |
| <i>GCC1</i>      | ILMN_21168 | NM_024523.5 | -0.6951262   | 1.366586368 | 0.00003783 |
| <i>RAD23B</i>    | ILMN_19346 | NM_002874.3 | -0.695226728 | 1.102097779 | 0.00406715 |
| <i>LOC93081</i>  | ILMN_8559  | NM_138779.2 | -0.695301754 | 0.760850692 | 0.00280824 |
| <i>FLJ10374</i>  | ILMN_3627  | NM_018074.3 | -0.695464213 | 1.079974637 | 0.00457030 |
| <i>C17orf53</i>  | ILMN_17950 | NM_024032.2 | -0.696635685 | 1.255525354 | 0.00366275 |
| <i>NCK2</i>      | ILMN_8369  | NM_003581.2 | -0.696808439 | 0.886780127 | 0.00135857 |
| <i>C20orf52</i>  | ILMN_15797 | NM_080748.1 | -0.699212306 | 0.622463785 | 0.00379560 |
| <i>MLF1IP</i>    | ILMN_16700 | NM_024629.2 | -0.699384768 | 0.862592142 | 0.00813547 |
| <i>ZNF549</i>    | ILMN_12970 | NM_153263.1 | -0.699401199 | 0.741164155 | 0.00389691 |
| <i>CLYBL</i>     | ILMN_27821 | NM_206808.1 | -0.699524111 | 1.250909264 | 0.00053328 |
| <i>ZNF136</i>    | ILMN_7813  | NM_003437.2 | -0.700419265 | 0.833346179 | 0.00189626 |
| <i>STXBP5</i>    | ILMN_3767  | NM_139244.2 | -0.704314781 | 1.232465712 | 0.00019410 |
| <i>ALG9</i>      | ILMN_22873 | NM_024740.1 | -0.70462799  | 0.927910229 | 0.00503792 |
| <i>ZNF426</i>    | ILMN_13082 | NM_024106.1 | -0.705339858 | 0.961994526 | 0.00367733 |
| <i>DENND4C</i>   | ILMN_2455  | NM_017925.3 | -0.705529703 | 1.146949146 | 0.00115710 |
| <i>EIF1</i>      | ILMN_3037  | NM_005801.3 | -0.70553125  | 0.947529023 | 0.00032097 |
| <i>KLHL21</i>    | ILMN_14418 | NM_014851.2 | -0.706027126 | 0.898564478 | 0.00204385 |
| <i>ANK3</i>      | ILMN_2714  | NM_001149.2 | -0.706311526 | 0.911010591 | 0.00141958 |
| <i>MPP6</i>      | ILMN_28432 | NM_016447.2 | -0.707177805 | 0.740970318 | 0.00083022 |
| <i>CCL28</i>     | ILMN_1615  | NM_019846.3 | -0.708252508 | 1.273210594 | 0.00046153 |
| <i>SNTA1</i>     | ILMN_4031  | NM_003098.2 | -0.708334717 | 0.978312341 | 0.00055783 |
| <i>TARBP1</i>    | ILMN_14414 | NM_005646.2 | -0.709611231 | 0.976054013 | 0.00211269 |
| <i>JARID1A</i>   | ILMN_12150 | NM_005056.1 | -0.711271184 | 1.01467053  | 0.00143321 |
| <i>C20orf149</i> | ILMN_21879 | NM_024299.2 | -0.711320456 | 0.814646204 | 0.00387198 |
| <i>PILRB</i>     | ILMN_1984  | NM_175047.2 | -0.712138848 | 0.731016965 | 0.00355462 |
| <i>TERF1</i>     | ILMN_11986 | NM_017489.1 | -0.712178428 | 0.990225787 | 0.00113241 |
| <i>MSI2</i>      | ILMN_525   | NM_138962.2 | -0.712606214 | 1.035281345 | 0.00176819 |
| <i>MRPS18A</i>   | ILMN_2508  | NM_018135.2 | -0.714481425 | 1.271085307 | 0.00053144 |



|                  |            |                |              |             |            |
|------------------|------------|----------------|--------------|-------------|------------|
| <i>C3orf39</i>   | ILMN_2070  | NM_032806.4    | -0.714496822 | 1.136707686 | 0.00013448 |
| <i>PCSK5</i>     | ILMN_6597  | NM_006200.2    | -0.715939114 | 1.036876117 | 0.00035864 |
| <i>DPP9</i>      | ILMN_26244 | NM_139159.3    | -0.716419901 | 0.912894052 | 0.00060259 |
| <i>EDD1</i>      | ILMN_11309 | NM_015902.4    | -0.716696292 | 2.001580199 | 0.00003324 |
| <i>C16orf7</i>   | ILMN_693   | NM_004913.1    | -0.717368103 | 0.922793072 | 0.00483044 |
| <i>SLC2A4RG</i>  | ILMN_11640 | NM_020062.3    | -0.717939345 | 0.844967139 | 0.00210980 |
| <i>SBF1</i>      | ILMN_22729 | NM_002972.1    | -0.719573729 | 0.872216344 | 0.00261564 |
| <i>N4BP2</i>     | ILMN_7118  | NM_018177.2    | -0.720407286 | 0.643502768 | 0.00329044 |
| <i>CCNK</i>      | ILMN_4502  | NM_003858.2    | -0.72058077  | 1.458689467 | 0.00010225 |
| <i>EHD1</i>      | ILMN_17263 | NM_006795.2    | -0.720719364 | 0.766609451 | 0.00483019 |
| <i>BANP</i>      | ILMN_8638  | NM_079837.1    | -0.722372231 | 0.865374603 | 0.00546821 |
| <i>TNIP2</i>     | ILMN_6730  | NM_024309.2    | -0.72274032  | 1.019287814 | 0.00361216 |
| <i>ZNF274</i>    | ILMN_6185  | NM_016324.2    | -0.723234244 | 1.165667625 | 0.00001985 |
| <i>STAT5B</i>    | ILMN_16004 | NM_012448.3    | -0.724319615 | 0.858281253 | 0.00926193 |
| <i>ASB6</i>      | ILMN_13316 | NM_177999.1    | -0.72611613  | 0.921960087 | 0.00553967 |
| <i>NY-SAR-48</i> | ILMN_2230  | NM_001011699.1 | -0.727033786 | 1.317919304 | 0.00086801 |
| <i>U2AF1L3</i>   | ILMN_8757  | NM_144987.1    | -0.72871967  | 1.092424247 | 0.00016495 |
| <i>CEBPZ</i>     | ILMN_10421 | NM_005760.2    | -0.72887728  | 0.967945932 | 0.00257282 |
| <i>SNRPA1</i>    | ILMN_1523  | NM_003090.2    | -0.729357658 | 1.157672317 | 0.00072721 |
| <i>ZNF593</i>    | ILMN_20499 | NM_015871.2    | -0.729711215 | 0.870749371 | 0.00144956 |
| <i>DLNB14</i>    | ILMN_6803  | NM_198489.1    | -0.7305056   | 1.233687869 | 0.00130973 |
| <i>ACOT4</i>     | ILMN_5812  | NM_152331.2    | -0.730543719 | 0.709395594 | 0.00449761 |
| <i>PARC</i>      | ILMN_14183 | NM_015089.2    | -0.730864807 | 0.732382684 | 0.00622436 |
| <i>AYTL2</i>     | ILMN_15076 | NM_024830.3    | -0.731746218 | 1.019606414 | 0.00177154 |
| <i>MLL4</i>      | ILMN_28047 | NM_014727.1    | -0.732461775 | 0.926478158 | 0.00075914 |
| <i>ABCF1</i>     | ILMN_6938  | NM_001090.2    | -0.732508988 | 1.080306669 | 0.00095497 |
| <i>ATG9A</i>     | ILMN_24497 | NM_024085.2    | -0.733386266 | 0.893550371 | 0.00569509 |
| <i>C1orf33</i>   | ILMN_1930  | NM_016183.2    | -0.735053733 | 1.273787628 | 0.00058830 |
| <i>PLEKHG4</i>   | ILMN_11658 | NM_015432.2    | -0.735675634 | 0.781101106 | 0.00809126 |
| <i>CYLD</i>      | ILMN_28818 | NM_015247.1    | -0.735700277 | 0.925754857 | 0.00099722 |
| <i>ACRC</i>      | ILMN_21976 | NM_052957.2    | -0.736674197 | 0.993429353 | 0.00204543 |

|                    |             |                |              |             |            |
|--------------------|-------------|----------------|--------------|-------------|------------|
| <i>UXT</i>         | ILMN_2795   | NM_004182.2    | -0.736776229 | 1.01746461  | 0.00008724 |
| <i>MYH3</i>        | ILMN_20953  | NM_002470.1    | -0.737874135 | 1.01897372  | 0.00311632 |
| <i>DDX39</i>       | ILMN_19976  | NM_005804.2    | -0.738861267 | 1.494534945 | 0.00001645 |
| <i>PRKCA</i>       | ILMN_24085  | NM_002737.2    | -0.74026775  | 1.830687543 | 0.00002155 |
| <i>LOC55565</i>    | ILMN_22894  | NM_017530.1    | -0.740330872 | 1.103927452 | 0.00127144 |
| <i>PARP15</i>      | ILMN_3312   | NM_152615.1    | -0.740519502 | 0.59182088  | 0.00922714 |
| <i>UBE2J1</i>      | ILMN_12301  | NM_016021.2    | -0.741117847 | 1.006081046 | 0.00022877 |
| <i>LCMT2</i>       | ILMN_7283   | NM_014793.3    | -0.74274383  | 0.744741119 | 0.00146696 |
| <i>bA16L21.2.1</i> | ILMN_13855  | NM_001015882.1 | -0.742794207 | 0.714961107 | 0.00950935 |
| <i>ELL</i>         | ILMN_23957  | NM_006532.2    | -0.742801328 | 0.941853782 | 0.00238549 |
| <i>NARG1</i>       | ILMN_16240  | NM_057175.3    | -0.743022897 | 0.99023172  | 0.00691777 |
| <i>NELF</i>        | ILMN_28709  | NM_015537.3    | -0.743522541 | 0.667130343 | 0.00722468 |
| <i>FOXP1</i>       | ILMN_20586  | NM_032682.4    | -0.744323801 | 1.338638759 | 0.00012440 |
| <i>KBTBD2</i>      | ILMN_2507   | NM_015483.1    | -0.745628316 | 1.151680836 | 0.00011902 |
| <i>HMGCS1</i>      | ILMN_18980  | NM_002130.4    | -0.748106632 | 1.188287026 | 0.00046412 |
| <i>TAF5L</i>       | ILMN_6872   | NM_014409.3    | -0.749085176 | 0.868547839 | 0.00092389 |
| <i>RNF138</i>      | ILMN_587    | NM_016271.3    | -0.752277852 | 1.235057135 | 0.00009252 |
| <i>EID3</i>        | ILMN_22737  | NM_001008394.1 | -0.753211703 | 0.983834177 | 0.00177572 |
| <i>BTBD6</i>       | ILMN_28665  | NM_033271.1    | -0.753404502 | 1.357730493 | 0.00020193 |
| <i>ELK4</i>        | ILMN_16457  | NM_021795.2    | -0.755005589 | 0.67188118  | 0.00715763 |
| <i>TPST1</i>       | ILMN_2477   | NM_003596.2    | -0.755507792 | 1.228445923 | 0.00011312 |
| <i>RG9MTD1</i>     | ILMN_26970  | NM_017819.1    | -0.756251186 | 0.997215873 | 0.00046399 |
| <i>HYPE</i>        | ILMN_24815  | NM_007076.2    | -0.756371069 | 1.076873012 | 0.00190176 |
| <i>SNX26</i>       | ILMN_12508  | NM_052948.2    | -0.758065079 | 0.8931702   | 0.00074244 |
| <i>CAMK1G</i>      | ILMN_28359  | NM_020439.2    | -0.758706082 | 0.831151411 | 0.00712541 |
| <i>TOPORS</i>      | ILMN_20252  | NM_005802.2    | -0.759046826 | 1.053204205 | 0.00024076 |
| <i>PRSS15</i>      | ILMN_5804   | NM_004793.2    | -0.759266614 | 0.907428592 | 0.00120227 |
| <i>TUBA1</i>       | ILMN_20363  | NM_006000.1    | -0.760742973 | 0.712101421 | 0.00570485 |
| <i>RPL37A</i>      | ILMN_137134 | NM_000998.3    | -0.760816832 | 0.867875221 | 0.00096298 |
| <i>MADD</i>        | ILMN_9428   | NM_130471.1    | -0.763259324 | 0.924374443 | 0.00427367 |
| <i>MIF</i>         | ILMN_26688  | NM_002415.1    | -0.763324033 | 0.748772869 | 0.00266627 |

|                      |            |             |              |             |            |
|----------------------|------------|-------------|--------------|-------------|------------|
| <i>UBE2O</i>         | ILMN_17049 | NM_022066.2 | -0.763507156 | 1.161334399 | 0.00644586 |
| <i>FLJ44216</i>      | ILMN_16903 | NM_198567.1 | -0.764370213 | 0.90170466  | 0.00705292 |
| <i>RBJ</i>           | ILMN_30155 | NM_016544.1 | -0.76469689  | 0.978556237 | 0.00239779 |
| <i>STAT4</i>         | ILMN_8937  | NM_003151.2 | -0.765414901 | 0.907546517 | 0.00158587 |
| <i>ELK4</i>          | ILMN_7899  | NM_001973.2 | -0.765582106 | 1.085812566 | 0.00565791 |
| <i>YPEL5</i>         | ILMN_8828  | NM_016061.1 | -0.765651622 | 0.877344177 | 0.00894663 |
| <i>ZNF548</i>        | ILMN_16141 | NM_152909.2 | -0.766023955 | 0.9212858   | 0.00022428 |
| <i>VPS11</i>         | ILMN_13229 | NM_021729.4 | -0.766315738 | 1.106426752 | 0.00010581 |
| <i>SAV1</i>          | ILMN_15731 | NM_021818.2 | -0.767096079 | 0.888541282 | 0.00128585 |
| <i>ZNF447</i>        | ILMN_16020 | NM_023926.3 | -0.768713349 | 0.826659263 | 0.00080815 |
| <i>EYA3</i>          | ILMN_23590 | NM_172098.1 | -0.769040512 | 0.942443665 | 0.00038469 |
| <i>MESDC1</i>        | ILMN_18570 | NM_022566.1 | -0.770159479 | 1.08221592  | 0.00685104 |
| <i>EML4</i>          | ILMN_21821 | NM_019063.2 | -0.771210818 | 0.785648246 | 0.00704352 |
| <i>RBM12</i>         | ILMN_3104  | NM_006047.4 | -0.773445395 | 1.256818095 | 0.00004835 |
| <i>SUPT3H</i>        | ILMN_4557  | NM_003599.1 | -0.775989516 | 0.790995011 | 0.00654034 |
| <i>PELO</i>          | ILMN_19741 | NM_015946.4 | -0.777913817 | 0.828611002 | 0.00586600 |
| <i>C17orf63</i>      | ILMN_5219  | NM_018182.1 | -0.779026498 | 1.527509018 | 0.00000522 |
| <i>NFKBIA</i>        | ILMN_6745  | NM_020529.1 | -0.780491608 | 0.650591266 | 0.00530786 |
| <i>SLC20A2</i>       | ILMN_29659 | NM_006749.3 | -0.782979975 | 1.033443966 | 0.00285246 |
| <i>TDP1</i>          | ILMN_12296 | NM_018319.3 | -0.783501996 | 1.750778225 | 0.00003375 |
| <i>ZBTB25</i>        | ILMN_7193  | NM_006977.2 | -0.783772367 | 1.293682365 | 0.00001214 |
| <i>TRAPPC6A</i>      | ILMN_1174  | NM_024108.1 | -0.783976007 | 0.952296907 | 0.00066233 |
| <i>PPIE</i>          | ILMN_13734 | NM_203456.1 | -0.784546972 | 0.738368064 | 0.00695734 |
| <i>RAD54L2</i>       | ILMN_30244 | NM_015106.1 | -0.785402093 | 1.01822683  | 0.00082883 |
| <i>DKFZp434K1815</i> | ILMN_12314 | NM_152892.1 | -0.786393593 | 1.017330098 | 0.00076794 |
| <i>SFI1</i>          | ILMN_23938 | NM_014775.2 | -0.786495819 | 1.077617495 | 0.00192246 |
| <i>GPATC4</i>        | ILMN_839   | NM_182679.1 | -0.787986184 | 1.138781761 | 0.00084221 |
| <i>SKIV2L</i>        | ILMN_646   | NM_006929.4 | -0.789248907 | 1.727502765 | 0.00001265 |
| <i>LUZP1</i>         | ILMN_2667  | NM_033631.2 | -0.796097071 | 0.967871182 | 0.00268820 |
| <i>MNT</i>           | ILMN_21283 | NM_020310.2 | -0.7978727   | 1.20884313  | 0.00070966 |
| <i>BRPF3</i>         | ILMN_8164  | NM_015695.1 | -0.798153286 | 1.272715574 | 0.00000760 |

|                      |            |                |              |             |            |
|----------------------|------------|----------------|--------------|-------------|------------|
| <i>PRDM4</i>         | ILMN_1579  | NM_012406.3    | -0.79826194  | 1.253362778 | 0.00020244 |
| <i>NFKBIZ</i>        | ILMN_16362 | NM_001005474.1 | -0.800584648 | 0.745885878 | 0.00925134 |
| <i>STAG3</i>         | ILMN_28713 | NM_012447.2    | -0.801293102 | 0.803248924 | 0.00395595 |
| <i>SFPQ</i>          | ILMN_5703  | NM_005066.1    | -0.802153677 | 0.928784898 | 0.00036238 |
| <i>TWISTNB</i>       | ILMN_24604 | NM_001002926.1 | -0.802196716 | 1.019362059 | 0.00157788 |
| <i>CITED4</i>        | ILMN_15271 | NM_133467.2    | -0.803333157 | 0.992074124 | 0.00086738 |
| <i>DOCK9</i>         | ILMN_12914 | NM_015296.1    | -0.805523629 | 1.147821312 | 0.00005151 |
| <i>CTRL</i>          | ILMN_21415 | NM_001907.1    | -0.806071732 | 0.807620012 | 0.00331623 |
| <i>UBXD4</i>         | ILMN_23019 | NM_181713.3    | -0.807345562 | 0.860528095 | 0.00123436 |
| <i>RALGDS</i>        | ILMN_9432  | NM_006266.2    | -0.807833401 | 0.996741813 | 0.00054221 |
| <i>DKFZp686L1814</i> | ILMN_26192 | NM_194282.1    | -0.808475893 | 1.037713738 | 0.00023363 |
| <i>PXN</i>           | ILMN_14932 | NM_002859.1    | -0.809403238 | 0.809655666 | 0.00041816 |
| <i>C9orf28</i>       | ILMN_20760 | NM_033446.1    | -0.809751743 | 0.803182923 | 0.00936620 |
| <i>IL4R</i>          | ILMN_17789 | NM_000418.2    | -0.810302045 | 0.973385568 | 0.00071234 |
| <i>RPL13</i>         | ILMN_2271  | NM_033251.1    | -0.810746203 | 1.137734142 | 0.00006465 |
| <i>TXNDC11</i>       | ILMN_17937 | NM_015914.5    | -0.810961885 | 1.01531958  | 0.00912042 |
| <i>ZXDB</i>          | ILMN_4827  | NM_007157.3    | -0.812239002 | 1.025037862 | 0.00016710 |
| <i>ABCB1</i>         | ILMN_7395  | NM_000927.3    | -0.813841941 | 0.830184605 | 0.00187186 |
| <i>SLC10A3</i>       | ILMN_4203  | NM_019848.2    | -0.814201516 | 0.77976641  | 0.00419819 |
| <i>GFPT1</i>         | ILMN_5797  | NM_002056.1    | -0.815838939 | 1.010349776 | 0.00913416 |
| <i>YAF2</i>          | ILMN_19509 | NM_001012424.1 | -0.817039087 | 1.544588783 | 0.00007635 |
| <i>CRTC2</i>         | ILMN_28825 | NM_181715.1    | -0.819154628 | 1.149987942 | 0.00102618 |
| <i>GSPT1</i>         | ILMN_5039  | NM_002094.1    | -0.819395045 | 1.123312625 | 0.00198255 |
| <i>FLJ31204</i>      | ILMN_14285 | NM_174912.2    | -0.82136343  | 1.204204377 | 0.00070829 |
| <i>POMT1</i>         | ILMN_18145 | NM_007171.2    | -0.821400025 | 0.961685443 | 0.00626720 |
| <i>FLJ38964</i>      | ILMN_22580 | NM_173527.1    | -0.821475189 | 1.096974111 | 0.00212659 |
| <i>TBC1D15</i>       | ILMN_20610 | NM_022771.3    | -0.821648635 | 1.158524645 | 0.00067360 |
| <i>AXIN1</i>         | ILMN_6274  | NM_181050.1    | -0.822583751 | 0.790015272 | 0.00511492 |
| <i>FKBP11</i>        | ILMN_14765 | NM_016594.1    | -0.823000352 | 0.74672709  | 0.00267008 |
| <i>KIAA0961</i>      | ILMN_26156 | NM_014898.1    | -0.824726521 | 1.080504235 | 0.00146065 |
| <i>PLEKHG2</i>       | ILMN_4000  | NM_022835.1    | -0.825611045 | 1.267875781 | 0.00079500 |

|                  |             |                |              |             |            |
|------------------|-------------|----------------|--------------|-------------|------------|
| <i>C20orf11</i>  | ILMN_27220  | NM_017896.2    | -0.827007513 | 1.128744745 | 0.00003984 |
| <i>PIAS2</i>     | ILMN_11074  | NM_173206.2    | -0.830152143 | 1.456467935 | 0.00131011 |
| <i>RUNX3</i>     | ILMN_16236  | NM_004350.1    | -0.830408072 | 1.178110719 | 0.00021931 |
| <i>RAPGEF6</i>   | ILMN_6036   | NM_016340.3    | -0.830860715 | 0.719502179 | 0.00450501 |
| <i>HPS4</i>      | ILMN_5996   | NM_152843.1    | -0.831101249 | 1.850462398 | 0.00002616 |
| <i>ATP2C1</i>    | ILMN_16216  | NM_014382.2    | -0.8314472   | 1.496804384 | 0.00032372 |
| <i>MPP5</i>      | ILMN_21733  | NM_022474.2    | -0.831785694 | 1.231105814 | 0.00021771 |
| <i>EBI2</i>      | ILMN_5986   | NM_004951.3    | -0.832449329 | 0.736312502 | 0.00715280 |
| <i>CCDC58</i>    | ILMN_27140  | NM_001017928.2 | -0.833159452 | 1.090267998 | 0.00039098 |
| <i>ZNF101</i>    | ILMN_10157  | NM_033204.2    | -0.835053726 | 0.883406529 | 0.00125971 |
| <i>CCDC45</i>    | ILMN_24620  | NM_138363.1    | -0.83514053  | 1.715922417 | 0.00000317 |
| <i>DGKD</i>      | ILMN_2079   | NM_152879.2    | -0.837081703 | 1.214349576 | 0.00006287 |
| <i>JUND</i>      | ILMN_29325  | NM_005354.2    | -0.839529854 | 1.44576351  | 0.00000068 |
| <i>CALR</i>      | ILMN_18909  | NM_004343.2    | -0.840122952 | 0.980075778 | 0.00025069 |
| <i>ASNS</i>      | ILMN_14195  | NM_133436.1    | -0.840850315 | 1.139496001 | 0.00001648 |
| <i>IPO4</i>      | ILMN_26191  | NM_024658.3    | -0.841511864 | 1.222419638 | 0.00002488 |
| <i>MOAP1</i>     | ILMN_10935  | NM_022151.4    | -0.841645123 | 1.343199607 | 0.00008726 |
| <i>MGC40579</i>  | ILMN_6451   | NM_152776.1    | -0.842645626 | 0.934865684 | 0.00247629 |
| <i>ERCC5</i>     | ILMN_13388  | NM_000123.2    | -0.843937201 | 1.129758717 | 0.00031986 |
| <i>CIB1</i>      | ILMN_11794  | NM_006384.2    | -0.844079627 | 1.058491226 | 0.00150153 |
| <i>C14orf169</i> | ILMN_4108   | NM_024644.1    | -0.845960892 | 1.269502867 | 0.00002600 |
| <i>ALDOC</i>     | ILMN_15767  | NM_005165.2    | -0.845999485 | 1.06749991  | 0.00086194 |
| <i>LOC56902</i>  | ILMN_26243  | NM_020143.2    | -0.846100126 | 0.754187475 | 0.00240439 |
| <i>RRM1</i>      | ILMN_14789  | NM_001033.2    | -0.846190811 | 0.88356385  | 0.00601741 |
| <i>C14orf32</i>  | ILMN_24999  | NM_144578.2    | -0.8467791   | 1.110496493 | 0.00648758 |
| <i>ZNF484</i>    | ILMN_2513   | NM_031486.1    | -0.847260349 | 0.983148562 | 0.00087595 |
| <i>DNAJB2</i>    | ILMN_137328 | NM_006736.4    | -0.847437659 | 1.454772657 | 0.00000649 |
| <i>SBDS</i>      | ILMN_15766  | NM_016038.2    | -0.847947777 | 0.599100733 | 0.00910234 |
| <i>LITAF</i>     | ILMN_7898   | NM_004862.2    | -0.848079954 | 1.064922674 | 0.00250002 |
| <i>SNRK</i>      | ILMN_5234   | NM_017719.3    | -0.849034935 | 1.225928527 | 0.00032831 |
| <i>DPP4</i>      | ILMN_20248  | NM_001935.3    | -0.849217133 | 0.77184925  | 0.00411250 |

|                   |             |                |              |             |            |
|-------------------|-------------|----------------|--------------|-------------|------------|
| <i>TFRC</i>       | ILMN_12909  | NM_003234.1    | -0.84942199  | 1.14393614  | 0.00014138 |
| <i>CACNA2D2</i>   | ILMN_15989  | NM_001005505.1 | -0.849869058 | 0.79755057  | 0.00438546 |
| <i>MAP6D1</i>     | ILMN_7455   | NM_024871.1    | -0.85096354  | 1.037983445 | 0.00367303 |
| <i>MGC4728</i>    | ILMN_1981   | NM_198542.1    | -0.851368338 | 1.04653516  | 0.00004789 |
| <i>HSPC176</i>    | ILMN_26849  | NM_016209.1    | -0.852041704 | 1.178838591 | 0.00001505 |
| <i>DNAJB1</i>     | ILMN_19740  | NM_006145.1    | -0.852508634 | 0.85068799  | 0.00581678 |
| <i>COCH</i>       | ILMN_7401   | NM_004086.1    | -0.853301185 | 1.006291485 | 0.00224105 |
| <i>ST6GALNAC4</i> | ILMN_137977 | NM_175040.1    | -0.854315521 | 1.779605121 | 0.00000418 |
| <i>FOXP1</i>      | ILMN_21389  | NM_001012505.1 | -0.854606153 | 1.423320073 | 0.00019417 |
| <i>ZNF324</i>     | ILMN_29920  | NM_014347.1    | -0.856946591 | 0.781397595 | 0.00557212 |
| <i>RPS7</i>       | ILMN_10275  | NM_001011.3    | -0.856988557 | 0.802701927 | 0.00150351 |
| <i>ZBED4</i>      | ILMN_8641   | NM_014838.1    | -0.859713393 | 1.523638248 | 0.00003818 |
| <i>ZFP42</i>      | ILMN_137432 | NM_174900.2    | -0.859725141 | 1.19719526  | 0.00295165 |
| <i>POLR1C</i>     | ILMN_26638  | NM_203290.1    | -0.860212976 | 1.192204871 | 0.00013691 |
| <i>GARNL1</i>     | ILMN_2823   | NM_194301.2    | -0.861956735 | 1.353019331 | 0.00032433 |
| <i>LANCL2</i>     | ILMN_920    | NM_018697.3    | -0.862500848 | 1.173455357 | 0.00105055 |
| <i>TPM2</i>       | ILMN_22618  | NM_213674.1    | -0.862570029 | 0.757707188 | 0.00573649 |
| <i>LGMM</i>       | ILMN_20242  | NM_005606.5    | -0.863810044 | 0.698299435 | 0.00748695 |
| <i>RAB11FIP3</i>  | ILMN_7754   | NM_014700.2    | -0.864253745 | 1.039540889 | 0.00011007 |
| <i>PWP2H</i>      | ILMN_28098  | NM_005049.2    | -0.864825833 | 1.15514266  | 0.00041590 |
| <i>JAM3</i>       | ILMN_25295  | NM_032801.3    | -0.866648014 | 0.642975938 | 0.00684587 |
| <i>SRRM2</i>      | ILMN_21088  | NM_016333.2    | -0.866980414 | 0.656284143 | 0.00615188 |
| <i>CHD1</i>       | ILMN_27142  | NM_001270.2    | -0.867782711 | 0.915916348 | 0.00428004 |
| <i>DRD3</i>       | ILMN_137372 | NM_033663.2    | -0.868703905 | 0.749723692 | 0.00579986 |
| <i>ASCC3L1</i>    | ILMN_18834  | NM_014014.2    | -0.868807333 | 1.377643623 | 0.00001703 |
| <i>MGMT</i>       | ILMN_18705  | NM_002412.2    | -0.869575292 | 0.843019505 | 0.00366941 |
| <i>NFKBIB</i>     | ILMN_8370   | NM_001001716.1 | -0.871643725 | 1.022728781 | 0.00128423 |
| <i>TCP11L2</i>    | ILMN_21615  | NM_152772.1    | -0.872360842 | 0.87759018  | 0.00602482 |
| <i>MARCH6</i>     | ILMN_2629   | NM_005885.2    | -0.874989813 | 0.996225291 | 0.00361251 |
| <i>NARG1L</i>     | ILMN_9228   | NM_018527.2    | -0.875950484 | 1.25430275  | 0.00011058 |
| <i>FYN</i>        | ILMN_5919   | NM_002037.3    | -0.877027664 | 1.138050737 | 0.00037810 |

|                  |            |               |              |             |            |
|------------------|------------|---------------|--------------|-------------|------------|
| <b>ZNF250</b>    | ILMN_25690 | NM_021061.1   | -0.877490052 | 0.971425594 | 0.00079302 |
| <b>SESN3</b>     | ILMN_11604 | NM_144665.2   | -0.879944442 | 1.134947842 | 0.00164548 |
| <b>RIMS3</b>     | ILMN_21581 | NM_014747.2   | -0.886401668 | 1.720794738 | 0.00002887 |
| <b>SNX25</b>     | ILMN_8556  | NM_031953.2   | -0.886699432 | 1.255349214 | 0.00001795 |
| <b>JARID1B</b>   | ILMN_14812 | NM_006618.3   | -0.886935531 | 1.409279841 | 0.00008858 |
| <b>PITPNC1</b>   | ILMN_12660 | NM_181671.1   | -0.888673165 | 1.417624087 | 0.00006531 |
| <b>B4GALT1</b>   | ILMN_20711 | NM_001497.2   | -0.888931145 | 0.715047063 | 0.00673477 |
| <b>POLS</b>      | ILMN_866   | NM_006999.3   | -0.890007455 | 1.414254344 | 0.00001205 |
| <b>SLC22A17</b>  | ILMN_10076 | NM_016609.3   | -0.891041878 | 0.812773625 | 0.00232667 |
| <b>CABLES2</b>   | ILMN_28000 | NM_031215.1   | -0.891745112 | 1.363327575 | 0.00049764 |
| <b>PTPRM</b>     | ILMN_19957 | NM_002845.2   | -0.892112842 | 1.097184571 | 0.00293499 |
| <b>ABHD14B</b>   | ILMN_24812 | NM_032750.1   | -0.892326662 | 1.44224977  | 0.00004053 |
| <b>EBP</b>       | ILMN_12837 | NM_006579.1   | -0.896139529 | 0.795734565 | 0.00203677 |
| <b>PLCG1</b>     | ILMN_3773  | NM_002660.2   | -0.896364198 | 0.806098446 | 0.00364560 |
| <b>MGC11257</b>  | ILMN_22349 | NM_032350.3   | -0.898197114 | 1.023241639 | 0.00025317 |
| <b>THUMPD2</b>   | ILMN_25512 | NM_025264.2   | -0.90015255  | 1.328191704 | 0.00000093 |
| <b>CD28</b>      | ILMN_5437  | NM_006139.1   | -0.901792636 | 0.970867535 | 0.00007722 |
| <b>NUP155</b>    | ILMN_1051  | NM_004298.2   | -0.904508354 | 1.137552613 | 0.00027759 |
| <b>MASTL</b>     | ILMN_7073  | NM_032844.1   | -0.906272759 | 1.009884304 | 0.00188459 |
| <b>VIL2</b>      | ILMN_2940  | NM_003379.3   | -0.90719828  | 0.809621514 | 0.00631678 |
| <b>CDR2</b>      | ILMN_10283 | NM_001802.1   | -0.907555245 | 0.920461232 | 0.00017280 |
| <b>AHCTF1</b>    | ILMN_28711 | NM_015446.3   | -0.907937518 | 1.662012186 | 0.00005143 |
| <b>ITK</b>       | ILMN_23317 | NM_005546.3   | -0.909896826 | 0.956548738 | 0.00023181 |
| <b>NDST2</b>     | ILMN_21220 | NM_003635.2   | -0.910459655 | 1.365135533 | 0.00022155 |
| <b>ZNF317</b>    | ILMN_22884 | NM_020933.2   | -0.910607633 | 1.561177388 | 0.00000864 |
| <b>PAG1</b>      | ILMN_20316 | NM_018440.3   | -0.914077327 | 1.177056311 | 0.00039575 |
| <b>SLC25A26</b>  | ILMN_21381 | NM_173471.1   | -0.914244004 | 1.329568646 | 0.00099660 |
| <b>CIC</b>       | ILMN_14588 | NM_015125.2   | -0.914603265 | 0.98731765  | 0.00130412 |
| <b>PELP1</b>     | ILMN_15422 | NM_014389.1   | -0.91485887  | 1.461682055 | 0.00004063 |
| <b>KIAA1285</b>  | ILMN_8883  | NM_015694.1   | -0.916008576 | 0.757897482 | 0.00508342 |
| <b>LOC130074</b> | ILMN_26225 | NM_00100993.1 | -0.916194238 | 1.275412306 | 0.00013399 |

|                 |             |             |              |             |            |
|-----------------|-------------|-------------|--------------|-------------|------------|
| <i>HSPC023</i>  | ILMN_24668  | NM_014047.1 | -0.917531536 | 1.085247037 | 0.00017209 |
| <i>PPRC1</i>    | ILMN_10445  | NM_015062.3 | -0.918683753 | 1.44933188  | 0.00000951 |
| <i>TGIF2</i>    | ILMN_25134  | NM_021809.4 | -0.919181739 | 1.070845819 | 0.00620873 |
| <i>PPARD</i>    | ILMN_139271 | NM_006238.2 | -0.922036255 | 0.949581608 | 0.00400146 |
| <i>CHCHD6</i>   | ILMN_19685  | NM_032343.1 | -0.922760945 | 1.685898574 | 0.00001234 |
| <i>RPL41</i>    | ILMN_5276   | NM_021104.1 | -0.927604921 | 0.939022696 | 0.00014426 |
| <i>FAM100B</i>  | ILMN_22874  | NM_182565.2 | -0.927975076 | 1.381430879 | 0.00001068 |
| <i>C9orf111</i> | ILMN_22221  | NM_152286.2 | -0.928190875 | 1.062704382 | 0.00034302 |
| <i>EDG1</i>     | ILMN_138993 | NM_001400.2 | -0.929786795 | 0.705014559 | 0.00565600 |
| <i>RCL1</i>     | ILMN_18208  | NM_005772.2 | -0.930738874 | 1.023725888 | 0.00021865 |
| <i>LMBR1L</i>   | ILMN_27914  | NM_018113.1 | -0.931048642 | 1.503486864 | 0.00025559 |
| <i>ZNF551</i>   | ILMN_4569   | NM_138347.2 | -0.932518582 | 1.640473641 | 0.00001422 |
| <i>TOE1</i>     | ILMN_11173  | NM_025077.2 | -0.934242822 | 1.467344759 | 0.00010122 |
| <i>PSME4</i>    | ILMN_10890  | NM_014614.1 | -0.934832764 | 1.295787201 | 0.00025690 |
| <i>ZBTB16</i>   | ILMN_11903  | NM_006006.4 | -0.935257759 | 0.713736086 | 0.00683700 |
| <i>DXYS155E</i> | ILMN_26209  | NM_005088.2 | -0.937911248 | 1.224959495 | 0.00023307 |
| <i>LONRF1</i>   | ILMN_138605 | NM_152271.2 | -0.937927017 | 0.870537082 | 0.00948435 |
| <i>FLJ39779</i> | ILMN_12781  | NM_207442.1 | -0.939277125 | 0.927670032 | 0.00924437 |
| <i>LSG1</i>     | ILMN_6416   | NM_018385.1 | -0.94456847  | 0.979257112 | 0.00061345 |
| <i>MYL5</i>     | ILMN_21416  | NM_002477.1 | -0.945374141 | 1.293359335 | 0.00008484 |
| <i>AHI1</i>     | ILMN_23469  | NM_017651.3 | -0.945865402 | 1.319394148 | 0.00013258 |
| <i>TIGA1</i>    | ILMN_2113   | NM_053000.1 | -0.948258709 | 1.60679229  | 0.00000074 |
| <i>ZNF707</i>   | ILMN_20149  | NM_173831.2 | -0.951346105 | 1.340592694 | 0.00053180 |
| <i>CDC37L1</i>  | ILMN_559    | NM_017913.2 | -0.954095558 | 1.157427303 | 0.00047442 |
| <i>ERN1</i>     | ILMN_20244  | NM_152461.2 | -0.954332751 | 0.889607391 | 0.00034558 |
| <i>DHRS3</i>    | ILMN_12432  | NM_004753.4 | -0.954439327 | 1.353544551 | 0.00003756 |
| <i>WRN</i>      | ILMN_3783   | NM_000553.2 | -0.954452783 | 1.021016836 | 0.00116067 |
| <i>URG4</i>     | ILMN_13027  | NM_017920.2 | -0.95589912  | 1.422396175 | 0.00007026 |
| <i>SMURF1</i>   | ILMN_10493  | NM_181349.1 | -0.95594376  | 0.879615015 | 0.00245662 |
| <i>HES6</i>     | ILMN_4854   | NM_018645.3 | -0.95725005  | 0.633823723 | 0.00695471 |
| <i>USF2</i>     | ILMN_6055   | NM_207291.1 | -0.959901269 | 1.066664218 | 0.00035373 |



|                  |             |                |              |             |            |
|------------------|-------------|----------------|--------------|-------------|------------|
| <i>HIVEP2</i>    | ILMN_21520  | NM_006734.2    | -0.960694265 | 1.07910833  | 0.00266549 |
| <i>CLASP1</i>    | ILMN_14659  | NM_015282.1    | -0.961804572 | 1.602890635 | 0.00000137 |
| <i>ZNF395</i>    | ILMN_17231  | NM_018660.2    | -0.962316466 | 1.309008827 | 0.00003382 |
| <i>PHF17</i>     | ILMN_1535   | NM_024900.2    | -0.963425077 | 1.235639669 | 0.00006684 |
| <i>NR1H2</i>     | ILMN_137460 | NM_007121.2    | -0.965620392 | 1.016136008 | 0.00208002 |
| <i>MGC26885</i>  | ILMN_6572   | NM_152339.2    | -0.965624618 | 0.755387041 | 0.00213942 |
| <i>DUSP14</i>    | ILMN_9561   | NM_007026.1    | -0.96879883  | 1.261528702 | 0.00012174 |
| <i>ZFP91</i>     | ILMN_4526   | NM_170768.1    | -0.972236704 | 0.893726582 | 0.00243123 |
| <i>MAX</i>       | ILMN_19642  | NM_145114.1    | -0.972555189 | 0.706014867 | 0.00664976 |
| <i>RLF</i>       | ILMN_14015  | NM_012421.1    | -0.973603494 | 1.250131376 | 0.00126026 |
| <i>PTGER4</i>    | ILMN_13328  | NM_000958.2    | -0.974694545 | 0.840103103 | 0.00052976 |
| <i>H2AFV</i>     | ILMN_29030  | NM_138635.2    | -0.975093302 | 0.871705932 | 0.00441653 |
| <i>JMJD1A</i>    | ILMN_25544  | NM_018433.3    | -0.975719199 | 1.672444208 | 0.00000036 |
| <i>CTLA4</i>     | ILMN_138103 | NM_005214.2    | -0.975971478 | 1.185608797 | 0.00002484 |
| <i>MGC3020</i>   | ILMN_29369  | NM_024048.2    | -0.97855089  | 0.708809095 | 0.00778758 |
| <i>PLXDC1</i>    | ILMN_8865   | NM_020405.3    | -0.981718421 | 1.136980201 | 0.00048398 |
| <i>EIF5A2</i>    | ILMN_4591   | NM_020390.5    | -0.983175786 | 1.370404889 | 0.00006957 |
| <i>POLR3E</i>    | ILMN_12465  | NM_018119.2    | -0.983687344 | 1.022719891 | 0.00225480 |
| <i>C14orf102</i> | ILMN_22111  | NM_017970.2    | -0.983885026 | 0.923757623 | 0.00012445 |
| <i>SLC3A2</i>    | ILMN_7086   | NM_001012661.1 | -0.984338149 | 1.129641218 | 0.00042718 |
| <i>SOX8</i>      | ILMN_30180  | NM_014587.2    | -0.984450805 | 0.837242057 | 0.00251059 |
| <i>PDZD8</i>     | ILMN_28006  | NM_173791.2    | -0.987766685 | 1.056312215 | 0.00391212 |
| <i>GNLY</i>      | ILMN_13145  | NM_012483.1    | -0.988780036 | 0.682561583 | 0.00361821 |
| <i>KLHL15</i>    | ILMN_4687   | NM_030624.1    | -0.991874786 | 0.87533629  | 0.00164519 |
| <i>SREBF1</i>    | ILMN_21143  | NM_004176.3    | -0.993698671 | 1.055990247 | 0.00040999 |
| <i>STARD5</i>    | ILMN_18773  | NM_181900.2    | -0.99655088  | 1.272232835 | 0.00057152 |
| <i>NAT6</i>      | ILMN_29898  | NM_012191.2    | -0.996896062 | 1.52838856  | 0.00000474 |
| <i>RNMT</i>      | ILMN_23400  | NM_003799.1    | -0.999891612 | 0.895566178 | 0.00800594 |
| <i>RAPGEF1</i>   | ILMN_2480   | NM_005312.2    | -1.000315423 | 1.638795745 | 0.00000591 |
| <i>DNAH1</i>     | ILMN_7494   | NM_015512.3    | -1.001506589 | 1.481165705 | 0.00001576 |
| <i>KIAA1875</i>  | ILMN_5826   | NM_032529.1    | -1.001629269 | 1.062064033 | 0.00062761 |

|                   |             |                |              |             |            |
|-------------------|-------------|----------------|--------------|-------------|------------|
| <i>DIP2A</i>      | ILMN_26238  | NM_206890.1    | -1.003609357 | 1.096616183 | 0.00024842 |
| <i>ILF3</i>       | ILMN_3208   | NM_012218.2    | -1.004941901 | 1.13215569  | 0.00011859 |
| <i>ODC1</i>       | ILMN_21065  | NM_002539.1    | -1.011380594 | 1.419153265 | 0.00019692 |
| <i>SCNN1D</i>     | ILMN_8248   | NM_002978.2    | -1.011891425 | 1.535756779 | 0.00001507 |
| <i>hCAP-H2</i>    | ILMN_12341  | NM_152299.1    | -1.012825824 | 1.353763367 | 0.00005147 |
| <i>DDX24</i>      | ILMN_10146  | NM_020414.3    | -1.013524336 | 1.062762256 | 0.00240995 |
| <i>REXO1</i>      | ILMN_20923  | NM_020695.2    | -1.016680475 | 1.407635807 | 0.00002962 |
| <i>NOP5/NOP58</i> | ILMN_4530   | NM_015934.3    | -1.018736595 | 1.147467699 | 0.00023180 |
| <i>ABL1</i>       | ILMN_22641  | NM_007313.2    | -1.018830246 | 1.330932128 | 0.00048762 |
| <i>SLC11A2</i>    | ILMN_10129  | NM_000617.1    | -1.019608873 | 1.246218549 | 0.00040787 |
| <i>FLJ20309</i>   | ILMN_19726  | NM_017759.2    | -1.020911214 | 0.942698875 | 0.00971642 |
| <i>SERPINF1</i>   | ILMN_19076  | NM_002615.4    | -1.021431387 | 1.036808834 | 0.00072847 |
| <i>BCDIN3</i>     | ILMN_8017   | NM_019606.4    | -1.022041487 | 1.291557277 | 0.00000739 |
| <i>FBXO11</i>     | ILMN_25889  | NM_018693.2    | -1.022222638 | 1.37168029  | 0.00002258 |
| <i>COBLL1</i>     | ILMN_12678  | NM_014900.3    | -1.022816897 | 0.832426581 | 0.00145449 |
| <i>ARMC5</i>      | ILMN_5121   | NM_024742.1    | -1.028127871 | 1.39228155  | 0.00008707 |
| <i>MRPL54</i>     | ILMN_1467   | NM_172251.1    | -1.029024922 | 0.906380196 | 0.00022165 |
| <i>SNIP1</i>      | ILMN_9410   | NM_024700.2    | -1.030911731 | 1.060761685 | 0.00006829 |
| <i>Rgr</i>        | ILMN_28738  | NM_153615.1    | -1.034056441 | 1.003839655 | 0.00013352 |
| <i>STIM2</i>      | ILMN_15073  | NM_020860.1    | -1.035049116 | 1.505310421 | 0.00000717 |
| <i>TCEA3</i>      | ILMN_27218  | NM_003196.1    | -1.036935308 | 1.127944699 | 0.00016303 |
| <i>ZBTB32</i>     | ILMN_2617   | NM_014383.1    | -1.037514656 | 1.188535314 | 0.00063147 |
| <i>SPTY2D1</i>    | ILMN_1945   | NM_194285.2    | -1.038141646 | 1.175704959 | 0.00631444 |
| <i>ANKRD39</i>    | ILMN_23002  | NM_016466.4    | -1.038769229 | 1.128394344 | 0.00022143 |
| <i>ZCCHC14</i>    | ILMN_138708 | NM_015144.1    | -1.040336024 | 1.291139581 | 0.00034769 |
| <i>INADL</i>      | ILMN_3904   | NM_176878.1    | -1.040993021 | 1.70357126  | 0.00000101 |
| <i>ZBTB4</i>      | ILMN_5011   | NM_020899.2    | -1.042333959 | 2.031811569 | 0.00000000 |
| <i>C20orf7</i>    | ILMN_137958 | NM_024120.2    | -1.045765733 | 1.57133193  | 0.00000698 |
| <i>C1orf69</i>    | ILMN_10199  | NM_001010867.1 | -1.048307962 | 1.041440424 | 0.00247324 |
| <i>SLC9A8</i>     | ILMN_27475  | NM_015266.1    | -1.049442878 | 0.779587623 | 0.00630261 |
| <i>PHGDH</i>      | ILMN_5800   | NM_006623.2    | -1.051702862 | 0.758381948 | 0.00287671 |

|                 |             |                |              |             |            |
|-----------------|-------------|----------------|--------------|-------------|------------|
| <b>ZBTB5</b>    | ILMN_9696   | NM_014872.1    | -1.051925083 | 1.084009802 | 0.00020125 |
| <b>SLC25A23</b> | ILMN_5925   | NM_024103.2    | -1.052611559 | 1.331925841 | 0.00000234 |
| <b>SDCCAG33</b> | ILMN_138968 | NM_005786.3    | -1.053667943 | 1.43026202  | 0.00000293 |
| <b>CENTD1</b>   | ILMN_4742   | NM_015230.2    | -1.055518062 | 1.14550194  | 0.00194764 |
| <b>NR3C1</b>    | ILMN_21266  | NM_001018077.1 | -1.056201278 | 1.244978969 | 0.00045002 |
| <b>IDI1</b>     | ILMN_20349  | NM_004508.2    | -1.056483224 | 1.15471556  | 0.00161248 |
| <b>CRY2</b>     | ILMN_2356   | NM_021117.1    | -1.056792523 | 1.695128921 | 0.00001890 |
| <b>AP3M2</b>    | ILMN_568    | NM_006803.2    | -1.059707152 | 0.793326683 | 0.00120162 |
| <b>FLJ22531</b> | ILMN_1491   | NM_024650.2    | -1.062235578 | 1.084659578 | 0.00022721 |
| <b>AXIN2</b>    | ILMN_26857  | NM_004655.2    | -1.063024843 | 0.656651343 | 0.00432164 |
| <b>CDH23</b>    | ILMN_16568  | NM_022124.2    | -1.069963463 | 1.525466254 | 0.00033029 |
| <b>POFUT2</b>   | ILMN_24199  | NM_133635.3    | -1.072201453 | 1.263952694 | 0.00028523 |
| <b>SLC29A2</b>  | ILMN_26468  | NM_001532.2    | -1.074548495 | 1.110901088 | 0.00003703 |
| <b>SUPV3L1</b>  | ILMN_23318  | NM_003171.2    | -1.075228735 | 1.666073917 | 0.00002209 |
| <b>TP53BP2</b>  | ILMN_9205   | NM_001031685.1 | -1.078450208 | 1.196004171 | 0.00093875 |
| <b>PIGA</b>     | ILMN_4309   | NM_020472.1    | -1.079728767 | 0.950416392 | 0.00209788 |
| <b>HOOK1</b>    | ILMN_4311   | NM_015888.3    | -1.083236126 | 0.928616441 | 0.00128459 |
| <b>TRIM39</b>   | ILMN_8004   | NM_172016.1    | -1.083346862 | 1.564079883 | 0.00003575 |
| <b>ZNF10</b>    | ILMN_24152  | NM_015394.4    | -1.084199045 | 1.15199778  | 0.00100454 |
| <b>TGFBR3</b>   | ILMN_22620  | NM_003243.2    | -1.084226172 | 1.128488295 | 0.00005957 |
| <b>EIF2AK3</b>  | ILMN_26832  | NM_004836.3    | -1.085003976 | 1.637926145 | 0.00017908 |
| <b>ITM2C</b>    | ILMN_26681  | NM_030926.4    | -1.090792126 | 0.871247944 | 0.00032229 |
| <b>BRWD1</b>    | ILMN_28841  | NM_001007246.1 | -1.091496504 | 1.464860651 | 0.00017778 |
| <b>UBE2L3</b>   | ILMN_9533   | NM_198157.1    | -1.095698317 | 0.905055567 | 0.00036489 |
| <b>SATB1</b>    | ILMN_6836   | NM_002971.2    | -1.097599208 | 1.281847843 | 0.00009024 |
| <b>WWP2</b>     | ILMN_7085   | NM_199423.1    | -1.098543058 | 1.022921304 | 0.00013328 |
| <b>ARL4C</b>    | ILMN_15416  | NM_005737.3    | -1.100859167 | 1.576249216 | 0.00000041 |
| <b>IER2</b>     | ILMN_12423  | NM_004907.2    | -1.102360836 | 0.850031142 | 0.00439957 |
| <b>MC1R</b>     | ILMN_25536  | NM_002386.2    | -1.107207251 | 0.927711281 | 0.00209384 |
| <b>HIPK2</b>    | ILMN_29690  | NM_022740.2    | -1.109902186 | 0.848263301 | 0.00019985 |
| <b>KIAA0863</b> | ILMN_6906   | NM_014913.2    | -1.110899409 | 1.338766228 | 0.00059178 |

|                  |             |                |              |             |            |
|------------------|-------------|----------------|--------------|-------------|------------|
| <i>TRERF1</i>    | ILMN_11192  | NM_033501.1    | -1.111168158 | 1.381573081 | 0.00006062 |
| <i>SUSD4</i>     | ILMN_139385 | NM_017982.1    | -1.118672404 | 1.052960579 | 0.00022936 |
| <i>PDE3B</i>     | ILMN_5085   | NM_000922.2    | -1.119749363 | 1.260525562 | 0.00003540 |
| <i>SFMBT1</i>    | ILMN_20774  | NM_001005158.1 | -1.122680128 | 1.054502396 | 0.00301102 |
| <i>SUPT5H</i>    | ILMN_15760  | NM_003169.2    | -1.123627354 | 1.099088419 | 0.00044748 |
| <i>RHOF</i>      | ILMN_1762   | NM_019034.2    | -1.126315274 | 1.375102017 | 0.00031725 |
| <i>LPHN1</i>     | ILMN_12017  | NM_014921.3    | -1.138476162 | 1.662119528 | 0.00000917 |
| <i>PRR8</i>      | ILMN_25238  | NM_053043.1    | -1.142802208 | 1.880951403 | 0.00000131 |
| <i>ADORA2A</i>   | ILMN_8227   | NM_000675.3    | -1.145913244 | 0.930252378 | 0.00199321 |
| <i>FBXL11</i>    | ILMN_12629  | NM_012308.1    | -1.148612325 | 1.152483839 | 0.00010613 |
| <i>KBTBD8</i>    | ILMN_23329  | NM_032505.1    | -1.150383237 | 0.980994072 | 0.00298577 |
| <i>C16orf60</i>  | ILMN_10665  | NM_018455.3    | -1.150703459 | 0.875738978 | 0.00533009 |
| <i>ARID5A</i>    | ILMN_12305  | NM_212481.1    | -1.153235059 | 1.005507042 | 0.00791543 |
| <i>BAG3</i>      | ILMN_9420   | NM_004281.3    | -1.155985342 | 1.051113868 | 0.00115372 |
| <i>PLEKHB1</i>   | ILMN_2859   | NM_021200.1    | -1.164061785 | 1.740371718 | 0.00000559 |
| <i>TNFRSF13B</i> | ILMN_9141   | NM_012452.2    | -1.166101521 | 0.812444288 | 0.00410135 |
| <i>SLC25A34</i>  | ILMN_6699   | NM_207348.1    | -1.176664306 | 1.580127428 | 0.00002748 |
| <i>ATHL1</i>     | ILMN_138992 | NM_025092.1    | -1.180243174 | 0.927738706 | 0.00201768 |
| <i>PCK2</i>      | ILMN_26008  | NM_002595.2    | -1.183475914 | 1.128966884 | 0.00538235 |
| <i>RNF103</i>    | ILMN_17861  | NM_005667.2    | -1.185091047 | 1.060017872 | 0.00079149 |
| <i>RSC1A1</i>    | ILMN_3431   | NM_006511.1    | -1.187594127 | 1.371416969 | 0.00063915 |
| <i>ATP2A3</i>    | ILMN_6507   | NM_174958.1    | -1.189495716 | 1.110979165 | 0.00436586 |
| <i>PRC1</i>      | ILMN_20465  | NM_003981.2    | -1.190523415 | 1.021719819 | 0.00448523 |
| <i>DUSP10</i>    | ILMN_14599  | NM_144728.1    | -1.195047913 | 1.017629683 | 0.00887235 |
| <i>ZFAND2A</i>   | ILMN_21900  | NM_182491.1    | -1.205318845 | 1.015840107 | 0.00003574 |
| <i>LMTK2</i>     | ILMN_18423  | NM_014916.2    | -1.206957664 | 1.253180161 | 0.00047386 |
| <i>P2RY11</i>    | ILMN_12237  | NM_002566.4    | -1.210259935 | 1.06355304  | 0.00041398 |
| <i>RNF10</i>     | ILMN_14490  | NM_014868.3    | -1.210970564 | 1.237971365 | 0.00020066 |
| <i>AQP3</i>      | ILMN_22744  | NM_004925.3    | -1.211854338 | 1.043353942 | 0.00058054 |
| <i>LRIG1</i>     | ILMN_3319   | NM_015541.2    | -1.215707138 | 0.887627098 | 0.00096494 |
| <i>P2RY8</i>     | ILMN_28691  | NM_178129.3    | -1.219269472 | 0.98848837  | 0.00126480 |

|                 |            |                |              |             |            |
|-----------------|------------|----------------|--------------|-------------|------------|
| <i>MLL5</i>     | ILMN_9061  | NM_018682.2    | -1.223435851 | 1.970466771 | 0.00001201 |
| <i>NGFRAP1</i>  | ILMN_7162  | NM_014380.1    | -1.232227015 | 1.206946971 | 0.00003357 |
| <i>TKTL1</i>    | ILMN_23315 | NM_012253.2    | -1.234316429 | 0.966661273 | 0.00017305 |
| <i>C6orf105</i> | ILMN_10287 | NM_032744.1    | -1.239896797 | 0.885246225 | 0.00101737 |
| <i>RAB33A</i>   | ILMN_2535  | NM_004794.2    | -1.241055838 | 1.260240271 | 0.00047052 |
| <i>SPRY2</i>    | ILMN_19344 | NM_005842.2    | -1.241885867 | 1.021584875 | 0.00382667 |
| <i>CXCR3</i>    | ILMN_2029  | NM_001504.1    | -1.244115035 | 0.979138466 | 0.00777972 |
| <i>PIM3</i>     | ILMN_19535 | NM_001001852.2 | -1.246301965 | 0.788206936 | 0.00461466 |
| <i>PLEKHF1</i>  | ILMN_25787 | NM_024310.2    | -1.250552556 | 1.09224994  | 0.00017933 |
| <i>ZNF335</i>   | ILMN_9501  | NM_022095.3    | -1.251403176 | 1.416122752 | 0.00000374 |
| <i>TIPARP</i>   | ILMN_4419  | NM_015508.2    | -1.252940769 | 0.785601153 | 0.00628327 |
| <i>PAPD5</i>    | ILMN_11715 | NM_022447.1    | -1.25411808  | 1.168275365 | 0.00090546 |
| <i>GJA12</i>    | ILMN_6786  | NM_020435.2    | -1.257644209 | 1.320134633 | 0.00016783 |
| <i>CRSP7</i>    | ILMN_14940 | NM_004831.3    | -1.261907049 | 1.49395962  | 0.00002501 |
| <i>C1orf21</i>  | ILMN_26434 | NM_030806.3    | -1.265697427 | 1.169849    | 0.00014912 |
| <i>MIDN</i>     | ILMN_6472  | NM_177401.4    | -1.266404108 | 0.946703753 | 0.00048229 |
| <i>PASK</i>     | ILMN_19873 | NM_015148.2    | -1.276320058 | 0.912776289 | 0.00129334 |
| <i>CAMK4</i>    | ILMN_5327  | NM_001744.3    | -1.277241788 | 1.681851719 | 0.00001813 |
| <i>LOC90826</i> | ILMN_17873 | NM_138364.2    | -1.27785886  | 1.15131075  | 0.00042332 |
| <i>ATXN7L2</i>  | ILMN_6796  | NM_153340.2    | -1.280663545 | 1.891153588 | 0.00000392 |
| <i>PTP4A1</i>   | ILMN_27315 | NM_003463.3    | -1.280755813 | 0.981037923 | 0.00088222 |
| <i>OVGP1</i>    | ILMN_7829  | NM_002557.3    | -1.280833537 | 2.145648028 | 0.00000006 |
| <i>SMPD1</i>    | ILMN_8257  | NM_001007593.1 | -1.28381406  | 1.165957203 | 0.00027206 |
| <i>CHD7</i>     | ILMN_29669 | NM_017780.2    | -1.285175635 | 1.611575053 | 0.00000132 |
| <i>ZHX2</i>     | ILMN_21703 | NM_014943.3    | -1.289399266 | 1.042646216 | 0.00479687 |
| <i>TSEN54</i>   | ILMN_8569  | NM_207346.1    | -1.291774    | 1.143237204 | 0.00080973 |
| <i>KTN1</i>     | ILMN_29637 | NM_182926.1    | -1.292563877 | 1.679784537 | 0.00002236 |
| <i>RWDD1</i>    | ILMN_29174 | NM_016104.2    | -1.295908497 | 1.158676772 | 0.00112686 |
| <i>NXT1</i>     | ILMN_26865 | NM_013248.2    | -1.303466657 | 1.103790462 | 0.00006758 |
| <i>IRF4</i>     | ILMN_12414 | NM_002460.1    | -1.304331316 | 2.190738858 | 0.00000044 |
| <i>UAP1</i>     | ILMN_7007  | NM_003115.3    | -1.304761251 | 1.006944977 | 0.00035277 |

|                  |             |                |              |             |            |
|------------------|-------------|----------------|--------------|-------------|------------|
| <b>ANKRD37</b>   | ILMN_2423   | NM_181726.1    | -1.308150345 | 0.937315673 | 0.00117745 |
| <b>DDX6</b>      | ILMN_25649  | NM_004397.3    | -1.309650532 | 2.155651735 | 0.00000030 |
| <b>LOC285513</b> | ILMN_8803   | NM_198281.1    | -1.313429509 | 1.546964677 | 0.00004860 |
| <b>TAF5L</b>     | ILMN_6399   | NM_001025247.1 | -1.32305886  | 1.278931108 | 0.00002693 |
| <b>CMTM8</b>     | ILMN_19577  | NM_178868.3    | -1.325376459 | 0.983647445 | 0.00014993 |
| <b>SLC16A10</b>  | ILMN_10556  | NM_018593.3    | -1.327387377 | 1.108265763 | 0.00009461 |
| <b>FYTTD1</b>    | ILMN_5513   | NM_001011537.1 | -1.329127617 | 1.018346452 | 0.00030597 |
| <b>PBX4</b>      | ILMN_11004  | NM_025245.1    | -1.333943281 | 0.986938102 | 0.00304411 |
| <b>PTGDS</b>     | ILMN_19248  | NM_000954.5    | -1.334379734 | 0.752694849 | 0.00189346 |
| <b>TNFSF9</b>    | ILMN_18030  | NM_003811.2    | -1.335068602 | 1.026974042 | 0.00016772 |
| <b>CNN3</b>      | ILMN_15358  | NM_001839.2    | -1.338292839 | 1.112524436 | 0.00048147 |
| <b>ZNF295</b>    | ILMN_12236  | NM_020727.3    | -1.353598502 | 1.304194049 | 0.00116404 |
| <b>CCR7</b>      | ILMN_21335  | NM_001838.2    | -1.359887042 | 0.918007418 | 0.00010383 |
| <b>BCL9L</b>     | ILMN_27555  | NM_182557.1    | -1.360587969 | 1.095800517 | 0.00209233 |
| <b>IRF2BP2</b>   | ILMN_5645   | NM_182972.1    | -1.370069134 | 0.969007786 | 0.00052119 |
| <b>RASA3</b>     | ILMN_19501  | NM_007368.2    | -1.3738673   | 1.455515605 | 0.00002815 |
| <b>ARRDC2</b>    | ILMN_7560   | NM_015683.1    | -1.379096994 | 1.114271453 | 0.00156368 |
| <b>SCML1</b>     | ILMN_138894 | NM_006746.3    | -1.381562596 | 1.167403576 | 0.00101569 |
| <b>KIAA1754</b>  | ILMN_13119  | NM_033397.2    | -1.38432219  | 1.12747861  | 0.00001941 |
| <b>MAL</b>       | ILMN_3411   | NM_002371.2    | -1.393195146 | 2.207099447 | 0.00000002 |
| <b>MCM6</b>      | ILMN_15791  | NM_005915.4    | -1.39751721  | 1.334945131 | 0.00049304 |
| <b>H2AFX</b>     | ILMN_23585  | NM_002105.2    | -1.40589861  | 1.466002611 | 0.00007136 |
| <b>ZFPM1</b>     | ILMN_15190  | NM_153813.1    | -1.407664057 | 0.875418487 | 0.00457871 |
| <b>EIF2C2</b>    | ILMN_25413  | NM_012154.2    | -1.417512796 | 1.665176969 | 0.00023257 |
| <b>BHLHB2</b>    | ILMN_24095  | NM_003670.1    | -1.418174041 | 0.889047464 | 0.00057911 |
| <b>BRD1</b>      | ILMN_19562  | NM_014577.1    | -1.428483553 | 1.226958019 | 0.00098546 |
| <b>CTH</b>       | ILMN_4045   | NM_153742.3    | -1.429744393 | 0.844427128 | 0.00829306 |
| <b>FLT3LG</b>    | ILMN_4754   | NM_001459.2    | -1.440491375 | 1.580411425 | 0.00003438 |
| <b>SLC5A6</b>    | ILMN_880    | NM_021095.1    | -1.45459924  | 1.033310371 | 0.00195215 |
| <b>DYNLL2</b>    | ILMN_28971  | NM_080677.1    | -1.455649083 | 1.2977239   | 0.00000465 |
| <b>GMEB2</b>     | ILMN_7174   | NM_012384.2    | -1.456946954 | 1.247345988 | 0.00010064 |

|                  |             |                |              |             |            |
|------------------|-------------|----------------|--------------|-------------|------------|
| <b>GADD45B</b>   | ILMN_138334 | NM_015675.1    | -1.45927016  | 0.890864982 | 0.00134377 |
| <b>PRR7</b>      | ILMN_17178  | NM_030567.2    | -1.459895146 | 1.238910411 | 0.00004716 |
| <b>NR1D2</b>     | ILMN_17981  | NM_005126.2    | -1.463555459 | 1.152704022 | 0.00084447 |
| <b>CD69</b>      | ILMN_13491  | NM_001781.1    | -1.467514074 | 0.767635098 | 0.00431058 |
| <b>FASN</b>      | ILMN_16128  | NM_004104.4    | -1.474522935 | 0.834416803 | 0.00868356 |
| <b>LOC158830</b> | ILMN_10937  | NM_001025265.1 | -1.492231983 | 1.659484712 | 0.00001229 |
| <b>K6IRS2</b>    | ILMN_14872  | NM_080747.1    | -1.494649542 | 0.857170698 | 0.00873840 |
| <b>BTG3</b>      | ILMN_27215  | NM_006806.3    | -1.49479515  | 1.027933063 | 0.00054222 |
| <b>BZRAP1</b>    | ILMN_11647  | NM_004758.1    | -1.502581736 | 1.509465143 | 0.00001428 |
| <b>OCIAD2</b>    | ILMN_18246  | NM_152398.2    | -1.50757606  | 1.074604795 | 0.00011990 |
| <b>MN1</b>       | ILMN_3720   | NM_002430.2    | -1.509096037 | 1.199838716 | 0.00627720 |
| <b>CASZ1</b>     | ILMN_27214  | NM_017766.2    | -1.513362235 | 1.067663278 | 0.00068936 |
| <b>MGAT4A</b>    | ILMN_139237 | NM_012214.1    | -1.516364202 | 1.43878649  | 0.00001522 |
| <b>DHCR7</b>     | ILMN_2138   | NM_001360.1    | -1.521006311 | 1.09154978  | 0.00456684 |
| <b>FLJ20152</b>  | ILMN_139301 | NM_019000.2    | -1.529809004 | 1.570604078 | 0.00000028 |
| <b>VPS37B</b>    | ILMN_18457  | NM_024667.1    | -1.535202738 | 1.386660943 | 0.00053514 |
| <b>MGC17330</b>  | ILMN_15026  | NM_052880.3    | -1.549289306 | 2.615593431 | 0.00000000 |
| <b>ICOS</b>      | ILMN_9996   | NM_012092.2    | -1.55851009  | 0.844005633 | 0.00079917 |
| <b>HIVEP1</b>    | ILMN_6517   | NM_002114.1    | -1.565011369 | 1.269386062 | 0.00098464 |
| <b>DUSP5</b>     | ILMN_12928  | NM_004419.3    | -1.568760545 | 0.926620188 | 0.00027977 |
| <b>CCRN4L</b>    | ILMN_2730   | NM_012118.2    | -1.57585378  | 0.676954674 | 0.00941115 |
| <b>DDIT3</b>     | ILMN_16748  | NM_004083.4    | -1.580473683 | 0.904339432 | 0.00035640 |
| <b>SFXN1</b>     | ILMN_16398  | NM_022754.4    | -1.584214832 | 1.584567288 | 0.00000684 |
| <b>IL23A</b>     | ILMN_20797  | NM_016584.2    | -1.592231591 | 1.093073096 | 0.00085884 |
| <b>CD248</b>     | ILMN_25766  | NM_020404.2    | -1.593596823 | 1.03796568  | 0.00063579 |
| <b>TMEM119</b>   | ILMN_30233  | NM_181724.1    | -1.610801334 | 1.060679622 | 0.00207322 |
| <b>ICOSLG</b>    | ILMN_28135  | NM_015259.4    | -1.614784424 | 1.230937184 | 0.00073267 |
| <b>IL21R</b>     | ILMN_12364  | NM_181078.1    | -1.616207162 | 1.128564536 | 0.00074184 |
| <b>DDX39</b>     | ILMN_23076  | NM_138998.1    | -1.658427147 | 1.367587877 | 0.00016648 |
| <b>FHIT</b>      | ILMN_15082  | NM_002012.1    | -1.673448104 | 1.828433492 | 0.00000036 |
| <b>MTP18</b>     | ILMN_13393  | NM_016498.3    | -1.68269229  | 1.49713298  | 0.00000170 |

|                 |            |                |              |             |            |
|-----------------|------------|----------------|--------------|-------------|------------|
| <b>BRD4</b>     | ILMN_22169 | NM_058243.1    | -1.683630214 | 1.449106676 | 0.00043360 |
| <b>SPRY1</b>    | ILMN_23549 | NM_199327.1    | -1.685777091 | 1.00030247  | 0.00128713 |
| <b>PPP1R16B</b> | ILMN_26824 | NM_015568.2    | -1.718794599 | 1.300533176 | 0.00009419 |
| <b>NAP1L5</b>   | ILMN_5355  | NM_153757.1    | -1.728193379 | 1.563329697 | 0.00001555 |
| <b>TNF</b>      | ILMN_24087 | NM_000594.2    | -1.730636109 | 0.817723797 | 0.00871514 |
| <b>RGC32</b>    | ILMN_14549 | NM_014059.1    | -1.735045244 | 1.070386047 | 0.00010195 |
| <b>ZC3H12A</b>  | ILMN_18682 | NM_025079.1    | -1.735762717 | 0.908241129 | 0.00147260 |
| <b>MXRA7</b>    | ILMN_628   | NM_001008528.1 | -1.748431483 | 0.973613834 | 0.00291921 |
| <b>SC5DL</b>    | ILMN_24287 | NM_006918.3    | -1.750481592 | 1.151071938 | 0.00272999 |
| <b>UBE2D2</b>   | ILMN_27792 | NM_181838.1    | -1.757736084 | 1.428181422 | 0.00001760 |
| <b>FGF9</b>     | ILMN_1771  | NM_002010.1    | -1.760403535 | 1.428823821 | 0.00010647 |
| <b>YES1</b>     | ILMN_1505  | NM_005433.3    | -1.764392963 | 1.318925488 | 0.00039148 |
| <b>ZNF165</b>   | ILMN_8007  | NM_003447.2    | -1.773928105 | 1.218351034 | 0.00025979 |
| <b>CCNT1</b>    | ILMN_1033  | NM_001240.2    | -1.786747551 | 1.130941224 | 0.00097410 |
| <b>PLK3</b>     | ILMN_8968  | NM_004073.2    | -1.790107415 | 1.123509115 | 0.00033397 |
| <b>JOSD1</b>    | ILMN_21647 | NM_014876.3    | -1.797931989 | 1.466413364 | 0.00000333 |
| <b>SOCS1</b>    | ILMN_3038  | NM_003745.1    | -1.807780801 | 0.953587459 | 0.00028092 |
| <b>AVP11</b>    | ILMN_9920  | NM_021732.1    | -1.844873323 | 0.793664838 | 0.00101944 |
| <b>TSPYL2</b>   | ILMN_26999 | NM_022117.1    | -1.845460576 | 1.080002715 | 0.00158472 |
| <b>GPR132</b>   | ILMN_19860 | NM_013345.2    | -1.858180805 | 1.009628034 | 0.00276606 |
| <b>FGFRL1</b>   | ILMN_28273 | NM_001004358.1 | -1.86348235  | 1.136549742 | 0.00251797 |
| <b>AXUD1</b>    | ILMN_6524  | NM_033027.2    | -1.865941039 | 1.074402426 | 0.00002134 |
| <b>DBH</b>      | ILMN_25962 | NM_000787.2    | -1.875893893 | 1.358238144 | 0.00199035 |
| <b>GADD45G</b>  | ILMN_4884  | NM_006705.2    | -1.883200245 | 1.092648505 | 0.00159004 |
| <b>ELL2</b>     | ILMN_15317 | NM_012081.3    | -1.895230568 | 1.054802224 | 0.00923017 |
| <b>JUN</b>      | ILMN_7746  | NM_002228.3    | -1.93716324  | 1.35200957  | 0.00128284 |
| <b>CD5</b>      | ILMN_29547 | NM_014207.2    | -1.969005232 | 1.472172181 | 0.00001058 |
| <b>CCL4L1</b>   | ILMN_4819  | NM_001001435.2 | -1.972847504 | 0.777562423 | 0.00687597 |
| <b>DLL1</b>     | ILMN_1802  | NM_005618.2    | -1.981683353 | 1.243856495 | 0.00029039 |
| <b>TP53INP2</b> | ILMN_28839 | NM_021202.1    | -1.987037329 | 0.803135548 | 0.00674516 |
| <b>GADD45A</b>  | ILMN_17355 | NM_001924.2    | -2.011561809 | 1.213085063 | 0.00005108 |



|                |             |             |              |             |            |
|----------------|-------------|-------------|--------------|-------------|------------|
| <i>USP36</i>   | ILMN_23872  | NM_025090.2 | -2.045788282 | 1.389118043 | 0.00005194 |
| <i>DUSP2</i>   | ILMN_21154  | NM_004418.2 | -2.049331375 | 0.994473822 | 0.00002824 |
| <i>GRASP</i>   | ILMN_11141  | NM_181711.1 | -2.181045645 | 0.887808594 | 0.00177700 |
| <i>JMY</i>     | ILMN_18491  | NM_152405.1 | -2.214065556 | 1.559103931 | 0.00008945 |
| <i>SMAD7</i>   | ILMN_10011  | NM_005904.2 | -2.21499091  | 1.138519775 | 0.00041631 |
| <i>DUSP8</i>   | ILMN_21272  | NM_004420.1 | -2.243733266 | 1.648409441 | 0.00000576 |
| <i>K6IRS3</i>  | ILMN_13180  | NM_175068.2 | -2.248575123 | 1.805083434 | 0.00001610 |
| <i>FOSB</i>    | ILMN_13603  | NM_006732.1 | -2.312871227 | 0.610878937 | 0.00583158 |
| <i>GALR2</i>   | ILMN_4188   | NM_003857.2 | -2.318004128 | 1.295873257 | 0.00007526 |
| <i>NR4A2</i>   | ILMN_28405  | NM_006186.2 | -2.375127134 | 0.693171084 | 0.00105245 |
| <i>CXCL2</i>   | ILMN_29078  | NM_002089.1 | -2.384946205 | 0.672530598 | 0.00878350 |
| <i>SEC14L2</i> | ILMN_9607   | NM_012429.1 | -2.389587687 | 1.369976121 | 0.00048088 |
| <i>CD83</i>    | ILMN_16705  | NM_004233.2 | -2.400607006 | 1.029167736 | 0.00012951 |
| <i>PHACTR1</i> | ILMN_17425  | NM_030948.1 | -2.411791103 | 1.475392994 | 0.00001304 |
| <i>LYPD3</i>   | ILMN_23267  | NM_014400.1 | -2.421971695 | 1.147458967 | 0.00050112 |
| <i>GJB2</i>    | ILMN_26343  | NM_004004.3 | -2.549537207 | 0.975329581 | 0.00657606 |
| <i>ZNF331</i>  | ILMN_28697  | NM_018555.4 | -2.578337112 | 1.033044629 | 0.00014144 |
| <i>RGS16</i>   | ILMN_16445  | NM_002928.2 | -2.807399525 | 0.923543594 | 0.00132862 |
| <i>PHLDA1</i>  | ILMN_138322 | NM_007350.2 | -2.954967361 | 0.995309086 | 0.00237317 |
| <i>SLC7A5</i>  | ILMN_25446  | NM_003486.5 | -3.70325022  | 1.269118167 | 0.00008773 |

**Supp. Table S2E. probe-level intersections between the *PTPN11*, *SOS1* and *SHOC2* signatures**

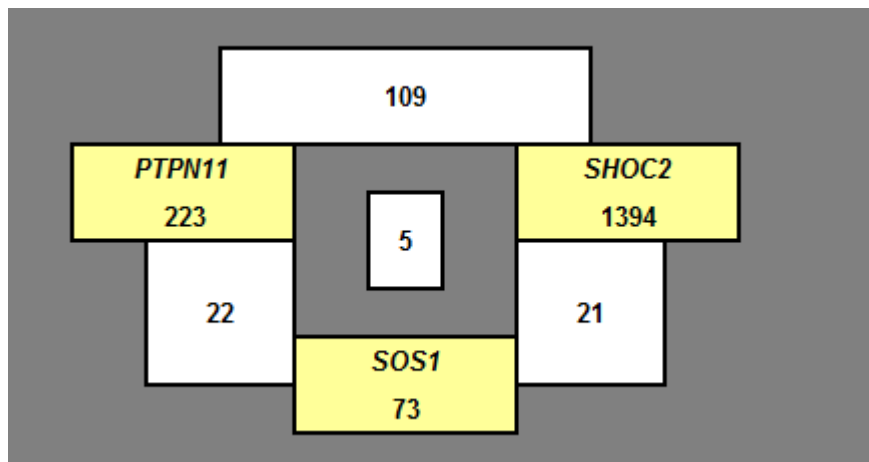

| <b>Supp. Table S3. False Discovery rate analysis</b>   |                         |                                    |                                  |                                   |
|--------------------------------------------------------|-------------------------|------------------------------------|----------------------------------|-----------------------------------|
|                                                        | <b>NS<br/>Signature</b> | <b><i>PTPN11</i><br/>Signature</b> | <b><i>SOS1</i><br/>Signature</b> | <b><i>SHOC2</i><br/>Signature</b> |
| <b>True positives</b>                                  | <b>125</b>              | <b>225</b>                         | <b>73</b>                        | <b>1407</b>                       |
| <b>Median false positives<br/>in 2000 permutations</b> | <b>0</b>                | <b>1</b>                           | <b>4</b>                         | <b>5</b>                          |
| <b>FDR (Median)</b>                                    | <b>0.0%</b>             | <b>0.4%</b>                        | <b>5.5%</b>                      | <b>0.4%</b>                       |
| <b>Median false positives<br/>in 2000 permutations</b> | <b>0.227</b>            | <b>3.203</b>                       | <b>12.082</b>                    | <b>15.514</b>                     |
| <b>FDR (Average)</b>                                   | <b>0.2%</b>             | <b>1.4%</b>                        | <b>16.6%</b>                     | <b>1.1%</b>                       |

**Supp. Table S4A.**  
**Functional annotation analysis (DAVID EASE) of the *PTPN11* Signature**

***PTPN11* SIGNATURE (up-regulated & downregulated genes)**

| Category        | Term                                    | Pvalue   | n° of Genes | Fold Enrichment | Benjamini-corrected p-value |
|-----------------|-----------------------------------------|----------|-------------|-----------------|-----------------------------|
| SP_PIR_KEYWORDS | receptor                                | 1.06E-05 | 24          | 2.805           | 3.97E-04                    |
| SP_PIR_KEYWORDS | SH2 domain                              | 9.38E-06 | 11          | 5.971           | 4.01E-04                    |
| SP_PIR_KEYWORDS | tyrosine-specific protein kinase        | 2.88E-04 | 5           | 13.570          | 7.80E-03                    |
| SP_PIR_KEYWORDS | disulfide bond                          | 1.22E-18 | 57          | 3.683           | 3.65E-16                    |
| UP_SEQ_FEATURE  | disulfide bond                          | 2.96E-18 | 55          | 3.740           | 2.00E-15                    |
| SP_PIR_KEYWORDS | signal                                  | 2.06E-14 | 58          | 2.958           | 3.09E-12                    |
| UP_SEQ_FEATURE  | signal peptide                          | 2.11E-14 | 58          | 2.956           | 7.12E-12                    |
| GOTERM_CC_FAT   | GO:0005886~plasma membrane              | 5.24E-13 | 71          | 2.258           | 1.24E-10                    |
| SP_PIR_KEYWORDS | Secreted                                | 3.60E-11 | 30          | 4.236           | 3.59E-09                    |
| UP_SEQ_FEATURE  | topological domain:Extracellular        | 2.97E-11 | 45          | 2.993           | 6.69E-09                    |
| GOTERM_CC_FAT   | GO:0005576~extracellular region         | 1.14E-10 | 36          | 3.335           | 1.35E-08                    |
| SP_PIR_KEYWORDS | glycoprotein                            | 3.72E-10 | 61          | 2.275           | 2.78E-08                    |
| GOTERM_CC_FAT   | GO:0044421~extracellular region part    | 1.37E-08 | 22          | 4.316           | 1.08E-06                    |
| GOTERM_CC_FAT   | GO:0005615~extracellular space          | 2.03E-08 | 20          | 4.669           | 1.20E-06                    |
| SP_PIR_KEYWORDS | Immunoglobulin domain                   | 5.04E-08 | 17          | 5.393           | 3.01E-06                    |
| GOTERM_CC_FAT   | GO:0031226~intrinsic to plasma membrane | 6.69E-08 | 29          | 3.106           | 3.17E-06                    |
| INTERPRO        | IPR013783:Immunoglobulin-like fold      | 9.09E-09 | 19          | 5.258           | 4.46E-06                    |
| UP_SEQ_FEATURE  | glycosylation site:N-linked (GlcNAc...) | 3.81E-08 | 54          | 2.158           | 6.44E-06                    |
| SP_PIR_KEYWORDS | cell membrane                           | 4.06E-07 | 35          | 2.567           | 2.03E-05                    |
| GOTERM_CC_FAT   | GO:0005887~integral to plasma membrane  | 5.93E-07 | 27          | 2.959           | 2.34E-05                    |

| UP_SEQ_FEATURE                                      | topological domain:Cytoplasmic                          | 2.57E-07 | 51      | 2.099       | 3.47E-05          |
|-----------------------------------------------------|---------------------------------------------------------|----------|---------|-------------|-------------------|
| GOTERM_CC_FAT                                       | GO:0044459~plasma membrane part                         | 6.18E-06 | 41      | 2.045       | 2.09E-04          |
| INTERPRO                                            | IPR013106:Immunoglobulin V-set                          | 3.28E-06 | 10      | 7.611       | 8.05E-04          |
| INTERPRO                                            | IPR000980:SH2 motif                                     | 7.60E-06 | 11      | 6.089       | 1.24E-03          |
| INTERPRO                                            | IPR003599:Immunoglobulin subtype                        | 1.19E-05 | 12      | 5.219       | 1.46E-03          |
| GOTERM_CC_FAT                                       | GO:0009986~cell surface                                 | 5.32E-05 | 14      | 3.801       | 1.58E-03          |
| INTERPRO                                            | IPR007110:Immunoglobulin-like                           | 2.75E-05 | 13      | 4.397       | 2.70E-03          |
| GOTERM_CC_FAT                                       | GO:0009897~external side of plasma membrane             | 1.03E-04 | 10      | 5.075       | 2.72E-03          |
| SP_PIR_KEYWORDS                                     | transmembrane protein                                   | 9.42E-05 | 17      | 3.099       | 3.13E-03          |
| GOTERM_CC_FAT                                       | GO:0016021~integral to membrane                         | 2.35E-04 | 72      | 1.428       | 5.57E-03          |
| GOTERM_BP_FAT                                       | GO:0002684~positive regulation of immune system process | 3.89E-06 | 15      | 4.456       | 6.37E-03          |
| SP_PIR_KEYWORDS                                     | transmembrane                                           | 2.86E-04 | 66      | 1.505       | 8.51E-03          |
| SP_PIR_KEYWORDS                                     | membrane                                                | 3.99E-04 | 86      | 1.381       | 9.88E-03          |
| <b><i>PTPN11</i> SIGNATURE (up-regulated genes)</b> |                                                         |          |         |             |                   |
| Category                                            | Term                                                    | Pvalue   | n° Gene | Fold Enrich | Benjamini p-value |
| UP_SEQ_FEATURE                                      | disulfide bond                                          | 1.72E-10 | 27      | 4.271       | 6.50E-08          |
| SP_PIR_KEYWORDS                                     | disulfide bond                                          | 5.34E-10 | 27      | 4.059       | 1.08E-07          |
| GOTERM_CC_FAT                                       | GO:0005886~plasma membrane                              | 6.49E-09 | 36      | 2.589       | 1.11E-06          |
| SP_PIR_KEYWORDS                                     | signal                                                  | 3.32E-07 | 26      | 3.084       | 3.37E-05          |
| UP_SEQ_FEATURE                                      | signal peptide                                          | 3.35E-07 | 26      | 3.083       | 6.32E-05          |
| SP_PIR_KEYWORDS                                     | glycoprotein                                            | 3.29E-06 | 29      | 2.516       | 2.23E-04          |
| SP_PIR_KEYWORDS                                     | Secreted                                                | 7.51E-06 | 14      | 4.598       | 3.81E-04          |
| GOTERM_CC_FAT                                       | GO:0005615~extracellular space                          | 1.20E-05 | 11      | 5.806       | 6.83E-04          |
| GOTERM_CC_FAT                                       | GO:0005576~extracellular region                         | 9.63E-06 | 17      | 3.561       | 8.23E-04          |
| UP_SEQ_FEATURE                                      | glycosylation site:N-linked (GlcNAc...)                 | 9.17E-06 | 27      | 2.510       | 1.15E-03          |

| GOTERM_CC_FAT                                  | GO:0044421~extracellular region part        | 5.57E-05 | 11          | 4.879           | 2.38E-03                    |
|------------------------------------------------|---------------------------------------------|----------|-------------|-----------------|-----------------------------|
| GOTERM_CC_FAT                                  | GO:0044459~plasma membrane part             | 2.14E-04 | 21          | 2.368           | 7.30E-03                    |
| <b>PTPN11 SIGNATURE (down-regulated genes)</b> |                                             |          |             |                 |                             |
| Category                                       | Term                                        | Pvalue   | n° of Genes | Fold Enrichment | Benjamini-corrected p-value |
| SP_PIR_KEYWORDS                                | disulfide bond                              | 4.79E-09 | 30          | 3.400           | 1.01E-06                    |
| UP_SEQ_FEATURE                                 | topological domain:Extracellular            | 1.07E-08 | 29          | 3.383           | 4.05E-06                    |
| UP_SEQ_FEATURE                                 | disulfide bond                              | 2.83E-08 | 28          | 3.340           | 5.33E-06                    |
| SP_PIR_KEYWORDS                                | signal                                      | 7.35E-08 | 32          | 2.862           | 7.71E-06                    |
| UP_SEQ_FEATURE                                 | signal peptide                              | 7.44E-08 | 32          | 2.860           | 9.35E-06                    |
| SP_PIR_KEYWORDS                                | Secreted                                    | 8.81E-06 | 16          | 3.962           | 6.17E-04                    |
| UP_SEQ_FEATURE                                 | topological domain:Cytoplasmic              | 8.12E-06 | 32          | 2.311           | 7.65E-04                    |
| GOTERM_CC_FAT                                  | GO:0009986~cell surface                     | 2.60E-05 | 11          | 5.354           | 1.02E-03                    |
| SP_PIR_KEYWORDS                                | cell membrane                               | 2.03E-05 | 22          | 2.830           | 1.07E-03                    |
| GOTERM_CC_FAT                                  | GO:0005576~extracellular region             | 1.53E-05 | 19          | 3.156           | 1.20E-03                    |
| GOTERM_CC_FAT                                  | GO:0005886~plasma membrane                  | 2.32E-05 | 35          | 1.996           | 1.22E-03                    |
| GOTERM_CC_FAT                                  | GO:0009897~external side of plasma membrane | 8.74E-06 | 9           | 8.190           | 1.37E-03                    |
| SP_PIR_KEYWORDS                                | SH2 domain                                  | 6.59E-05 | 8           | 7.616           | 2.30E-03                    |
| SP_PIR_KEYWORDS                                | glycoprotein                                | 5.89E-05 | 32          | 2.093           | 2.47E-03                    |
| GOTERM_CC_FAT                                  | GO:0031226~intrinsic to plasma membrane     | 1.35E-04 | 16          | 3.072           | 4.24E-03                    |
| GOTERM_BP_FAT                                  | GO:0042110~T cell activation                | 7.26E-06 | 10          | 7.115           | 4.31E-03                    |
| GOTERM_BP_FAT                                  | GO:0046649~lymphocyte activation            | 4.17E-06 | 12          | 5.831           | 4.95E-03                    |
| SP_PIR_KEYWORDS                                | transmembrane protein                       | 2.43E-04 | 12          | 3.837           | 7.27E-03                    |
| GOTERM_BP_FAT                                  | GO:0045321~leukocyte activation             | 1.97E-05 | 12          | 4.980           | 7.77E-03                    |
| GOTERM_CC_FAT                                  | GO:0044421~extracellular region part        | 4.12E-04 | 11          | 3.870           | 9.21E-03                    |
| SP_PIR_KEYWORDS                                | Immunoglobulin domain                       | 3.64E-04 | 9           | 5.007           | 9.52E-03                    |

|               |                                        |          |    |       |          |
|---------------|----------------------------------------|----------|----|-------|----------|
| GOTERM_CC_FAT | GO:0005887~integral to plasma membrane | 3.76E-04 | 15 | 2.948 | 9.79E-03 |
|---------------|----------------------------------------|----------|----|-------|----------|

**Supp. Table S4B.**  
**Functional annotation analysis (DAVID EASE) of the *SHOC2* signature**

***SHOC2* Signature (up-regulated & downregulated genes)**

| Category       | Term                                    | Pvalue   | n° of Genes | Fold Enrichment | Benjamini-corrected p-value |
|----------------|-----------------------------------------|----------|-------------|-----------------|-----------------------------|
| UP_SEQ_FEATURE | topological domain:Cytoplasmic          | 8.09E-07 | 203         | 1.333           | 2.48E-03                    |
| UP_SEQ_FEATURE | topological domain:Extracellular        | 2.15E-06 | 134         | 1.422           | 3.30E-03                    |
| GOTERM_CC_FAT  | GO:0005886~plasma membrane              | 1.03E-05 | 237         | 1.248           | 5.64E-03                    |
| GOTERM_CC_FAT  | GO:0044459~plasma membrane part         | 2.62E-05 | 159         | 1.314           | 7.14E-03                    |
| UP_SEQ_FEATURE | glycosylation site:N-linked (GlcNAc...) | 8.53E-06 | 203         | 1.294           | 8.69E-03                    |

***SHOC2* Signature (up-regulated genes)**

| Category        | Term                                    | Pvalue   | n° of Genes | Fold Enrichment | Benjamini-corrected p-value |
|-----------------|-----------------------------------------|----------|-------------|-----------------|-----------------------------|
| SP_PIR_KEYWORDS | transmembrane                           | 2.16E-10 | 183         | 1.510           | 9.23E-08                    |
| UP_SEQ_FEATURE  | transmembrane region                    | 1.05E-10 | 183         | 1.522           | 1.52E-07                    |
| SP_PIR_KEYWORDS | membrane                                | 2.30E-08 | 232         | 1.348           | 4.91E-06                    |
| UP_SEQ_FEATURE  | topological domain:Cytoplasmic          | 8.36E-08 | 109         | 1.623           | 6.06E-05                    |
| SP_PIR_KEYWORDS | glycoprotein                            | 1.36E-06 | 113         | 1.524           | 1.94E-04                    |
| UP_SEQ_FEATURE  | glycosylation site:N-linked (GlcNAc...) | 4.15E-07 | 109         | 1.575           | 2.01E-04                    |
| GOTERM_CC_FAT   | GO:0031224~intrinsic to membrane        | 6.23E-06 | 197         | 1.280           | 1.23E-03                    |
| GOTERM_CC_FAT   | GO:0016021~integral to membrane         | 4.19E-06 | 193         | 1.293           | 1.65E-03                    |
| SP_PIR_KEYWORDS | immune response                         | 2.13E-05 | 22          | 2.738           | 2.27E-03                    |

| SP_PIR_KEYWORDS                               | transport                                             | 2.81E-05 | 93          | 1.502           | 2.40E-03                    |
|-----------------------------------------------|-------------------------------------------------------|----------|-------------|-----------------|-----------------------------|
| UP_SEQ_FEATURE                                | topological domain:Extracellular                      | 8.20E-06 | 70          | 1.684           | 2.97E-03                    |
| GOTERM_CC_FAT                                 | GO:0005773~vacuole                                    | 6.96E-05 | 28          | 2.207           | 9.13E-03                    |
| UP_SEQ_FEATURE                                | binding site:Substrate                                | 3.21E-05 | 29          | 2.286           | 9.27E-03                    |
| <b>SHOC2 Signature (down-regulated genes)</b> |                                                       |          |             |                 |                             |
| Category                                      | Term                                                  | Pvalue   | n° of Genes | Fold Enrichment | Benjamini-corrected p-value |
| SP_PIR_KEYWORDS                               | Transcription                                         | 2.71E-11 | 168         | 1.592           | 1.18E-08                    |
| SP_PIR_KEYWORDS                               | transcription regulation                              | 5.48E-11 | 161         | 1.600           | 1.19E-08                    |
| SP_PIR_KEYWORDS                               | nucleus                                               | 4.28E-10 | 318         | 1.313           | 6.20E-08                    |
| SP_PIR_KEYWORDS                               | dna-binding                                           | 1.94E-09 | 129         | 1.635           | 2.11E-07                    |
| GOTERM_BP_FAT                                 | GO:0006350~transcription                              | 1.25E-10 | 171         | 1.533           | 3.40E-07                    |
| GOTERM_BP_FAT                                 | GO:0045449~regulation of transcription                | 1.87E-09 | 188         | 1.448           | 2.54E-06                    |
| SP_PIR_KEYWORDS                               | zinc-finger                                           | 3.15E-07 | 131         | 1.504           | 2.74E-05                    |
| INTERPRO                                      | IPR007087:Zinc finger, C2H2-type                      | 3.54E-08 | 65          | 1.969           | 3.92E-05                    |
| INTERPRO                                      | IPR015880:Zinc finger, C2H2-like                      | 2.02E-07 | 65          | 1.887           | 1.12E-04                    |
| UP_SEQ_FEATURE                                | zinc finger region:C2H2-type 2                        | 7.01E-07 | 52          | 1.997           | 1.38E-03                    |
| UP_SEQ_FEATURE                                | zinc finger region:C2H2-type 4                        | 3.43E-06 | 47          | 1.980           | 3.38E-03                    |
| UP_SEQ_FEATURE                                | zinc finger region:C2H2-type 3                        | 5.81E-06 | 49          | 1.914           | 3.81E-03                    |
| UP_SEQ_FEATURE                                | zinc finger region:C2H2-type 5                        | 2.78E-05 | 42          | 1.921           | 1.36E-02                    |
| UP_SEQ_FEATURE                                | zinc finger region:C2H2-type 1                        | 3.68E-05 | 45          | 1.851           | 1.44E-02                    |
| SP_PIR_KEYWORDS                               | zinc                                                  | 2.02E-04 | 140         | 1.316           | 1.46E-02                    |
| UP_SEQ_FEATURE                                | zinc finger region:C2H2-type 7                        | 4.55E-05 | 35          | 2.028           | 1.48E-02                    |
| UP_SEQ_FEATURE                                | compositionally biased region:Pro-rich                | 6.13E-05 | 61          | 1.644           | 1.71E-02                    |
| GOTERM_BP_FAT                                 | GO:0006355~regulation of transcription, DNA-dependent | 2.33E-05 | 113         | 1.426           | 2.08E-02                    |
| GOTERM_BP_FAT                                 | GO:0051252~regulation of RNA metabolic process        | 3.73E-05 | 114         | 1.409           | 2.50E-02                    |



| <b>Supp. Table S5.</b>                                                     |                                                                      |                                                      |                        |                        |                                        |
|----------------------------------------------------------------------------|----------------------------------------------------------------------|------------------------------------------------------|------------------------|------------------------|----------------------------------------|
| <b>Modulation of transcription factors and their putative target genes</b> |                                                                      |                                                      |                        |                        |                                        |
| <b>Transcription Factor (TF)</b>                                           | <b>TF Modulation</b>                                                 | <b>TF binding site enrichment</b>                    | <b>Opossum Z-Score</b> | <b>Opossum p-value</b> | <b>Hypergeometric analysis p-value</b> |
| <b><i>GFI1</i></b>                                                         | <b>Downregulated in <i>PTPN11</i> and <i>SOS1</i> mutation group</b> | <b>Enriched in <i>PTPN11</i>-downmodulated genes</b> | <b>5.033</b>           | <b>0.0003142</b>       | <b>p&lt;0.0001</b>                     |
| <b><i>GABPA</i></b>                                                        | <b>Upregulated in <i>SOS1</i> and <i>SHOC2</i> mutation group</b>    | <b>Enriched in <i>SOS1</i>-downmodulated genes</b>   | <b>8.295</b>           | <b>0.02257</b>         | <b>p&lt;0.05</b>                       |
| <b><i>CREB1</i></b>                                                        | <b>Upregulated in <i>SHOC2</i> mutation group</b>                    | <b>Enriched in <i>SHOC2</i>-downmodulated genes</b>  | <b>14.32</b>           | <b>0.00144</b>         | <b>p&lt;0.00001</b>                    |
| <b><i>SPI1</i></b>                                                         | <b>Upregulated in <i>SHOC2</i> mutation group</b>                    | <b>Enriched in <i>SHOC2</i>-downmodulated genes</b>  | <b>7.007</b>           | <b>0.007963</b>        | <b>p&lt;0.00001</b>                    |
